# Supplementary material for: Expressing diminutive meaning in heritage Spanish: linking the heritage experience to diminutive use in everyday speech
Source: Frontiers journal article supplement (doi:10.3389/flang.2024.1377977), 2024-07-08
Supplement: Table_1.XLSX [file Table_1.XLSX]

## Sheet: Diminutives CESA Corpus
Informant	Sex	Age	Education	Place of Birth	Mother PoB	Father PoB	Sentence where the token occurred	Target Token	child sense	Semantic Sense	DIM type	Allomorph	Lexicalized	Word type	Pragmatics
CESA001	f	50-59	High School	US	US	Mexico	Pero mi abuelita sí, y luego los papás de mi, de mi papá /okey/. So, eh, fueron tres. Y todos hablaban español.	abuelita			ito	ito	no	N	2a
	f						[¿Algunos de tus hijos hablan español?] Um XY [nombre] un poquito y XY entiende pero no habla muncho. /mhm/ Y mi hij-, tengo un hijo que- dice que habla español pero no. /pero no/ Y XY tampoco. No habla.	poquito			ito	ito	no	ADV	1c
	f						Entiende un poquito [español], yo creo, XY [nombre].	poquito			ito	ito	no	ADV	1c
	f						Y mam-, mi mamá no traba-. Pues, sí trabajó un poquito fuera de la casa. Um, hacía, uh, (CC) housekeeping /mhm/ para una señora más, más, uh (…) Más grande en edad.	poquito			ito	ito	no	ADV	1c
	f						Um, Sebastián [ciudad]. Yo creo (…) Cerquita de allí porque mi, mi tía todavía vive allí.	cerquita			ito	ito	no	ADV	1c
	f						Parte de México, no sé. /ah/ Porque está bien cerquita del, del um, /sí/ de México /uh huh/ cuando vivían ellos allí /porque, sí/ XXX.	cerquita			ito	ito	no	ADV	1c
	f						Porque mi, mi abuela de mi, um, en lado de mi papá, uh, ella vivía en Brownsville (PI). /mhm/ Uh, y, allí es /XXX/ XXX cerquita de. So pueda ser que ellos v- vinieron de México.	cerquita			ito	ito	no	ADV	1c
	f						Allí estaban cerquita [de otra ciudad]. No sé. /mhm mhm/ (…) Y en esos tiempos /sí/ XXX pienso yo que no era como ahora con XXX. /XXX/ Tienes que pasar por, por Garita y eso	cerquita			ito	ito	no	ADV	1c
	f						Porque um, como di- como dije, los- mis abuelos en el lado de mi papá, ellos vivían en Tejas /mhm/ cuando yo es- yo era chiquita so. /mhm/ Cuando íbamos a, a visitarlos allí, es donde íbamos.	chiquita		child	ito	ito	no	ADJ	2a
	f						Y, um, yo quería estar más cerquita de ella /mhm/, de XY para ayudarle y, y ya tenía a, a mi nieto, mi nieto, sí. /mhm/ (CC) Grandchild /mhm/ [risas].	cerquita			ito	ito	no	ADV	1c
	f						So es lo que estaba haciendo ahorita y luego, como unos proyectos uh terminaron y no van a, no van a seguir, tenemos que. Uh las personas que están en es-, en ese proyecto tenemos que ponerlos en otro /hm/.	ahorita			ito	ito	lex	ADV	ex
	f						Pues, en, en eso tiempo pudíamos (CC) ya know andar en, en el barrio sin, sin apuro. Um, íbamos al parque porque estaba cerquita.	cerquita			ito	ito	no	ADV	1c
	f						De vez en cuando cuándo estaban chiquitos íbamos a, a, um. Salíamos l- a la, al, la laguna o algo asina.	chiquitos		child	ito	ito	no	ADJ	2a
	f						No y um venimos un poquito después de, cuando tuvieron las cinco personas que, que habla XY [risas].	poquito			ito	ito	no	ADV	1c
	f						Me gusta mucho ir a, como San Diego y, y me gusta ir mucho allí, so. /pues/ Está cerquita del mar y, y mirar la agua.	cerquita			ito	ito	no	ADV	1c
	f						Me gustaría viajar más cerquita, o sea uh para el norte de Arizona. /mhm/ Allí cae nieve también. [risa]	cerquita			ito	ito	no	ADV	1c
	f						Siempre están hablando y esa señora que pasó ahorita también habla español.	ahorita			ito	ito	lex	ADV	ex
	f						Estaba confundida un poquito, pero, no me asustó. /¿no?/ No. Uh uh. [risa]	poquito			ito	ito	no	ADJ	1c
	f						Pues, um (…) Estaba chiquita la niña porque entonces en febrero es cuando venimos a Tucson (PI). /mhm/	chiquita		child	ito	ito	no	ADJ	2a
CESA004	f	20 - 29	BA/BS in process	US	Mexico	US	pero lo extrañaba porque mm estaba muy a gusto, estoy a gusto, y ahorita, pues, no sé, para mí la mi cosa favorita de Tucsón es tan fácil es irte en bicicleta si quieres irte para allá,	ahorita			ito	ito	lex	ADV	ex
	f						Me gusta ver muchas películas /[tos]/ aunque ahorita no tengo mucho tiempo, pero (…) durante el verano me la paso viendo puras películas.	ahorita			ito	ito	lex	ADV	ex
	f						[¿Lees mucho en español? Mm sí, pues ahorita por la escuela, sí.	ahorita			ito	ito	lex	ADV	ex
	f						Like (PE) y todo, luego si yo pongo ahorita pa una noche ardiente todo el mundo va a decir, ‘¿qué es eso?’ ” /[tos]/ ¿XXX poniendo eso? /[tos]/ Cosas así ocurrentes se me hacen chistosos.	ahorita			ito	ito	lex	ADV	ex
	f						Sí sí sí. /[risa]/ Y pues ahorita ya (…) no sé, no sé, si salimos aquí, a fiestas o algo, pero /mhm/ en la casa de alguien.	ahorita			ito	ito	lex	ADV	ex
	f						el chofer no sé por qué decidió estacionarse en la pura orillita de-- de un cerro	orillita			ito	ito	no	N	1a
	f						para abajo era un hoyo grandote /aha/ y ahorita si se voltea el camión yo no sé qué voy a hacer, voy a pegar yo primero y /XXX/ adiós XY, y ya	ahorita			ito	ito	lex	ADV	ex
	f						una señora que vive en frente se la pasa trabajando, /aha/ enseguida viven unos viejitos /aha/ mm al otro lado viven unos estudiantes pero todo como que todo el mundo muy antisocial	viejitos			ito	ito	no	N	3a
	f						Y pues ya. Pues ahorita pues español [sólo hablo español en este momento]	ahorita			ito	ito	lex	ADV	ex
	f						O sea, ahorita yo te puedo hablar en español, pero (CC) and then I can change it to English /aha/ (CC) eso sería bilingüe.	ahorita			ito	ito	lex	ADV	ex
	f						pues aquí en Tucson, creo que la mayoría de lugares, pues sí, el-- el inglés, pero creo que poco a poquito se están acomodando a toda la gente que vive aquí, y a los turistas que vienen para hablar el español.	poquito			ito	ito	lex	ADV	ex
	f						[ ¿quieres decir en tu casa con tus, en la casa en que vives ahora?/] En que vivo ahorita.	ahorita			ito	ito	lex	ADV	ex
CESA005	f	20 - 29	BA/BS in process	US	Mexico	US	Son de México, uh-huh, de Saric, es un pueblito chiquito en Sonora, México, um, pero toda la- la mayoría de su familia están en los Estados Unidos ahora.	pueblito			ito	ito	no	N	1a
	f						Son de México, uh-huh, de Saric, es un pueblito chiquito en Sonora, México, um, pero toda la- la mayoría de su familia están en los Estados Unidos ahora.	chiquito		size	ito	ito	no	ADJ	1a
	f						Tengo unos amigos que viven cerquita, pero la mayoría de ellos viven un poco, mm, más afuera de dónde yo vivo.	cerquita			ito	ito	no	ADV	1c
	f						Con trafico, y con todas las escuelas que tengo que, um, que pasar por los- cuando tienes que, um, manejar despacito, um, me toma una hora.	despacito			ito	ito	no	ADV	1c
	f						Sí. Tengo una lo- relación muy cerquita con él. Es /bien/ mi mejor amigo.	cerquita			ito	ito	no	ADV	1c
CESA006	f	40 - 49	Associates	US	Mexico	US	N:o sé cómo se llama el pueblo, pero en Chihuahua, México. /okey/ Es un pueblo chiquito. Ni está en una mapa.	chiquito		size	ito	ito	no	ADV	1a
	f						Mhm, inglés nomás. Está aprendiendo español (…) despacito, pero, allá va.	despacito			ito	ito	no	ADV	1c
	f						Pero ahora sí, la- la gente del país puede, um, conocer el Romney, cómo es de verdad, no como:, nomás los pedacitos que tienen en las, en los reportes, ah-ahora el país pueden mirar [suena el teléfono] quién es el Romney.	pedacitos			ito	ito	no	N	1a
	f						o si vas para Europa o /mhm/ Australia (PI), New Zealand (PI), por donde quiera, cuando hablan inglés, es un poquito diferente.	poquito			ito	ito	no	ADJ	1c
	f						Uh, cada día xxx algo nuevo. Esta semana que, um (…) Ah, ahora, ya hace como dos semanas que uh, cuando yo lavo los trastes, ella agarra su banquecito y: me- me ayuda /[risa] qué lindo!/	banquecito			ito	cito	no	N	1a
	f						y yo creo que eso es lo que necesitamos ahorita porque este país está muy (…) cómo se dice, segregado, /uhu/ en grupos,	ahorita			ito	ito	lex	ADV	ex
	f						Pues, hace- ahorita no hacemos mucho porque: andamos de regresar a la escuela, (…) um, /xxx/ y luego con la niña, pero nos gustamos, ah, a veces, miramos televisión no mucho, hay unos dos, tres shows (PI) que nos gustamos,	ahorita			ito	ito	lex	ADV	ex
	f						Ahorita yo soy el único en el estado que pueda, que pueda hablar español en la compañía.	ahorita			ito	ito	lex	ADV	ex
	f						tenemos el, cómo se dice, recepción? /mhm/ Uh, poquito después, y luego nos sellamos en el templo.	poquito			ito	ito	no	ADV	1c
	f						[¿No cantas bien?] Ah, poquito, pero mi esposa canta como: un pájaro, muy, muy bonito, muy bonito. Me gusta mucho escucharla cuando canta.	poquito			ito	ito	no	ADJ	1c
	f						O ahora, yo, que- me recuerdo un tiempo, mi papa me compró un radio chiquito, NUEVO, y agarré un desarmador, y lo abrí, y se me perdieron los tornillos, y se enojó mucho mi papa.	chiquito		size	ito	ito	no	ADJ	1a
	f						Sí, well (PI), yo estaba en construcción por un ratito /uhu/, cuando yo estaba en colegio.	ratito			ito	ito	no	N	1c
	f						Um, es que las compañías grandes compran las chiquitas y luego, uh, no sé, (CC) they absorb them.	chiquitas		size	ito	ito	no	ADJ	1a
	f						Pues, después de un ratito, uh, se fijó, uh, los managers (PI) que yo no era landscaper (PI) y tenían que:, ah, cortar gente.	ratito			ito	ito	no	N	1c
	f						Cada vez que yo vendo algo, gano muy poquito, pero luego le dan a mi supervisor	poquito			ito	ito	no	ADV	1c
	f						y luego le dan un poquito a el-el supervisor de él, y- /mhm/ y eso, yo.	poquito			ito	ito	no	ADV	1c
	f						después le quitaron el tubo, con una: botella chiquito, y luego, poquito, poquito graduó.	chiquito		size	ito	ito	no	ADJ	1a
	f						después le quitaron el tubo, con una: botella chiquito, y luego, poquito, poquito graduó	chiquito		size	ito	ito	no	ADJ	1a
	f						Porque los que nomás trabajan por un ratito es, es uh (CC) temporary work,	ratito			ito	ito	no	N	1c
	f						Aquí en Tucsón. (...) /Uh/ Un ratito en Nuevo México, pero ma- mayoridad aquí en Tucsón	ratito			ito	ito	no	N	1a
CESA007	m	20 - 29	BA/BS in Process	US	Mexico	Mexico	Ah, pues es un pueblo [sh]iquito, la de XY. Eh ah (…). Pues to(do)- mm to(do) pasa en la plaza	[sh]iquito		size	ito	ito	no	ADJ	1a
	m						Es XY. Y es un pueblo muy [sh]iquito.	[sh]iquito		size	ito	ito	no	ADJ	1a
	m						Pues como es un pueblo [sh]iquito, no- no hay mucho turismo pero también.//	[sh]iquito		size	ito	ito	no	ADJ	1a
	m						O sea que, [gente hablando en el fondo] pué(s) no sé mucho d- de México, menos que (…) que es un- una parte: muy [sh]iquita [donde está el pueblo]	[sh]iquita		size	ito	ito	no	ADJ	1a
	m						Y era una (…) es una, era una escuela muy [sh]iquita	[sh]iquita		size	ito	ito	no	ADJ	1a
	m						Ayudar y protejar la personas. /mm/ Y eso es una cosa desde sh-cuando yo era [sh]iquito, /¿sí?/ me gustaba.	[sh]iquito		child	ito	ito	no	ADJ	2a
CESA009	f	Under 20	BA/BS in Process	US	Mexico	Mexico	Mmhm pues no me acuerdo nada [risa] estaba muy chiquita.	chiquita		child	ito	ito	no	ADJ	2a
	f						Si, um fui a XY Middle School. (PI) Y pues esta cerquita también de aquí.	cerquita			ito	ito	no	ADV	1c
	f						Si, esta bien suave. Mi- mi abuelita /mmhm/ pues ella vive allá en México y /mmhm/ y ella tiene un rancho /mmm/ pero hace mucho que no voy para allá [risa] /mmm/ Quiero ir otra vez. /pues sí/ Mmhm.	abuelita			ito	ito	no	N	2a
	f						Hmmm pues primero vivimos en una casa pero no me acuerdo porque estaba muy chiquita /mmm/ y luego nos fuimos para la California y cuando regresamos um (…) rentamos un apartamento y estuvimos ahí no sé cuanto- cuantos años	chiquita		child	ito	ito	no	ADJ	2a
	f						Sí, sí. Eh y- y yo también era así pero /mmhm/ cuando era más chiquita y luego ahora “no, quiero vivir con mis papás.” [risa]	chiquita		child	ito	ito	no	ADJ	2a
	f						Ah pues mi mam- mi papá umm está trabajando ahorita en la en la mina.	ahorita			ito	ito	lex	ADV	ex
	f						[mi mamá] dejo de trabajar porque adoptamos a- a dos cuates. Y so (PI) los tá cuidando ahorita.	ahorita			ito	ito	lex	ADV	ex
	f						de mi (..) de mi papá/mmhm/ sus papás, ellos están viviendo en California ahorita y luego los papás de mi mamá están viviendo en Phoenix	ahorita			ito	ito	lex	ADV	ex
	f						No: pues antes sí /mmhm/ porque: porque pues estaba: um mi: abuelita eh que vive en Phoenix pues ellos vivían allá en México	abuelita			ito	ito	no	N	2a
	f						pero luego ya que se vinieron todas las hermanas también se vinieron y so (PI) ahorita están viviendo allá [en Phoenix]	ahorita			ito	ito	lex	ADV	ex
	f						Mis hermanos. Sí, eh pues el más chiquito el que está freshman (PI) él si juega pero (..)	chiquito		child	ito	ito	no	ADJ	2a
	f						pues también la moda y todo eso /[risa]/ la sie- la sociedad los hace (…) medios (..) loquitos	loquitos			ito	ito	no	ADJ	3a
	f						Y ah- orita siento eso con- con mis papás porque pues ya- pues ya nosotros ya estamos grandes so ya están acostumbrados que ya nosotros podamos hacer todo nosotros	ahorita			ito	ito	lex	ADV	ex
	f						[El iformante tienen trabajo a las 12 pm] Mmm pues un- puedo llegar un poquito más tarde pero.	poquito			ito	ito	no	ADV	1c
	f						Sí, estoy trabajando ahorita (CC) in the XY Building, allá cercas del XY.	ahorita			ito	ito	lex	ADV	ex
	f						ya deje de hable- de hablar español a menos que fuera con mis abuelitos que no hablan (..) no hablan pues nada de inglés	abuelitos			ito	ito	no	N	2a
	f						[informante quiere traducir de inglés a español en su comunidad] Um, pues, no, no sé, para, para sí, para una comunidad chiquita o grande	chiquita		size	ito	ito	no	ADJ	1a
CESA011	f	Under 20	BA/BS in Process	US	Mexico	US	Y ahorita no me gustan las clases que estoy tomando. Que fue de enfermería, también trabajando, porque fue mucho para mí,	ahorita			ito	ito	lex	ADV	ex
	f						nos gustaba tener nuestro, nuestro: gatitos, o nuestros perritos.	gatitos			ito	ito	no	N	1c
	f						nos gustaba tener nuestro, nuestro: gatitos, o nuestros perritos [repetida]	perritos			ito	ito	no	N	1c
	f						[informante habla de su amiga] Y después ya:, e:n la pre:pa la vi un poquito más, como, una: o dos veces cada año pero al- ni tanto.	poquito			ito	ito	no	ADV	1c
	f						Y:, ahorita no estoy muy segura, pero sí me gusta:. Como antropología es el estudio de personas, /	ahorita			ito	ito	lex	ADV	ex
	f						Ahorita estoy tomando una clase de religión.	ahorita			ito	ito	lex	ADV	ex
	f						Ah, no:. Ahorita no, a, e, cuando, ah estaba chica, fui católica /mhm/ pero no me gustaba, xxx	ahorita			ito	ito	lex	ADV	ex
	f						Sí, y como ahorita no voy a la escuela pero ahora con mi clase de religión, estoy a:, aprendiendo más,	ahorita			ito	ito	lex	ADV	ex
	f						Sí, muy agradacida de todo lo que semos, y que, sí ella estaba: en (CC) Jesuralem horita, porque vino para acá, para visitar a tu, a sus nietos	ahorita			ito	ito	lex	ADV	ex
	f						y como estaban más: mayores que yo, /sí/ como mi hermano ahorita, como trei-, creo que treintas, cerca de treinta años,	ahorita			ito	ito	lex	ADV	ex
	f						pero ahora tengo mi pr-, mi pro- propio apartamento con, con mi amiga, /mhm/ y ahí tenemos um, mi perrito.	perrito			ito	ito	no	N	1c
	f						Am, se llama bolen /¿bolen?/ aha, [risas] y bien curiosito [ el perro]	curiosito			ito	ito	no	ADJ	1c
	f						So ahorita, ah:m, pues ya fue mi amiga antes, una de mis mejores amigas.	ahorita			ito	ito	lex	ADV	ex
	f						le:s enseñaría, porque es más fácil enseñar a alguien cuando están más chiquito:s /	chiquitos		child	ito	ito	no	ADJ	2a
	f						[informante se refiera la preparatoria] Y como es bien chiquito:, como, todos saben si estabas /ah:/ con alguien.	chiquito		size	ito	ito	no	ADJ	1a
	f						Y si tenemos extra, no:s, a- hacen, lo usan para mejorar el hospita:l, o no usan un poco de, de dinero un poquito más.	poquito			ito	ito	no	ADV	1c
	f						Ah:m, (...) pue:s, la veo los fin de semanas como me quedo ahí, y ahorita estoy ahorrando para agarrar un carro.	ahorita			ito	ito	lex	ADV	ex
	f						estoy ahorita en un buen humor y quiero mejorar mi humor con, con, ahm, música	ahorita			ito	ito	lex	ADV	ex
	f						Pues yo estoy: ahorita: (...) Tengo como cuatro de español [risas] así que: /oh/ porque es mi:, es mi:, carrera	ahorita			ito	ito	lex	ADV	ex
CESA013	f	30 - 39	BA/BS	US	Mexico	Mexico	Mis papás son de Sonora. Mi papá es de: ah: de Nogales Sonora pero no de la ciudad más como de los ranchitos.	ranchitos			ito	ito	no	N	1a
	f						Es un- son unos ranchitos que se llaman, el que le dicen el Arizón el Sarik.	ranchitos			ito	ito	no	N	1a
	f						Por ejemplo, conozco a varias personas que son de: de algunos (..) por ejemplo, eh ranchitos como como de: (...) Tubutama	ranchitos			ito	ito	no	N	1a
	f						Más yo uff yo la verdad yo creo que cuando estaba bebita, iba para'ya, pero umm no me acuerdo ni la última vez que fui,	bebita	child		ito	ito	no	N	2a
	f						Um, Y de eso sí tengo muchos recuerdos porque pues cada años íbamos de chiquitos al a visitar a mis abue- a mis abuelos	chiquitos		child	ito	ito	no	ADJ	2a
	f						um, pero sí, tienen dos hijos /xxx/ dos niños, tengo dos sobrinitos. Um XY y XY.	sobrinitos	child		ito	ito	no	N	2a
	f						um, pero sí, tienen dos hijos /xxx/ dos niños, tengo dos sobrinitos. Um XY y XY. Están chiquitos, tienen cinco, seis años	chiquitos		child	ito	ito	no	ADJ	2a
	f						Ahorita estoy trabajando en una escuela de los ciegos y los mudos.	ahorita			ito	ito	lex	ADV	ex
	f						Tengo como (...) pues desde que se murió (...) mi abuelita	abuelita			ito	ito	no	N	2a
	f						desde que se murieron mi abuelitos no regreso [a México]	abuelitos			ito	ito	no	N	2a
	f						Ay pues la verdad um: (...) no /no/ Pues antes decía que era demócrata pero pues ahorita diría que soy nada. [se ríen los dos] /um ok/	ahorita			ito	ito	lex	ADV	ex
	f						Tiene- tiene ahorita tiene sesenta y ¿qué? sesenta y dos años.	ahorita			ito	ito	lex	ADV	ex
	f						Ay me encantaba ir a Me- a México porque era en el campo o sea mis abuelitos eran campesinos	abuelitos			ito	ito	no	N	2a
	f						um mi abuelito era: el que el encargado de las milpas,	abuelito			ito	ito	no	N	2a
	f						Ah tenían cochis mis abuelitos, entonces ah: había también mmm(...) ¿Ay, cómo se llaman?	abuelitos			ito	ito	no	N	2a
	f						mi abuelito nos nos llevaba um a otros campos a mí y a mi hermano	abuelito			ito	ito	no	N	2a
	f						y a mi primito en el tractor.	primito	child		ito	ito	no	N	2a
	f						Entonces ahí estoy ahorita porque pues también estoy pensando como te dije anteriormente que quiero entrar al a la escuela otra vez, entonces me está ayudando mucho mi mamá ahorita.	ahorita			ito	ito	lex	ADV	ex
	f						como te dije anteriormente que quiero entrar al a la escuela otra vez, entonces me está ayudando mucho mi mamá ahorita.	ahorita			ito	ito	lex	ADV	ex
	f						But if it was my choice (CC) [truena los dedos] me voy ahorita /aww que triste/ [se ríe P] Sí es que, ay, esta generación	ahorita			ito	ito	lex	ADV	ex
	f						Pues cuando estaba chiquita no me acuerdo que había tanto lío, tanta bronca, y ahora ahora lo veo más.	chiquita		child	ito	ito	no	ADJ	2a
	f						O tal vez, siempre sí estaba pero yo estaba tan chiquita que ni lo percebía.	chiquita		child	ito	ito	no	ADJ	2a
	f						llegó aquí a Tucson cuando tenía veinti: veintiuno, algo así. Veinte o veintiuno y ahorita tiene treinta y tres.	ahorita			ito	ito	lex	ADV	ex
	f						ya tenía aquí varios años así que entonces ya estaba un poquito fama- familiarizado con la cultura mexicana.	poquito			ito	ito	no	ADJ	1c
	f						Um, ahora cuando nos íbamos a la ciudad, porque mis padres o mis abuelitos estaban como a media hora de de la ciudad,	abuelitos			ito	ito	no	N	2a
	f						. Y um, pero sí, tienen dos hijos /xxx/ dos niños, tengo dos sobrinitos.	sobrinitos	child		ito	ito	no	N	2a
	f						Um XY y XY. Están chiquitos, tienen cinco, seis años, ¿cuántos años tiene el XY?	chiquitos		child	ito	ito	no	ADJ	2a
	f						Éramos todos los niños del barrio, pero más eran con con él y sus amigos. Porque yo era una tomboy (PI) cuando era cuando era chiquita.	chiquita		child	ito	ito	no	ADJ	2a
	f						sí yo creo que hoy hay más gente bilingüe que lo había cuando yo estaba chiquita, pero como te digo a la vez	chiquita		child	ito	ito	no	ADJ	2a
	f						Entonces a mí me gustaba eso de (...) Sí jugaba las muñequitas, pero me gustaba más de irme de bicicleta,	muñequitas			ito	ito	no	N	1c
	f						And we did have our moments, too (CC) cuando nos peleábamos, o o luchábamos. Um (...) Cositas así, pero no, nada nunca grave.	cositas			ito	ito	no	N	1b
	f						me acuerdo de una vez que yo y una amiga fuimos a Hermosillo […]Y ella, pues ella es morenita con pelo oscuro	morenita			ito	ito	no	ADJ	3a
	f						Y pues yo creo que estaba tratando de ver si ella fallaba en algún lugarcito.	lugarcito			ito	cito	no	N	1c
	f						somos así medias [w]eras, that are light-skinned, light-hair, the only ones. Everyone else (CC) son morinitos,	morinitos			ito	ito	no	ADJ	3a
	f						Obregón, de de pueblo yaquí que está muy cerquita de Obregón, de Navojoa.	cerquita			ito	ito	no	ADV	1c
	f						o. Con- conozco a una cubana, a unas cuantas, a una cubanita por ahí que que no sé. Nunca nunca le he caído y yo no la conozco la verdad	cubanita			ito	ito	no	N	2b
	f						yo le hablaría en español, aunque tal vez sí sería um: un poquito difícil no, porque si la si mi pareja pues no entiende el español	poquito			ito	ito	no	ADJ	1c
	f						[informante habla de una cirugía para los ojos] creo que me va a costar un poquito más.	poquito			ito	ito	no	ADV	1c
CESA016	f	20 - 29	High School	US	Mexico	Mexico	Yo digo desde chiquita con su papá. Pero ella- su papá ni su mamá era mexicano (..) era irlandés.	chiquita		child	ito	ito	no	ADJ	2a
	f						Quizá de eso la niña ha salido así con el pelito rubio, ¿no?	pelito			ito	ito	no	N	1c
	f						Pero (…) me dio más interés (…), y desde chiquita siempre había dicho curiosamente que yo quería ser chef.	chiquita		child	ito	ito	no	ADJ	2a
	f						Y como está tan feo México ahorita con la situación	ahorita			ito	ito	lex	ADV	ex
	f						ella siempre tenía-mantenía la casa tan limpiecita	limpiecita			ito	cito	no	ADJ	1c
	f						Y la cena, pues cenan muy liviano, algo, cualquier cosita.	cosita			ito	ito	no	N	1b
	f						Ibas a la casa de enseguida, estaban haciendo lo mismo, na más cambiaban una cosita.	cosita			ito	ito	no	N	1b
	f						No, era muy chiquito, no caminaba todavía, pero sí me lo llevaba para donde sea. (…)	chiquito		child	ito	ito	no	ADJ	2a
	f						Y le encantaba y las acariciaba como si fueran un perrito [informante habla de las gallinas]	perrito			ito	ito	no	N	1b
	f						y jugaba allá a las muñecas y así. (…) XY es muy diferente, es más mujercita.	mujercita			ito	ito	no	N	3a
	f						sí es especialmente porque no puedo llevarme el- la- la tarea al trabajo.. porque como ahorita estoy tomando dos clases para mi minor,	ahorita			ito	ito	lex	ADV	ex
CESA018	f	20 - 29	BA/BS in Process	US	Mexico	Mexico	pero no contestaba mu:cho, nomás hablaba un poquito /ah/ y luego me decían “¿puedes elaborar?”[en tus ensayos/escritura]	poquito			ito	ito	no	ADV	1c
	f						Sí extraño los niños y me dicen… mi novio y no- estaba trabajando con un niño que está chiquito, tenía como cuatro años	chiquito		child	ito	ito	no	ADJ	1c
	f						[el novio] desde el principio fue bien serio- así bien en serio porque: pues ya estábamos un poquito- ya no estábamos tan, tan niños ya	poquito			ito	ito	no	ADJ	1c
	f						no (…) nomás estaba trabajando allá, con su- creo nada más con su papá, ya también mi abuelito,	abuelito			ito	ito	no	N	2a
	f						ya pues empezamos a compra:r (…) y: en un ratito: mu:chísimas teníamos (…) y: sí nos gusta mucho la película de terror	ratito			ito	ito	no	N	1c
	f						ya me estoy haciendo viejita	viejita			ito	ito	no	ADJ	3a
	f						pero en cuanto llegamos a su casa fue a por su amiguito	amiguito			ito	ito	no	N	2a
	f						ya luego cuando me salí ya ahorita nomás quiero terminar así que no, ya no tengo tiempo	ahorita			ito	ito	lex	ADV	ex
	f						ya no tengo tiempo pero: sí ya alcancé un poquito, como e:l idioma [el fancés]	poquito			ito	ito	no	ADV	1c
	f						estaba ya en otro muy-más retiradito y no había casas cuando nos fuimos a vivir para allá,	retiradito			ito	ito	no	ADJ	1c
	f						pues en el sur, siempre /aham/ estás impuestos a que: ahí las tienditas así como: hay pues en la- por la seis, no se si has ido, muy mexicanas las tienda	tienditas			ito	ito	no	N	2a
	f						cuando íbamos en navidad nos llevábamos como libritos	libritos			ito	ito	no	N	1c
	f						ues sí: se compara y de este: ellos se enseñaban los libri:tos y así las histó:rias y tod	libri:tos			ito	ito	no	N	1a
	f						Y mi mamá antes estaba trabajando: tenía como un carrito de comida que llevaba	carrito			ito	ito	no	N	1c
CESA020	f	20 -29	BA/BS in Process	US	Mexico	Mexico	o sea, de chiquitos, todos están sucios, porque, a los- a los cinco años todos se meten en la tierra y así juega	chiquitos		child	ito	ito	no	ADJ	1c
	f						Desde que era chiquitita. Me compraba los zapatos cada año de la escuela.	chiquitita		child	ito	ito	no	ADJ	2a
	f						Con una estrellita y con (...) ah: cómo /¿listones?/ sí, listones rositas	estrellita			ito	ito	no	N	1c
	f						Con una estrellita y con (...) ah: cómo /¿listones?/ sí, listones rositas	rositas			ito	ito	no	ADJ	1c
	f						no me sorprendería que hubiera hombres un poquito más mayores buscando chavas de doce años.	poquito			ito	ito	no	ADJ	1c
	f						Y: su hermana era: unos cuantos años mayor, que él, XY estaba en mi clase, éramos de la misma edad. Y era chiquito, y era muy atlético	chiquito		size	ito	ito	no	ADJ	2a
	f						Aunque era mayor ella, ella siempre como lo protegía y él era chiquitito, era más chaparro que yo	chiquitito		size	ito	ito	no	ADJ	2a
	f						Pero él era más chiquito y era, bueno, tenía una vocecita así chiquita. Por eso creo podía hacer las vueltas en el aire	chiquito		size	ito	ito	no	ADJ	1c
	f						Pero él era más chiquito y era, bueno, tenía una vocecita así chiquita. Por eso creo podía hacer las vueltas en el aire [repetida]	vocecita			ito	cito	no	N	1a
	f						Pero él era más chiquito y era, bueno, tenía una vocecita así chiquita. Por eso creo podía hacer las vueltas en el aire [repetida]	chiquita		size	ito	ito	no	ADJ	1c
	f						Siempre tenían los zapatos li:mpios. Y, escribían así, escribían de forma: legible. Así como tú, chiquito	chiquito		size	ito	ito	no	ADJ	1a
	f						Ella creció: en (...) en una casa con poquito más. (...) Y: (...) ay, no sé.	poquito			ito	ito	no	ADV	1c
CESA021	m	20 - 29	BA/BS in Process	Mexico/raised in US	Mexico	Mexico	no es muy grande pero no es chiquito sino igual como México.	chiquito		size	ito	ito	no	ADJ	1a
	m						a la muchacha con la que ando ahorita la conozco desde que yo tenía unos dos años más o menos	ahorita			ito	ito	lex	ADV	ex
	m						lo primero que te ofrecen “hey, ¿quieres un cafecito, o quieres?	cafecito			ito	cito	no	N	2a
	m						Por ejemplo, como yo empecé tan chiquito, conmigo todo el tiempo fueron muchas	chiquito		child	ito	ito	no	ADJ	2a
	m						Y como yo y mi hermano (...) m- mas chiquito, o sea, todo el tiempo estuvimos dedicaos	chiquito		child	ito	ito	no	ADJ	2a
	m						Tengo amigos que, por ejemplo, de chiquitos vivieron aquí ya de más grandes se tuvieron que ir a México:	chiquitos		child	ito	ito	no	ADJ	2a
	m						Pero uno más de chiquito como a la (…) como que a veces no piensa las cosas	chiquito		child	ito	ito	no	ADJ	2a
	m						uno a veces hace las cosas no porque sea de chamaquito chiquito, sino porque les gusta hacerlas.	chamaquito	child		ito	ito	no	N	2a
	m						uno a veces hace las cosas no porque sea de chamaquito chiquito, sino porque les gusta hacerlas.	chiquito		child	ito	ito	no	ADJ	2a
	m						es mejor parar y tratar de hacer las cosas un poquito diferente	poquito			ito	ito	no	ADV	1c
	m						Uh, yo por ejemplo, ahorita en el trabajo que estoy ahorita me levanto (…)	ahorita			ito	ito	lex	ADV	ex
	m						por tratar de convivir un poquito más (..)	poquito			ito	ito	no	ADV	1c
	m						pero, pero de poquito a poquito la XY me ha metido que Dexter (PI) que cosas diferentes	poquito			ito	ito	no	ADV	1c
	m						De que usualmente la gente que tiene carros más, más feito:s.	feito:s			ito	ito	no	ADJ	2b
	m						Usualmente la gente [risa] con los carritos mas feitos, son la gente que son la gente más especial	feitos			ito	ito	no	ADJ	2b
	m						NO. “¿Un cafecito?” Bueno, dame un café? Salió el señor.	cafecito			ito	ito	no	N	2a
	m						El trabajo donde estoy ahorita es bien pagado, y no es muy matado	ahorita			ito	ito	lex	ADV	ex
	m						me gusta aprender las cosas, y saber un poquito de todo.	poquito			ito	ito	no	ADV	1c
	m						Y tratar de, de saber un poquito te todo.	poquito			ito	ito	no	ADV	1c
	m						Cuando el cliente te veo no más te pone un poquito más nervioso,	poquito			ito	ito	no	ADJ	1c
	m						yo y mi hermano menor somos más capaces de, de agarrar carritos que, que no sirvan muy bien	carritos			ito	ito	no	N	1b
	m						Eh, yo, yo aprendí en u:n, en, e:n una troquita, en una Datsun	troquita			ito	ito	no	N	1a
	m						una troquita, en una Datsun /una Datsun?/ una viejita.	viejita			ito	ito	no	ADJ	1c
	m						Incluso, en el trabajo, en le trabajo que yo tengo ahorita, ellos, te, te enseñan	ahorita			ito	ito	lex	ADV	ex
	m						ay si afuera de que yo me recuerde de sueños ahorita no, no, /no/ no me recuerdo	ahorita			ito	ito	lex	ADV	ex
	m						yo cuando empecé a ver partidos de fútbol de chiquito	chiquito		child	ito	ito	no	ADJ	2a
	m						Llegas a pueblitos a veces (..) no hay ni, ni pavimento en las calles.	pueblitos			ito	ito	no	N	1a
	m						las cosas de poquito a poquito se fueran arreglando.	poquito			ito	ito	no	ADV	1c
	m						NO, o sea, las cosas no van a cambiar (...) ni ahorita ni en diez años	ahorita			ito	ito	lex	ADV	ex
	m						Ese polecía ahorita se va a dar la vuelta y nos va a parar	ahorita			ito	ito	lex	ADV	ex
	m						"Pero yo te voy a decir cuando me los des porque ahorita va pasando un carro."	ahorita			ito	ito	lex	ADV	ex
	m						que te saca por- por haz de cuenta cerquita de Rocky Point.	cerquita			ito	ito	no	ADV	1c
	m						cuando me pongo nervioso /aja/ empiezan a salir un poquito los acentos.	poquito			ito	ito	no	ADV	1c
	m						Por ejemplo, por un poquito sí [salen los acentos], por lo mismo de que yo no- no- no nací.	poquito			ito	ito	no	ADV	1c
	m						Si hablan bajito, si hablan más fuerte. Si- si- si qué tipo de palabras usan.	bajito			ito	ito	no	ADJ	1c
	m						a él sí se le nota un poquito más el acento	poquito			ito	ito	no	ADV	1c
	m						Pero haz de cuenta, cada, cada partecita tiene sus, sus creencias.	partecita			ito	cito	no	N	1a
	m						O sea, todo es (…) poquito diferente	poquito			ito	ito	no	ADJ	1c
	m						Um, yo desde muy chiquito pa' decirte la verdad (...) como yo me acuerdo que vivíamos	chiquito		child	ito	ito	no	ADJ	2a
	m						y la vecina era una, una muchachita de nuestra edad, americana	muchachita	child		ito	ito	no	N	2a
	m						como que uno de chamaquito más rápido aprende las cosas	chamaquito	child		ito	ito	no	N	2a
	m						Cuando estas chiquito es cuando lo aprendes.	chiquito		child	ito	ito	no	ADJ	2a
	m						taba tan chiquito que no me acuerdo cuando yo aprendí inglés.	chiquito		child	ito	ito	no	ADJ	2a
	m						"¿Sabes qué no? ahorita tamos aquí en la casa vas hablar español".	ahorita			ito	ito	lex	ADV	ex
	m						NO, pues están muy pegaditos la cultura y el lenguaje de ahora.	pegaditos			ito	ito	no	ADJ	2a
CESA022	f	20 - 29	BA/BS in Process	US	Mexico	Mexico	Y allí, ehm, le han hecho como un recuerdito.	recuerdito			ito	ito	no	N	1c
	f						Y entonces, ir a estudiar y tener que estudiar horas y horas y horas, pues, se me [risas] hace me un poquito más fácil	poquito			ito	ito	no	ADJ	1c
	f						Pero se, se lastimó tanto que el dedo se le cortó y lo tenía colgando como por un hilito el dedo.	hilito			ito	ito	no	N	1a
	f						para las solicitudes de la universidad y todo eso. Y siempre me la hacía, um, muy de cuadritos. Va ser difícil. “Ah, que tienes que hacer esto y esto.”	cuadritos			ito	ito	no	N	3b
	f						Y, pues, él trabaja ahorita como, como monitor en la XY.	ahorita			ito	ito	lex	ADV	ex
	f						si/ que era un poquito, perdón, un poquito más importante diría yo porque me calificaban en la gramática del inglés.	poquito			ito	ito	no	ADJ	1c
CESA023	f	20 - 29	Associates	Mexico	Mexico	US	Tampoco, /se propone/ no pone decoraciones, y cuando de chiquita le decía,	chiquita		child	ito	ito	no	ADJ	2a
	f						Y luego, así cosas chiquitas que me ponía a pensar. Ya no voy a poder hacer esto.	chiquitas		size	ito	ito	no	ADJ	1c
	f						era más fácil sacarle plática a alguien o tratar de conocer a la gente:. Y hacer un poquito más de plática.	poquito			ito	ito	no	ADV	1c
	f						Sí fuimos de junio a julio, un poquito más	poquito			ito	ito	no	ADJ	1c
	f						Mmm, un poquito más del año porque: nos juntamos	poquito			ito	ito	no	ADJ	1c
	f						Pero:: aun en las clases como horita tengo: tres cientos treinta y tres, y yo:: sé que sé más español	ahorita			ito	ito	lex	ADV	ex
	f						yo, me siento como un poquito: intimidada y me da vergüenza	poquito			ito	ito	no	ADJ	1c
	f						porque tengo dos hermanitas y ya veo que como ya ella ya es más gra:nde.	hermanitas	child		ito	ito	no	N	2a
	f						Ella las tuvo: a los treinta y tantos años ya, se me hace un poquito más floja.	poquito			ito	ito	no	ADJ	1c
	f						desde chiquita ella me empezó a enseñar a leer en el español::	chiquita		child	ito	ito	no	ADJ	2a
	f						Porque mi hermanita la más chiquita que tiene seis años	hermanita	child		ito	ito	no	N	2a
	f						Porque mi hermanita la más chiquita que tiene seis años	chiquita		child	ito	ito	no	ADJ	2a
	f						Y luego, de chiquita me daba mucho coraje que (…) ya no puedo pensar en un ejemplo.	chiquita		child	ito	ito	no	ADJ	2a
CESA024	f	20 - 29	BA/BS in Process	US	US	US	mi mamá ahorita trabaja con- con muchas compañías	ahorita			ito	ito	lex	ADV	ex
	f						Oh umm pues, voy a estudiar para ser una maestra de umm kindergarten (PI) hasta (CC) third grade, so Early childhood learning (CC) para niños chiquitos	chiquitos		child	ito	ito	no	ADJ	2a
	f						y ahorita no sé si voy a tener mi menor en, en español	ahorita			ito	ito	lex	ADV	ex
	f						creo que sí lo voy a hacer, desde ahorita (…) pero bilingual (PI) no más de estar tomando clases.	ahorita			ito	ito	lex	ADV	ex
	f						Pues, primero era español, pero ya cuando entré el kinder es cuando aprendí a hablar uh inglés, más, pero desde cuando estaba chiquita trató mi amá de umm enseñarme los dos, juntos, pero ya cuando fui a la escuela ya como se me olvidó el español.	chiquita		child	ito	ito	no	ADJ	2a
	f						pues fui a preschool (PI) primero y ahí en ese escuelita nos enseñaron los dos juntos	escuelita			ito	ito	no	N	1c
	f						Cuando estaba chiquita siempre estuve en clases como de um clases de honor como niños avanzados.	chiquita		child	ito	ito	no	ADJ	2a
	f						Sonora y allí viven todo y es como un pueblito	pueblito			ito	ito	no	N	1c
	f						pero siempre visito:, visito mi um mi familia en XY, Sonora y allí viven todo y es como un pueblito BIEN chiquitito fronta, junto a la frontera.	chiquitito		size	ito	ito	no	ADJ	1a
	f						Sí, tengo un- pues ahorita tengo un stepson (PI) [risas] /ah/ y yo trato de hablarle en inglés y en español.	ahorita			ito	ito	lex	ADV	ex
	f						sí me cansó con él, pero es- está en el (CC) terrible twos ahorita y siempre quiere jugando y brincando y nunca se quiere dormir	ahorita			ito	ito	lex	ADV	ex
	f						Ahorita no porque casi no sabe tanto	ahorita			ito	ito	lex	ADV	ex
	f						Todo ahorita es el no no y es porque siempre le decimos, “No, eso no no no, como eso no”	ahorita			ito	ito	lex	ADV	ex
	f						pues ya cuando estaba chiquito se vino acá a Tucson	chiquito		child	ito	ito	no	ADJ	2a
	f						Y yo creo que es una problema eso porque yo tengo hermanitas que ella- también ellas pura inglés.	hermanitas	child		ito	ito	no	N	2a
	f						Es como yo pero ellas casi no habla en español aunque necesita pero las otras tres chiquitas (…) pura inglés.	chiquitas		child	ito	ito	no	ADJ	2a
	f						Y ahora se mira abuelita y las otras dos, bien prietas con pelo chino bien oscuros piel ah oscuro pero aunque se miran mexicanas no hablan.	abuelita			ito	ito	no	N	2a
	f						Uhm cuando estaba chiquita era un tradición de ir a México.	chiquita		child	ito	ito	no	ADJ	2a
	f						pues cuando estaban chiquitos como yo eran catlóticos o catlóticas pero ehm aho- pues se se cambiaron el religión a cristiano.	chiquitos		child	ito	ito	no	ADJ	2a
	f						Y: y ahorita como:-estoy aprendiendo mucho	ahorita			ito	ito	lex	ADV	ex
	f						Sí uvas /uvas/ umm hmm sí yo siempre ehm pues cuando estaba chiquita no nos dejaron ni correr	chiquita		child	ito	ito	no	ADJ	2a
	f						Cuando estaba chiquita fuimos a México	chiquita		child	ito	ito	no	ADJ	2a
	f						nos vimos en la casa de mis tías y ellos adoptaron a mi tata de mi mamá cuando estaba chiquito porque su mamá como tenía muchas cosas que hace	chiquito		child	ito	ito	no	ADJ	2a
	f						Ahorita mi cumpleaños porque ten- agarro dinero [risas] de regalos.	ahorita			ito	ito	lex	ADV	ex
	f						Y como ella se parece más gringuita que todas,	gringuita			ito	ito	no	ADJ	2a
	f						y ahorita estoy planeado la de catorce años porque va cumplir quince en en un año en agosto que viene.	ahorita			ito	ito	lex	ADV	ex
	f						Uhmm (…) tengo, tengo muchas como uhm pues uno que me puso bien feliz es de mis hermanitas porque no sé es por- no s- mi nana y tata dicen por- es- la razón porque hizo que hizo mi hermana era porque yo estaba ahí.	hermanitas	child		ito	ito	no	N	2a
	f						él tenía que cuidar a mi otras dos hermanitas	hermanitas	child		ito	ito	no	N	2a
CESA025	f	Under 20	BA/BS in Process	US	Guatemala	US	No, no (…) no. No quiero hijos. /[risas]/ Ahorita no.	ahorita			ito	ito	lex	ADV	ex
	f						Uhm, pero pelean mucho, /oh/ y no sé si (…) ella no está pensando ahorita.	ahorita			ito	ito	lex	ADV	ex
	f						Y ahorita se va a graduar en mayo, y su novia viene, um, a la universidad también	ahorita			ito	ito	lex	ADV	ex
	f						muchas personas quieren nadar ahorita especialmente porque la el agua está calentado.	ahorita			ito	ito	lex	ADV	ex
	f						Y luego, ahorita están en Alemania y fueron a Italia /hm/ para ser maestros allí, y no sé qué.	ahorita			ito	ito	lex	ADV	ex
	f						Y luego cambié para tener español y estudios africanos, y ahorita la voy a cambiar otra vez	ahorita			ito	ito	lex	ADV	ex
	f						ELLA estaba muy preocupada porque (…) una gringuita en en Quesada,	gringuita			ito	ito	no	N	3a
	f						ELLA estaba muy preocupada porque (…) una gringuita en en Quesada, que es (…) es un, pueblito	pueblito			ito	ito	no	N	1a
	f						Entonces, um, ellos vienen, y entonces, es una (…) fiestecita como, con, veinte, treinta personas.	fiestecita			ito	cito	no	N	1b
	f						No, pues, la más chiquita, pero, mi- en mis amigos yo era má- la más um older, (PI) la más grande.	chiquita		child	ito	ito	no	ADJ	2a
	f						Y ahorita está un poco torcido, pero, pero allí vamos. Allí vamos.	ahorita			ito	ito	lex	ADV	ex
CESA027	f	20-29	BA	US	US	US	que son estúpidos y me siento un poquito estúpida,	poquito			ito	ito	no	ADJ	1c
	f						primero y segundo grado fui todo um enseñado en español y tercero, cuart- cuatro y quinto fue un un poquito mezclado de español y en ingles también.	poquito			ito	ito	no	ADJ	1c
	f						la única niña- persona en mis escuelas que no era mexicana, fue un, fui un poquito diferente	poquito			ito	ito	no	ADJ	1c
	f						So (PI) um, y creo que eso fui un poquito um diferente or (PI), um difícil para mi como decir a personas no no estoy como pretending	poquito			ito	ito	no	ADJ	1c
	f						Pero sí cosas como chistosos así pero en como en en vida y más grande no me pongo (..) un poquito nervioso	poquito			ito	ito	no	ADJ	1c
	f						Me pongo poquito asustado y nervioso pero (…) I try to calm myself. (CC)	poquito			ito	ito	no	ADJ	1c
	f						en Tucson puede hablar español un poquito	poquito			ito	ito	no	ADV	1c
	f						y hay tenemos uno que es muy muy gordita (una gata)	gordita			ito	ito	no	ADJ	1c
CESA028	f	under 20	BA	US	Mexico	Guatemala	Ahorita voy en junior year (PI), /okey/ mi tercer año	ahorita			ito	ito	lex	ADV	ex
CESA028	f						Sí, mi mamá: está haciendo su maestría ahorita en psicología	ahorita			ito	ito	lex	ADV	ex
CESA028	f						cuando éramos chiquitos mi hermano y yo /mhm/ empezó la universidad	chiquitos		child	ito	ito	no	ADJ	2a
CESA028	f						Sí, él: acaba cumplir, no va cumplir 18, tiene 17 ahorita.	ahorita			ito	ito	lex	ADV	ex
CESA028	f						No sé a el le gusta y lo peor del caso es que yo no quise hacer matemáticas hasta este año empecé /aja/ ahorita en el	ahorita			ito	ito	lex	ADV	ex
CESA028	f						Sí, porque cuando era chiquita jugaba (..) así con Barbies (PI) y de todo.	chiquita		child	ito	ito	no	ADJ	2a
CESA028	f						se me quedaba viendo y si voltiaba /sí/ un poquito como que se m-, ay no. /[risas] que raro/ bien incómodo	poquito			ito	ito	no	ADV	1c
CESA028	f						Habíamos hablado un poquito asi de amigos pero no habíamos salido pero sí lo conozco desde hace mucho	poquito			ito	ito	no	ADV	1c
CESA028	f						Asi le hacía a mi mamá /ah sí/ cuando éramos chiquitos pero no nos podía decir nada	chiquitos		child	ito	ito	no	ADJ	2a
CESA028	f						No, pero mi hermano también nació en marzo, entonces de chiquitos teníamos que compartir birthday parties (CC) /[risas]/ y nos caía tan mal	chiquitos		child	ito	ito	no	ADJ	2a
CESA028	f						Sí, el arbolito y todo [árbol de navidad]	arbolito			ito	ito	no	N	1c
CESA028	f						Pero si porque mi abuela si tiene arbolito	arbolito			ito	ito	no	N	2a
CESA028	f						Ahorita no, pero sí jugaba futbol de chiquita y jugaba en	ahorita			ito	ito	lex	ADV	ex
CESA028	f						Ahorita no, pero sí jugaba futbol de chiquita y jugaba en	chiquita		child	ito	ito	no	ADJ	2a
CESA028	f						Y si tienes B’s te dan un poquito menos	poquito			ito	ito	no	ADJ	1c
CESA028	f						Él hasta a veces lo saco sin la leash (PI) y ahí solito se va y corre y no más lo rodea.	solito			ito	ito	no	ADJ	2a
CESA028	f						De estar así bien dormida y veo así un pedacito negro o algo un shadow (PI) y ya no puedo dormir	pedacito			ito	ito	no	N	1a
CESA028	f						Se sien- me siento bien chiquita ya que lo digo	chiquita		child	ito	ito	no	ADJ	2a
CESA028	f						Sí, ahorita está sacando su maestría para ser counselor (PI).	ahorita			ito	ito	lex	ADV	ex
CESA028	f						[de vacaciones] Voy solita. Porque mi mamá y papá- bueno mi mamá tiene que trabajar	solita			ito	ito	no	ADJ	2a
CESA028	f						No, no porque la primera ves que fui, fue en enero que fui así solita y fue cuando mi bisabuela murió entonces yo como que me decidí como mi mamá ya se había ido el día antes y en la mañana yo- eh- me dijeron que había muerto y yo haci me decidí ya me voy a ir y empaqué mis cosas y me fui y amanecí allá porque me fui de noche.	solita			ito	ito	no	ADJ	2a
CESA028	f						Casi no he tenido, porque fue el primer lenguaje que aprendí así de chiquita y también solo están- solo eran mis papás y bueno en la iglesia de mi papá todos eran hispanos	chiquita		child	ito	ito	no	ADJ	2a
CESA028	f						sí les puedo hablar bien y todo, pero se me hace un poquito mas difícil como pensar así en las palabras que no uso de diario, se me hacen más un poquito difícil, pero no mucho.	poquito			ito	ito	no	ADJ	1c
CESA028	f						sí les puedo hablar bien y todo, pero se me hace un poquito mas difícil como pensar así en las palabras que no uso de diario, se me hacen más un poquito difícil, pero no mucho.	poquito			ito	ito	no	ADJ	1c
CESA028	f						A veces sí mas que todo hablamos inglés, pero así como cuando habla mi mamá con mi abuelita	abuelita			ito	ito	no	N	2a
CESA028	f						Depende de ellos y también de qué tan chiquitos aprenden el inglés.	chiquitos		child	ito	ito	no	ADJ	2a
CESA028	f						Y también los amigos porque él casi tiene- él casi amiguitos así tenía porque íbamos a escuelas privadas y yo casi todas mis amigas hablaban español también y los papás también	amiguitos			ito	ito	no	N	2a
CESA031	m	20-29	BA	US	Mexico	Mexico	Como era muy chiquito antes , ahm ahí vivían ellos la mayoría del tiempo ahm, pero ca- (...) no recuerdo: si me han dicho	chiquito		size	ito	ito	no	ADJ	1a
CESA031	m						Si tengo tres hermanas, mhm soy el único hombre /sois cuatro (...) vale/ (...) dos hermanas mayor y una hermanita	hermanita	child		ito	ito	no	N	2a
CESA031	m						Y la más chiquita: está en (...) la secundaria.	chiquita		child	ito	ito	no	ADJ	2a
CESA031	m						y no me daba- a mí me gustaba ir mucho al rancho ahí con mi tío en el pueblito ese, el Saric,/ah/	pueblito			ito	ito	no	N	1a
CESA031	m						Si hay gente que: se hace loquita y quiere:, ¿me entiendes?, pero no, no hay- no hay barrios porque yo me crié en el sur /mhm/	loquita			ito	ito	no	ADJ	3a
CESA031	m						y ya, me voy por mi ahí, y cuando voy llegando están ahí en el po:rche tomando su cafecito y entrando ¿me entiendes?	cafecito			ito	cito	no	N	2a
CESA031	m						Ahora sí, antes cuando yo estaba chiquito /no/ no veía mucho, en los noventas y en los- pues por el dos mil dos por ahí no se veían mucho,	chiquito		child	ito	ito	no	ADJ	2a
CESA031	m						No, no me esperaba eso, me esperaba puros americanos y un poquito de mexicanos.	poquito			ito	ito	no	ADV	1c
CESA031	m						y se mudaron aquí para- cerquita a la a la (CC) XY High School nomás para que luchara.	cerquita			ito	ito	no	ADV	1c
CESA031	m						Si lo pones cerquita de su espalda pero no todo, tol- todo para abajo /mhm/ más cerquita, agarras tres puntos	cerquita			ito	ito	no	ADV	1c
CESA031	m						Si lo pones cerquita de su espalda pero no todo, tol- todo para abajo /mhm/ más cerquita, agarras tres puntos y	cerquita			ito	ito	no	ADV	1c
CESA031	m						y mi papá se fue para Rio Rico que está cerquita de Nogales /mhm/ y mi amá se quedó aquí en Tucson.	cerquita			ito	ito	no	ADV	1c
CESA031	m						E:s porque allá no hay tantos- antes no había tantas casas, no- es un pueblito chiquito	pueblito			ito	ito	no	N	1a
CESA031	m						E:s porque allá no hay tantos- antes no había tantas casas, no- es un pueblito chiquito	chiquito		size	ito	ito	no	ADJ	1a
CESA031	m						y luego ahí es cuando empecé a perder pe:so y todo esto, porque era gordito en- /mhm/ en la secundaria, y es cuando empecé a perder peso y: a salir con los amigos ya.	gordito			ito	ito	no	ADJ	3a
CESA031	m						Y: [risas] cuando estaba más chamaco me subía arriba de un becerro y:- como un becerrito	becerrito			ito	ito	no	N	1a
CESA031	m						Es porque jugaba:, como yo era el único hombre /mhm/, jugaba yo a los carritos, a los soldados, a los ¿me entiendes?,	carritos			ito	ito	no	N	1c
CESA031	m						Las alitas, me encantan las alitas.	alitas			ito	ito	lex	N	ex
CESA031	m						Las alitas, me encantan las alitas.	alitas			ito	ito	lex	N	ex
CESA031	m						Si vas a comer alitas aquí en Tucson ve al (CC) Wings Over Broadway /okey/ que está aquí cerquita del (CC) Park Place	alitas			ito	ito	lex	N	ex
CESA031	m						Si vas a comer alitas aquí en Tucson ve al (CC) Wings Over Broadway /okey/ que está aquí cerquita del (CC) Park Place	cerquita			ito	ito	no	ADV	1c
CESA031	m						Sí, está lejitos. Y: lo bueno es que aquí en la universidad tienen esos cupones que compras doce y te regalan doce	lejitos			ito	ito	no	ADV	1c
CESA031	m						y ah las salsas que tiene están bien ricas, pero no son chiquitas /mhm/, son grandes, son pollo, pollo bien,	chiquitas		size	ito	ito	no	ADJ	1a
CESA031	m						Y: pues nos- nos tomamos unas cervezas y: el siguiente día amaneció un poquito crudito y le dije "agarraste menudo, échale mucho limón, échale chiltepin, cebolla y cómetelo"	poquito			ito	ito	no	ADJ	1c
CESA031	m						Y: pues nos- nos tomamos unas cervezas y: el siguiente día amaneció un poquito crudito y le dije "agarraste menudo, échale mucho limón	crudito			ito	ito	no	ADJ	1c
CESA031	m						Entonces yo: compré: mi mi prim- primer carrito, un Honda Cívic (CC) ninetee:n (...) nineteen eighty nin-, nineteen ninety, no me acuerdo.	carrito			ito	ito	no	N	2a
CESA031	m						Y por eso me vine a la escuela, porque ya no quería trabajar en construcción pero compré ese /clásico/ carrito y me llevaba de aquí a allá, ¿me entiendes?	carrito			ito	ito	no	N	1c
CESA031	m						Y luego ya, me agarré un Jeepisito, un (CC) nineteen ninety WhiteJ Jeep Wrangler.	Jeepesito			ito	ito	no	N	1c
CESA031	m						Como no puedo ir a cacería cerquita de la ciudad, tengo que estar un poquito retirado, y allá en Rio Rico donde vive mi apá, pues me puedo llevar el carro y vive como a unos cuarenta minutos manejando.	cerquita			ito	ito	no	ADV	1c
CESA031	m						Como no puedo ir a cacería cerquita de la ciudad, tengo que estar un poquito retirado, y allá en Rio Rico donde vive mi apá, pues me puedo llevar el carro y vive como a unos cuarenta minutos manejando.	poquito			ito	ito	no	ADJ	1c
CESA031	m						como por ejemplo, de Hermosillo a Guadalajara sale: ahorita si lo puedo agarrar como un mes antes o dos meses antes que te vas a ir, lo puedes agarrar por ciento veinte dólares	ahorita			ito	ito	lex	ADV	ex
CESA031	m						¡PERO EL DI MARÍA! /ya no, pero- no, eso sí/el Di- vendieron al Di María para agarrar el James y el Chicharito	Chicharito			ito	ito	lex	PN	ex
CESA031	m						El- mejor- ahorita casi como: (...) que no, no, tengo pero no tengo	ahorita			ito	ito	lex	ADV	ex
CESA031	m						Pero para i:r a un juego es diferente, ¿me entiendes? Puedes estar tomando unas birrias o comiendo y:/los perritos, ¿no? lo típico	perritos			ito	ito	lex	N	ex
CESA031	m						pero hay diferencia que uno que se pone unas botas (...) bien, con pantalones una camisola y su sombrero, ¿me entiendes? de un chamaco que se pone unos shortsitos (P) así y que anda enseñando el cuerpo y todo.	shortsitos			ito	cito	no	N	1a
CESA033	m	20-23	BA	US	Mexico	Mexico	Sí, me gusta. Más grande que Nogales. Nogales está muy chiquito.	chiquito		size	ito	ito	no	ADJ	1a
CESA033	m						Son muy con e:h como se dice pueblitos muy chicos.	pueblitos			ito	ito	no	N	1a
CESA033	m						Por trabajo sí. Se vinieron más cerquita a la frontera. Y luego se vinieron.	cerquita			ito	ito	no	ADV	1c
CESA033	m						La especias es pues, cuando viene a las especias son un poquito más sabe un poquito más la comida ahm (...) una.	poquito			ito	ito	no	ADV	1c
CESA033	m						Pero no (...) no es mucho pero /sí, también se nota/ tá un poco poquito más barato también allá.	poquito			ito	ito	no	ADJ	1c
CESA033	m						Hay mas partes donde llevarlo que si son como el ahm (...) a las bibliotecas que tienen actividades actividades para niño chiquitos o, o por las tiendas también.	chiquitos		child	ito	ito	no	ADJ	2a
CESA033	m						Allí en los barrios o aquí cerquita a la universidad ahora el downtown (P), ahora que empezaron a abrir mucho de los restauranes y bares nuevos allá.	cerquita			ito	ito	no	ADV	1c
CESA033	m						A mi ahorita de los mejores restaurans almorzar aquí en Tucson.	ahorita			ito	ito	lex	ADV	ex
CESA033	m						Está muy carito pero usé para happy hour	carito			ito	ito	no	ADJ	2b
CESA033	m						Estaba en uhm que estaba secundaria, estaba en la secundaria y estaba e-- estábamos un poquito antes de entrar a la clase, estábamos esperando que los abrieran la puerta más bien para la escuela.	poquito			ito	ito	no	ADV	1c
CESA033	m						Y porque me acuerdo que antes si me yo me tenía todos mis amigos que son con los que todavía me junto ahorita era por que vivíamos cerca nosotros.	ahorita			ito	ito	lex	ADV	ex
CESA033	m						Uhm, y eso lo que ya no veo, lo veo con mi primito que busca y todos con texto, ¿no? Mandándose mensajes.	primito	child		ito	ito	no	N	2a
CESA033	m						Más fácil por el sentido de la tecnología y también ahora uhm no que, ya sé que hay muchos problemas ahorita que con el child abuse (CC) y más ahorita con las noticias.	ahorita			ito	ito	lex	ADV	ex
CESA033	m						Más fácil por el sentido de la tecnología y también ahora uhm no que, ya sé que hay muchos problemas ahorita que con el child abuse (CC) y más ahorita con las noticias.	ahorita			ito	ito	lex	ADV	ex
CESA033	m						Pero ahora también los niños ya saben pues ya te lo haces un poquito más cosas.	poquito			ito	ito	no	ADV	1c
CESA033	m						Um, no sé como un xxx, yo digo más un ejemplo, por mi primito ¿no?	primito	child		ito	ito	no	N	2a
CESA033	m						Las diferencias pues ahorita lo que veo yo más con las diferencias de la gente es como muchas veces o que sea cuando yo estaba creciendo era mucho de no no faltarle el respeto a los adultos.	ahorita			ito	ito	lex	ADV	ex
CESA033	m						Y ahorita lo veo un poquito más que como que ya uno ya se ven muy igualados como que ya o no o no captan la diferencia o no más no ven la diferencia entre uno que tiene veinte años y uno que tiene sesenta	ahorita			ito	ito	lex	ADV	ex
CESA033	m						Y ahorita lo veo un poquito más que como que ya uno ya se ven muy igualados como que ya o no o no captan la diferencia o no más no ven la diferencia entre uno que tiene veinte años y uno que tiene sesenta	poquito			ito	ito	no	ADV	1c
CESA033	m						Sí, cada generación es un poquito diferente y pues cambian el falto al respeto pues cambia no mas también porque se van perdiendo au- o por lo menos con la cultura mexicana	poquito			ito	ito	no	ADJ	1c
CESA033	m						Yo empecé a jugar desde que estaba chiquito que mi mamá me metía a las ligas en Nogales.	chiquito		child	ito	ito	no	ADJ	2a
CESA033	m						El el hierro es la mayoría eran de la escuela porque esos si eran un poquito más caritos.	poquito			ito	ito	no	ADJ	1c
CESA033	m						El el hierro es la mayoría eran de la escuela porque esos si eran un poquito más caritos.	carito			ito	ito	no	ADJ	1c
CESA033	m						Entonces ella, como era compañera de mi mamá, ella era muy difícil conmigo, como que siempre expectaba un poquito más de mí que de los otros estudiantes.	poquito			ito	ito	no	ADV	1c
CESA033	m						Me tocó un- un accidente pero fue acci- uhm un muchachito era se me hace que el qui- quinto o cuarto grado.	muchachito	child		ito	ito	no	N	1c
CESA033	m						Estaba uhm estaba con un maestro le estaba agarrando la mano y el muchachito como que se quiso colgar de su brazo no sé como estuvo pero cayó de cabeza y le sangró la cabeza pero no fue culpa del maestro /sí/ fue más bien el muchacho que se cayó de frente.	muchachito	child		ito	ito	no	N	1c
CESA033	m						A mí muchos de sus estudiantes que cuando estaba que le tiraban que le dicen las spit balls (CC), ¿no? Que es el popote con el, con las papelitos o los avioncitos y esas cosas, ¿no? que.	papelitos			ito	ito	no	N	1c
CESA033	m						A mí muchos de sus estudiantes que cuando estaba que le tiraban que le dicen las spit balls (CC), ¿no? Que es el popote con el, con las papelitos o los avioncitos y esas cosas, ¿no? que.	avioncitos			ito	ito	no	N	1c
CESA033	m						Ahorita soy uhm service manager (CC).	ahorita			ito	ito	lex	ADV	ex
CESA033	m						Yo tengo mas bien actividades de guardar a las a las cajeras de con cualquier problemita que tengan que uhm también tengo uhm asegurarme que está el banco está haciendo todo uh las regulaciones de de los reglas que los pone el gobierno y también manejar un poco la tienda si no está la gerente.	problemita			ito	ito	no	N	1c
CESA033	m						Era no más uhm atender a los clientes que entraban uhm, asegurarlos que los carritos de golf estaban limpios.	carritos			ito	ito	no	N	1a
CESA033	m						Mi niño hasta ahorita te digo, una vez le dio calentura, ya tiene va a cumplir cuatro años.	ahorita			ito	ito	lex	ADV	ex
CESA033	m						Salimos a ver, de vez en cuando vamos mucho al a a downtown (P). Que vamos a cenar y luego un trago al XY ahorita que abrió o algo así nuevo.	ahorita			ito	ito	lex	ADV	ex
CESA033	m						Sí esta grandecito ya [el hijo de la informante]	grandecito			ito	cito	no	ADJ	1c
CESA033	m						Va a hacer las cosas de los ponle que un poquito ya de nosotros cuando estamos creciendo lo que oían los papás pero ahorita mi esposa le gusta mucho el que es el que le dicen el pop country (CC), ¿no?	poquito			ito	ito	no	ADJ	1c
CESA033	m						Va a hacer las cosas de los ponle que un poquito ya de nosotros cuando estamos creciendo lo que oían los papás pero ahorita mi esposa le gusta mucho el que es el que le dicen el pop country (CC), ¿no?	ahorita			ito	ito	lex	ADV	ex
CESA033	m						y entró: una novia que tuve que tuve como unos dos tres años. So (P) estuvo, y los sentaron enseguidita. Casi de película, ¿no?	enseguidita			ito	ito	no	ADV	1c
CESA033	m						Fuimos a Nogales, Sonora. Y en ese tiempo me estaba juntando con unos amigos que habíamos hecho en Nogales, Sonora. Y los empezamos un poquito de más.	poquito			ito	ito	no	ADV	1c
CESA033	m						Sí, estás yendo a la escuela o a la universidad, ¿no? Pero como nosotros que ya vivo un poquito más lejos ya pasado Tucson cerquita del aeropuerto sí	poquito			ito	ito	no	ADV	1c
CESA033	m						Sí, estás yendo a la escuela o a la universidad, ¿no? Pero como nosotros que ya vivo un poquito más lejos ya pasado Tucson cerquita del aeropuerto sí	cerquita			ito	ito	no	ADV	1c
CESA033	m						Ah muy calladitos, ¿no? Mientras tú pagas o pasas tu pase, no nunca me tocó hablar ni oírlos hablar mucho.	calladitos			ito	ito	no	ADJ	1c
CESA033	m						Es, sí, un poquito lento aquí en Tucson, y luego pues, pero tiene que crecer obviamente pero pues a--por lo tanto es algo que no tenía Tucson que yo creo que sí le va a dar buen negocio a las partes donde le afectan.	poquito			ito	ito	no	ADJ	1c
CESA033	m						De de batman del batmobile (CC). /sí/ Yo creo que ese es de lo que mas siempre me acuerdo, ¿no? [risas] De chiquito siempre.	chiquito		child	ito	ito	no	ADJ	2a
CESA033	m						No, si ahora ya que todo o te piden lo que quieres o pues ya también como lees el, tengo, tengo un primito que tiene once años y quiere él que pasa el verano quiere él ya quiere su primer celular.	primito	child		ito	ito	no	N	2a
CESA033	m						hablaban español a los- o muy poquita, muy poquita los tenían que ver. O si como te digo por ejemplo yo veía mis uhm abuelos en los fin de semana.	poquita			ito	ito	no	ADV	1c
CESA034	m	22	BA/BS in process	US	Honduras	Mexico	Soy el más grande de tres. /Okey/ Tengo:, mi hermanito tiene…tengo 22 él tiene: on-(…) once.	hermanito	child		ito	ito	no	N	2a
CESA034	m						Sí, once, y mi hermanita tie:ne: nueve? Nueve.	hermanita	child		ito	ito	no	N	2a
CESA034	m						mi hermano se llama XY /uhum/ y mi hermanita se llama XY	hermanita	child		ito	ito	no	N	2a
CESA034	m						porque eh, el presidente antes que yo era XY, lo conocistes /hmm/ o creo que lo conocistes /el de pelo largo?/ no, no, no, como gordito (…)	gordito			ito	ito	no	ADJ	3a
CESA034	m						Porque ahí en el pueblo no, ahí no hay nada más tienditas /uhum/.	tienditas			ito	ito	no	N	1c
CESA034	m						En México se conoce como tienda de abarrotes o en Sonora también tienditas nomás	tienditas			ito	ito	no	N	1c
CESA034	m						así como: fuistes a la tienda y se te olvidó una salsa de tomate, /ya/ pues en la esquina está una tiendita y vas y /uhum/ lo consigues.	tiendita			ito	ito	no	N	1c
CESA034	m						por corto, pero sí, no sé, pues so:das, papi:tas, una que otra así como: comida enlatada	papitas			ito	ito	lex	N	ex
CESA034	m						Aunque fue no más, comimos así poquito /si/ pero estuvimos ahí conociéndonos, platicando, y:, so (P), es bonito	poquito			ito	ito	no	ADJ	1c
CESA034	m						Eh, no era lo que yo pensaba. /ah, okey/ Porque, eh pues aquí lo que es churros, pa mi son pues no sé si conoces los churros, panecitos de…//sí, los churros que los con chocolate//	panecito			ito	cito	no	N	2a
CESA034	m						Y vamos a una, la tiendita, y:, compra unas papitas /ahm/ y traía las papitas, eh fritanga, o:, o como, no sé cómo les digan en España	tiendita			ito	ito	no	N	1c
CESA034	m						sí, las Lays y eso. Pues en México le decimos papitas o sabritas	sabritas			ito	ito	lex	N	ex
CESA034	m						“Primo, qué significa churro aquí?” “OH, pues papitas.”“OH,” me quedé:, en México es,es diferente	papitas			ito	ito	lex	N	ex
CESA034	m						Oye:, traes pisto?” Y me quedé: “no:((...).)?, [risas] no traigo”, lo si-, “perdón”, pero significa dinero y se me hizo interesante cositas así.	cositas			ito	ito	no	N	2a
CESA034	m						ahm, depende…eh, ahorita durante el otoño siempre son más, están más espar-, eh, spread out (P). ¿esparcidos?	ahorita			ito	ito	lex	ADV	ex
CESA036	m	40-49	BA/BS	US	US	US	Yo nací: en un pueblito que se llama Morenci Arizona	pueblito			ito	ito	lex	N	ex
CESA036	m						Mis papás son de, de esos pueblitos también, mi papá era de Morenci (…) y mi mamá es de un pueblito cinco millas, por ahí de- de Morenci, que se llama Clifton (P).	pueblitos			ito	ito	lex	N	ex
CESA036	m						Mis papás son de, de esos pueblitos también, mi papá era de Morenci (…) y mi mamá es de un pueblito cinco millas, por ahí de- de Morenci, que se llama Clifton (P).	pueblito			ito	ito	lex	N	ex
CESA036	m						NO, yo fui- yo: (…) pasé mi, mi infancia y juventud en otro pueblito que se llama Mammoth, Arizona (P).	pueblito			ito	ito	lex	N	ex
CESA036	m						Y luego regresó mi papá, consiguió trabajo ahí en ese pueblito, en San Manuel Mammoth (P), por ahí (…) y ahí crecí yo	pueblito			ito	ito	lex	N	ex
CESA036	m						El pueblito está: (…) ah, de aquí de Tucson es una hora norte /mhm/ que viene siendo en el otro lado del Monte Limón /okey/ de las montañas Santa Catalinas.	pueblito			ito	ito	lex	N	ex
CESA036	m						Ahí quedan esos pueblitos (…), lo dicen el Copper Basin (P) porque minaban, uh minaban um cobre. Todavía minan cobre ahí. /sí/ De ahí vengo.	pueblitos			ito	ito	lex	N	ex
CESA036	m						Estuvo estupendo como- ó sea pero juventud era un poco- un poquito menos agradable (…) porque es un pueblo, no hay muchas oportunidades, ¿ya sabes?	poquito			ito	ito	no	ADJ	1c
CESA036	m						Con nosotros sí nos daban un poquito más libertad expresarnos	poquito			ito	ito	no	ADJ	1c
CESA036	m						Yo me vine para estudiar porque YA: a esa edad ya quería salir de mi pueblito. /aha/ Ya estaba harto.	pueblito			ito	ito	no	N	1c
CESA036	m						a a los dos, tres años ya se divorciaron (...) y este- se quedó mi papá en el pueblito, en el pueblito de dónde crecí yo.	pueblito			ito	ito	lex	N	ex
CESA036	m						Cuando salí de estudiar y cuando regresé, SÍ era un poquito más divertida	poquito			ito	ito	no	ADJ	1c
CESA036	m						Y me llegaba el cheque los viernes. /[risas]/ Aunque, aunque muy poco:- (…) hay veces- um- los cheques estaban muy poco- estaban muy chiquita /sí/ pero yo era estudiante pues.	chiquita		size	ito	ito	no	ADJ	3a
CESA036	m						Pues ahorita esta más grande, ya eso por hecho, está más grande.	ahorita			ito	ito	lex	ADV	ex
CESA036	m						Todo ahorita es más grande (…), cuando me tocó de estudiante no habían cambiado nada	ahorita			ito	ito	lex	ADV	ex
CESA036	m						no habían cambiado nada ha- por muchos, muchos años, ¿no? Y ahorita todo esta- todo ha sido modernizado.	ahorita			ito	ito	lex	ADV	ex
CESA036	m						Y: pienso ahorita dijo- digo yo //había una parte de la comunidad, por ejemplo ahí en el downtown (P)	ahorita			ito	ito	lex	ADV	ex
CESA036	m						Entonces, en el nombre del desarrollo económico y no veo ningún desarrollo económico ahorita.	ahorita			ito	ito	lex	ADV	ex
CESA036	m						Ahm, en una esquinita del del TCC (P). Ya ves que hay unas estatuas de bronce, ¿no?	esquinita			ito	ito	no	N	1a
CESA036	m						Me acuerdo de mi pueblito, porque así se veía.	pueblito			ito	ito	no	N	2a
CESA036	m						O sea ya está un poquito mejor, pero todavía falta.	poquito			ito	ito	no	ADJ	1c
CESA036	m						Los valores de familia todavía tenemos, aunque es un poquito diferente.	poquito			ito	ito	no	ADJ	1c
CESA036	m						Está: (...) un poquito norte de mi pueblito de donde soy.	poquito			ito	ito	no	ADJ	1c
CESA036	m						Está: (...) un poquito norte de mi pueblito de donde soy.	pueblito			ito	ito	no	N	2a
CESA036	m						Y después del tratado- el trato de Guadalupe Hidalgo, que ahorita ya es más, /sí/ más al sur.	ahorita			ito	ito	lex	ADV	ex
CESA036	m						no (...) porque sea el día de i- de ide- independencia de México, sino es cuando vi el ballet folklórico en mi pueblito por la primera vez.	pueblito			ito	ito	no	N	2a
CESA036	m						/o:h/ Y este, e- yo estaba, las fiestas patrias en mi pueblito están ahí en la iglesia, ahí en los terrenos de la iglesia católica.	pueblito			ito	ito	no	N	2a
CESA036	m						Es el pueblito, todos se conocen, ¿no?	pueblito			ito	ito	lex	N	ex
CESA036	m						Entonces- y cuando me di cuenta que era de ahí de mi propio pueblito.	pueblito			ito	ito	no	N	2a
CESA036	m						Y había un- unos seis años donde no lo hacía porque no había con quien (..) ahí en mi pueblito.	pueblito			ito	ito	no	N	2a
CESA036	m						Entonces se fueron a otro pueblito y no hubo nada.	pueblito			ito	ito	lex	N	ex
CESA036	m						Y, y, y sí, si hub- hubiera querido, hubiera viajado un poquito más no, pero.	poquito			ito	ito	no	ADJ	1c
CESA036	m						O sea la gente de las ciudades grandes pues, es un poquito menos amigable pues, es un poquito ma- menos amable.	poquito			ito	ito	no	ADJ	1c
CESA036	m						Sí, la vida es un poquito más tranquila.	poquito			ito	ito	no	ADJ	1c
CESA036	m						s un- poqui- pues, por ser pueblito es un poquito más conservadora.	pueblito			ito	ito	lex	N	ex
CESA036	m						s un- poqui- pues, por ser pueblito es un poquito más conservadora.	poquito			ito	ito	no	ADJ	1c
CESA036	m						Mi hermana s-s- habla español, un poquito má- con poquito más dificultad que yo.	poquito			ito	ito	no	ADV	1c
CESA036	m						Y ahorita todo lo que viene siendo se me hace bonito.	ahorita			ito	ito	lex	ADV	ex
CESA037	f	30-39	BA	US	Mexico	US	Um: [risas] en México [risas] en México pero no sé cómo se llaman. Son de unos pueblitos.	pueblitos			ito	ito	no	N	1c
CESA037	f						Ahorita está trabajando en Target pero: mi papá ya se retiró de trabajar xxx	ahorita			ito	ito	lex	ADV	ex
CESA037	f						Ahorita mi mamá sí vive aquí: mi: papá ahorita: está en California (P) porque está enferma mi abuelita, so:. So, (CC) está allá.	ahorita			ito	ito	lex	ADV	ex
CESA037	f						Ahorita mi mamá sí vive aquí: mi: papá ahorita: está en California (P) porque está enferma mi abuelita, so:. So, (CC) está allá.	ahorita			ito	ito	lex	ADV	ex
CESA037	f						Ahorita mi mamá sí vive aquí: mi: papá ahorita: está en California (P) porque está enferma mi abuelita, so:. So, (CC) está allá.	abuelita			ito	ito	no	N	2a
CESA037	f						Uhm: pues, mis abuelitos al lado de mi papá: son de: allá como de Guadalajara. Sur de México	abuelitos			ito	ito	no	N	2a
CESA037	f						Y que yo sepa mis abuelo:s cuando se casaron mi abuelito trabajaba: por mi bisabuelo	abuelito			ito	ito	no	N	2a
CESA037	f						o sea trabajó mi abuelito en Texas (P) por un tiempo y luego: de allí creo que trabajaba en construcción	abuelito			ito	ito	no	N	2a
CESA037	f						y luego de allí se cambió a- o se mudó a California (P) y: (…) creo que mi abuelito tiene como unos: sesenta años ya en California (P) /en California (P)/.	abuelito			ito	ito	no	N	2a
CESA037	f						Y luego el abuelito al lado de mi mamá: el trabajo también lo trajo aquí, o sea de la pisca.	abuelito			ito	ito	no	N	2a
CESA037	f						Lo que me dicen ellos es que primero vino mi abuelo y luego se trajo algunos de los chamacos, y luego al fin que la esposa [risas], pues mi abuelita y el resto de los niños.	abuelita			ito	ito	no	N	2a
CESA037	f						Pero la gente hispana s- se saludan, se ayudan que, “oye, ¿tienes un poquito de sal?” que me prestes xxx algo, pero: (…) sí.	poquito			ito	ito	no	ADJ	1c
CESA037	f						Like uh, but yeah (CC) luego: ahorita: empecé a jugar con los intermurals (P), uh sand volleyball so (CC) empecé a jugar eso so (CC) me gusta mucho eso.	ahorita			ito	ito	lex	ADV	ex
CESA037	f						Sí. Ahorita el equipo son más de: uhm hydrology majors (CC) //Ah, okey.// I’m like, “Oh,(…) nice!” (C	ahorita			ito	ito	lex	ADV	ex
CESA037	f						¿No? Wow. /pero si hay/ Yeah. Allí en grupitos.	grupitos			ito	ito	no	N	1a
CESA037	f						Ahorita no porque como hay- hemos tenido mucha lluvia mucha lluvia y se llena allí con agua y-.	ahorita			ito	ito	lex	ADV	ex
CESA037	f						Uhm: el- pues, o sea muchos que ahora ya son tech-savvy (CC) y: tengo una.. una hermanita de diecisiete años y un hermano también de veintiún años y: como he visto oh pues también tengo una hermana de veintioch- veintiocho años.	hermanita	child		ito	ito	no	N	2a
CESA037	f						Pero mi hermanita, creo que como ya empezando con lo tech-savvy (CC) que la computadora- que es puro computadora.	hermanita	child		ito	ito	no	N	2a
CESA037	f						I’m like- a mi hermanita especialmente I’m like, “contesta el teléfono, dude no seas así” (CC) “Ah, es que me da flojera, ay ni me gusta que me hablen mejor que me manden un text [risas]	hermanita	child		ito	ito	no	N	2a
CESA037	f						Y no- que Así como el cereal, y así como mi sopita.	sopita			ito	ito	no	N	2a
CESA037	f						La única persona que podía relacionar con la cultura mexicana era mi abuelita.	abuelita			ito	ito	no	N	2a
CESA037	f						Antes trabajaba en otro lugar donde- otra locación- que era más gente más mayor o sea sería como si estuviera hablando con mis abuelitos pero: puro gringo o sea /sí/ so: (CC) no:- la transición de poder ahm: manejar una conversación era más difícil y te veían más como:, like (…) no (CC) /[risas]/ “Ay, no mija.” /sí/ me das mi recibo y es todo, okey.	abuelitos			ito	ito	no	N	2a
CESA037	f						you know (CC)- ponemos a- a- de acuerdo de, “okey puedo tomar esta clase y whatever (CC)”. Por ahorita, sí.	ahorita			ito	ito	lex	ADV	ex
CESA037	f						Y ahorita, por ejemplo, en la iglesia donde estamos ahm: el pastor allí también es el director de: XY [56:32]	ahorita			ito	ito	lex	ADV	ex
CESA037	f						Compramos nuestras cajitas y las llenamos de juguetes y todo.	cajitas			ito	ito	no	N	2a
CESA038	m	32	High School	US	Mexico	Mexico	Pues ya hasta cierto punto ya paras de [risa] /[risa]/ de ponerle velitas al pastel.	velitas			ito	ito	no	N	1c
CESA041	m	20-29	BA/BS in process	US	Mexico	Mexico	Jueves? Sí y desde entonces no no se ha podido// Hasta ahorita.	ahorita			ito	ito	lex	ADV	ex
CESA041	m						Sí sí era, deberían, hubiéramos acabado como a la una. Aquí mira se le olvido al XY una casita, una casita verde.	casita			ito	ito	no	N	1a
CESA041	m						[pregunta: ¿Te gusta el pelo chino?] Así como lo tiene ella, así exactito [el pelo de otra persona]]	exactito			ito	ito	no	ADJ	1c
CESA041	m						Oyes, ¿la XY está desocupada ahorita? [participante hace pregunta a entrevistadora]	ahorita			ito	ito	lex	ADV	ex
CESA041	m						O:h, ¿y tú tienes tienes mucha tarea que hacer ahorita?	ahorita			ito	ito	lex	ADV	ex
CESA041	m						No tengo papitas.	papitas			ito	ito	lex	N	ex
CESA041	m						Pues por eso para conversar en la caminada. (..) Bajar, (..) quemar algunas calorías y así subirlas de nuevo, comiendo papitas, (..) ¿no? Y así no te sientes tan mal.	papitas			ito	ito	lex	N	ex
CESA041	m						No te sientes mal comiendo papitas así de la nada.	papitas			ito	ito	lex	N	ex
CESA041	m						¿Papitas? Entonces no, no comemos papitas. Comemos otras cosas	papitas			ito	ito	lex	N	ex
CESA041	m						También (…) a mí me gusta todo lo dulce y las papitas pero es que están bien caras.	papitas			ito	ito	lex	N	ex
CESA041	m						Sí y pues ahorita le hablé y no me contestó. Ha de estar trabajando.	ahorita			ito	ito	lex	ADV	ex
CESA041	m						Hay un chorro de cosas en esa maldita tienda.	maldita			ito	ito	no	ADJ	2a
CESA041	m						Sí sabes que en las filas hay como unas cajitas.	cajitas			ito	ito	no	N	1a
CESA041	m						Casi no tenemos back stock (P) casi. /ooh/ Es bien poquito. Aah pero sí todo estaba afuera	poquito			ito	ito	no	ADJ	1c
CESA041	m						Me sentaron en un lugar donde había puros señores que nomás fueron a comer o desayunar. Era un cuartito	cuartito			ito	ito	no	N	1a
CESA041	m						Si supiera má- un poquito más bien el contexto, entonces sí ya te lo pudiera haber corregido un poquito más.	poquito			ito	ito	no	ADJ	1c
CESA041	m						Si supiera má- un poquito más bien el contexto, entonces sí ya te lo pudiera haber corregido un poquito más.	poquito			ito	ito	no	ADJ	1c
CESA041	m						Pues, ¿cuánto- qué- qué es semana la escuela ahorita la sexta, no?	ahorita			ito	ito	lex	ADV	ex
CESA041	m						Así que por ahorita de lo que yo sé Elevate (P) sigue teniendo reservado Gallagher (P) hasta hasta que se acabe este semestre.	ahorita			ito	ito	lex	ADV	ex
CESA041	m						Así que ahorita ya sé han cargado seven hundred fifty (CC) así que ciento cincuenta.	ahorita			ito	ito	lex	ADV	ex
CESA041	m						[pregunta de entrevistadora: ¿Vas a estas buscando en Phoenix o algo así?] Pues ahorita no.	ahorita			ito	ito	lex	ADV	ex
CESA041	m						Sí [risas] ahorita sí pero sí me voy a tener que ir a buscar. (..)	ahorita			ito	ito	lex	ADV	ex
CESA041	m						No me puedes decir algo más interesante. Me tienes que decir- bueno a lo mejor todo lo que te acabo de contar ahorita no hubo nada de interesante, pero /pero/ sí:.	ahorita			ito	ito	lex	ADV	ex
CESA041	m						No nos, no nos pudimos de poner de acuerdo XY y yo porque andaba ahí de ojitos el XY.	ojitos			ito	ito	no	N	3a
CESA042	f	32	BA/BS	US	Mexico	Mexico	Um, mis papás son de: Sinaloa. […] Mhm, los dos. De un rancho muy chiquito.	chiquito		size	ito	ito	no	ADJ	1c
CESA042	f						Um, mi niño va a cumpli:r, el más chiquito, un año el tres de marzo.	chiquito		child	ito	ito	no	ADJ	2a
CESA042	f						Um, como cuando estaba chiquita mi mamá, ella también le gusta mucho la man- lo manual, /mhm/ So (P) hacíamos como moños para el pelo.	chiquita		child	ito	ito	no	ADJ	2a
CESA042	f						Um y me gustó porque es muy chiquita y pude um tener muchos amigos porque nomás nuestra clase fue de cómo cincuenta?	chiquita		size	ito	ito	no	ADJ	1a
CESA042	f						Entonces ellos aprendieron desde chiquitos español /mm/ y yo también les hablo español.	chiquitos		child	ito	ito	no	ADJ	2a
CESA042	f						Um, fuimos a Elche, es una ciudad muy chiquita, um cerca de:- a Madrid.	chiquita		size	ito	ito	no	ADJ	1a
CESA042	f						Nos gusta mucho jugar con los trenes. Los carritos.	carritos			ito	ito	lex	N	ex
CESA042	f						Sí, cada vez que vamos al Frys (P) pues compro un carrito.	carrito			ito	ito	no	N	1c
CESA042	f						Tienen muchos carritos /ah, sí/ Sí, y les y les gusta mucho los trenes, de los choo-choos, Thomas the Choo-Choo (P) /the Choo-Choo	carritos			ito	ito	no	N	1c
CESA042	f						Sí, pero sí siempre mi esposo también le gusta mucho porque él es de California, de una ciudad muy chiquitita.	chiquita		size	ito	ito	no	ADJ	1c
CESA042	f						pues toma mucho tiempo, y dinero /mhm/ y no es algo que pudiera hacer ahorita tal vez después.	ahorita			ito	ito	lex	ADV	ex
CESA042	f						Debería de ir todos los domingos, /mhm/ pero antes sí cuando estaba chiquita.	chiquita		child	ito	ito	no	ADJ	2a
CESA042	f						Pero ya ahora con niños /mhm/ es difícil /sí/ porque /creo que sí/ estoy esperando que crezcan un poquito porque no se quedan en paz.	poquito			ito	ito	no	ADJ	1c
CESA042	f						Es una iglesia católica, /mhm/ pero um, cuando hemos ido cuando ellos estaban chiquitos, y hacen mucho ruido.	chiquitos		child	ito	ito	no	ADJ	2a
CESA042	f						Gritan y /oh, sí, sí/ y la gente pues va para /[risas], uhu/ rezar necesita ser callado, y so (P) a ver si ya que sea un poquito más grande que entienda /mhm/ y no puede hablar.	poquito			ito	ito	no	ADJ	1c
CESA042	f						Sí, como ahorita ya fue el día de la ceniza	ahorita			ito	ito	lex	ADV	ex
CESA042	f						Y la verdad es a mí también, será porque así era cuando estaba chiquita, /mhm/ como me gusta más escuchar en español.	chiquita		child	ito	ito	no	ADJ	2a
CESA042	f						Pero ya que me comprometí, ya deje la escuela, y la verdad ahorita no, no tengo tiempo.	ahorita			ito	ito	lex	ADV	ex
CESA042	f						Ah, pues no como niños chiquititos, pero así.	chiquitos		child	ito	ito	no	ADJ	2a
CESA042	f						Sí, nosotros tenemos dos [perros] chiquitos.	chiquitos		size	ito	ito	no	ADJ	1a
CESA042	f						Son como uh, um, poodle (P) y un mini pincher (P). /ahh/ Están feítos. [risas] Son chiquitos y tienen pelo larguito, sí.	feitos			ito	ito	no	ADJ	2a
CESA042	f						Son como uh, um, poodle (P) y un mini pincher (P). /ahh/ Están feítos. [risas] Son chiquitos y tienen pelo larguito, sí.	chiquitos		size	ito	ito	no	ADJ	1a
CESA042	f						Son como uh, um, poodle (P) y un mini pincher (P). /ahh/ Están feítos. [risas] Son chiquitos y tienen pelo larguito, sí.	larguitos			ito	ito	no	ADJ	1c
CESA042	f						sí porque como están chiquitos /aha/ son así naturalmente chiquitos.	chiquitos		size	ito	ito	no	ADJ	1a
CESA043	f	20-29	BA/BS in process	US	Mexico	Mexico	Ahorita estoy viendo (…) No sé como se llama. Casi no tengo tiempo de verla siempre, la que esté puesta en Univisión [una telenovela]	ahorita			ito	ito	lex	ADV	ex
CESA043	f						que según esto cuando estaba chiquita decían que los reyes magos lo--nos traían temprano	chiquita		child	ito	ito	no	ADJ	2a
CESA043	f						[pregunta de la entrevistadora: ¿De niña qué-qué cosas te gustaban hacer? ] De chiquita estaba en folclórico	chiquita		child	ito	ito	no	ADJ	2a
CESA043	f						Mi hermanita, mi hermanita tiene problemas eh mentales	hermanita	child		ito	ito	no	N	2a
CESA043	f						Mi hermanita, mi hermanita tiene problemas eh mentales. Pues desde chiquita yo la he cuidado	chiquita		child	ito	ito	no	ADJ	2a
CESA043	f						[pregunta de entreviistadora: ¿Y: mhm- y no te arrepientas de algo? ] Pues ahorita no	ahorita			ito	ito	lex	ADV	ex
CESA043	f						Ya no tengo vida social [risas]. Tenía un poquito y ahora pues no. Como vivo aquí en la universidad…	poquito			ito	ito	no	ADJ	1c
CESA043	f						Las cucarachas, las- no me gustan los- los animales chiquitos son los que más me hacen xxx	chiquitos		size	ito	ito	no	ADJ	1a
CESA043	f						Desde chiquita siempre era el equipo que le iba a mi familia	chiquita		child	ito	ito	no	ADJ	2a
CESA043	f						[pregunta de entrevistadora: ¿Pues por ejemplo nunca quisiste, no sé, tener otro hermanito o… no?] Sí ya tengo con mi hermanita.	hermanita	child		ito	ito	no	N	2a
CESA043	f						y luego cuando yo trabaje pues es tiempo para regresarles un poquito lo que ellos me han dado	poquito			ito	ito	no	ADJ	1c
CESA043	f						Este fin de semana mis abuelos me estaban contando historias de um cuando ellos-cuando ellos estaban chiquitos	chiquitos		child	ito	ito	no	ADJ	2a
CESA043	f						tengo primos que son mucho más mayores y pues primitos chiquitos y me llevo más con los que son de mi edad	primitos	child		ito	ito	no	N	2a
CESA043	f						tengo primos que son mucho más mayores y pues primitos chiquitos y me llevo más con los que son de mi edad	chiquitos		child	ito	ito	no	ADJ	2a
CESA043	f						Traía a veces- traía un librito donde escribía las palabras	librito			ito	ito	no	N	1a
CESA043	f						Yo digo que sí ahora, de-de chiquita sí pasaba las vacaciones pero era diferente.	chiquita		child	ito	ito	no	ADJ	2a
CESA043	f						y paso las vacaciones ahora pues, me gustaría aprender un poquito más del español	poquito			ito	ito	no	ADJ	1c
CESA043	f						Cuando fue chiquito, cuando se mudó a Hermosillo	chiquito		child	ito	ito	no	ADJ	2a
CESA043	f						Sí, con las leyendas que me acuerdo cuando estaba chiquita que sí	chiquita		child	ito	ito	no	ADJ	2a
CESA043	f						Sí de chiquita sí, que según esto la llorona venía del closet,	chiquita		child	ito	ito	no	ADJ	2a
CESA044	m	20-29	BA/BS in process	US	Mexico	Mexico	: Si, pues por ahorita xxx en colegio me gusta porque es flexible con la escuela	ahorita			ito	ito	lex	ADV	ex
CESA044	m						Ahorita pues nuestros horarios son un poco diferente ya que ella trabaja de noche,	ahorita			ito	ito	lex	ADV	ex
CESA044	m						como se dice, desde muy chiquitos les enseñaron a a seguir la religión ¿no? y entre toda mi familia,	chiquitos		child	ito	ito	no	ADJ	2a
CESA044	m						toda mi familia son fanático de las Chivas, y yo desde chiquito me ha gustado mucho.	chiquito		child	ito	ito	no	ADJ	2a
CESA044	m						Um... no, no creo que están jugando ahorita, los vi jugar... hace unos meses	ahorita			ito	ito	lex	ADV	ex
CESA044	m						Se significa cansancio porque muchos dicen que lo que estés viviendo ahorita es lo que vas a soñar cuando te vayas a dormir,	ahorita			ito	ito	lex	ADV	ex
CESA044	m						Si es importante, ya que lo que es ahorita es algo que te va afectar en el futuro y pues es algo que me gusta mucho	ahorita			ito	ito	lex	ADV	ex
CESA045	f	20-29	BA/BS	US	Mexico	Mexico	Pues, cuando estaba en Nogales es una ciudad mu:y muy chiquita entonces no hay mucho que hacer	chiquita		size	ito	ito	no	ADJ	1a
	f						Él ahorita no tiene su estatus legal	ahorita			ito	ito	lex	ADV	ex
	f						Porque ahorita no puede salir a México	ahorita			ito	ito	lex	ADV	ex
	f						Y todo eso pues fueron cositas me fueron diciendo, “Sabes que sí esto es lo que quiero hacer.”	cositas			ito	ito	no	N	1c
	f						Empiezas a tener la oportunidad a ti y una cosa que le amaban en la escuelita para que tú seas servidor.	escuelita			ito	ito	no	N	1c
	f						Era el grupo uno los jovenes que ahora estaban muy chiquitos o no habían revivido su retiro	chiquitos		child	ito	ito	no	ADJ	2a
	f						Ayudamos en los retiros de niños más chiquitos	chiquitos		size	ito	ito	no	ADJ	1c
	f						Y ya después de ahí hice mi último retiro y después fue cordinadora de escuelita	escuelita			ito	ito	lex	N	ex
	f						y escuelita es la prep- los muchachos (ch) que quieren ser servidores en un retiro.	escuelita			ito	ito	lex	N	ex
	f						Y ya después de esa cordinación de escuelita par-participé en mi último retiro y ya	escuelita			ito	ito	lex	N	ex
	f						Todos los demás estaban más chiquitos	chiquitos		child	ito	ito	no	ADJ	2a
	f						Sí, ya ahorita ya pueden estar en el mismo lugar	ahorita			ito	ito	lex	ADV	ex
	f						Cuando los hermanos estaban más chiquito, ella sí entendía muy bien el español pero su hermanito no	chiquito		child	ito	ito	no	ADJ	1a
	f						Cuando los hermanos estaban más chiquito, ella sí entendía muy bien el español pero su hermanito no	hermanito	child		ito	ito	no	N	2a
	f						Pero su papá no sabe nada de de ingl- español. Ni sus abuelitos	abuelitos			ito	ito	no	N	2a
	f						[una amiga] A ella nunca le hablo en inglés. /nunca/ Nunca, nada más palabritas. P	palabritas			ito	ito	no	N	1b
	f						Ahorita este año ha sido el mejor año.	ahorita			ito	ito	lex	ADV	ex
	f						Y ahorita ya tengo un programa que sigo.	ahorita			ito	ito	lex	ADV	ex
	f						Entonces ya ahoraita es más fácil	ahorita			ito	ito	lex	ADV	ex
	f						Por ejmplo en Navidad llevarles un pastelito a cada quien	pastelito			ito	ito	no	N	1a
	f						Todas esas cositas que a ellos, muchos (ch) de ellos no tienen família aquí o y eso los llena.	cositas			ito	ito	no	N	1b
	f						Pero ahorita ya estoy entrando también una etapa de mi vida que ya soy maestra, estoy de mesera pero tengo que estudiar.	ahorita			ito	ito	lex	ADV	ex
	f						Pero no sé o por ahorita estoy muy contenta aquí	ahorita			ito	ito	lex	ADV	ex
	f						Y lue(g)o fui a XY también una escuela chiquita charter school	chiquita		size	ito	ito	no	ADJ	1a
	f						Porque como son poquitas horas	poquitas			ito	ito	no	ADJ	1c
	f						Pero pues no quiero ser mesera pero por ahorita estoy bien porque no tengo hijos todavía estoy joven	ahorita			ito	ito	lex	ADV	ex
	f						Sí, porque estaba su hermano eras-era más tímida. Y ahorita o sea (…) Sí. Siempre está participando.	ahorita			ito	ito	lex	ADV	ex
CESA046	m	20-29	BA/BS	US	Mexico	Mexico	Ahorita trabajo en el XY en Florence y he estado trabajando por tres años allí.	ahorita			ito	ito	lex	ADV	ex
	m						sí eh pepper spray (P) lo usan muchas veces y también ahorita los- lo que me acaban de entrenar es um uh una pepper ball	ahorita			ito	ito	lex	ADV	ex
	m						que es como si fuera como una paint ball (P) pero las bolitas son de, de pepper so	bolitas			ito	ito	no	N	1a
	m						Um no tengo exactamente pistolas ahorita	ahorita			ito	ito	lex	ADV	ex
	m						Creo que trabaja um en los buses (P) de los niños chiquitos que ella tiene que asegurarse que los niños no se estén levantando porque sí para el el bus	chiquitos		child	ito	ito	no	ADJ	2a
	m						Pues no me acuerdo mucho porque obviamente porque pues estaba chiquito	chiquito		child	ito	ito	no	ADJ	2a
	m						ahorita tengo los planes de que um agarre ese trabajo nuevo	ahorita			ito	ito	lex	ADV	ex
	m						Porque me enfada tratar de quitar la carne de un pedacito de hueso.	pedacito			ito	ito	no	N	1a
	m						Um al mismo tiempo yo creo que también caminar un ratito en la playa	ratito			ito	ito	no	N	1c
	m						Um pues ahorita que la pienso ya que me moví para acá no- no me acuerdo mucho que me acuerdo mucho que me haya gustado mucho vivir allá	ahorita			ito	ito	lex	ADV	ex
	m						ya que me dio cuenta más ahorita que estoy viviendo más acá en Tucson creo que me gusta más las películas en inglé	ahorita			ito	ito	lex	ADV	ex
	m						Y: creo que el sabor que me gusta ahorita mucho son Skittles	ahorita			ito	ito	lex	ADV	ex
	m						Yo ahorita uso uh japanese cotton (P) porque um um sirve mucho más mejor para eso.	ahorita			ito	ito	lex	ADV	ex
	m						Ahorita uso un Elantra (P) dos mil once creo y bastantes mile- millas ya tiene pero	ahorita			ito	ito	lex	ADV	ex
	m						Que el contrato que quisiera tener ahorita sería como de tres meses para poder saber cómo es el trabajo	ahorita			ito	ito	lex	ADV	ex
	m						El apartamento ahorita que tengo yo creo que por- lo agarre por un contracto chico de seis meses para porque yo tengo planeado.	ahorita			ito	ito	lex	ADV	ex
	m						So (P) eso es ahorita principalmente lo que quisiera hacer	ahorita			ito	ito	lex	ADV	ex
CESA047	f	20-29	BA/BS in process	US	US	US	A veces se pone un poquito (…) chismoso	poquito			ito	ito	no	ADJ	1c
	f						Y después siempre vamos a caminar (…) para bajar un poquito	poquito			ito	ito	no	ADJ	1c
	f						mi papá entró a la casa a las siete o la ocho en la mañana (…) y me trajo un perrito	perrito			ito	ito	no	N	2a
	f						Setenta y siete al otro. Está viejo ya. Ay pobrecito	pobrecito			ito	cito	no	ADJ	2a
	f						Y (…) todos mis amigos eran mexicanos porque, te imaginas cuando estás chiquito todavía no estás en la escuela	chiquito		child	ito	ito	no	ADJ	2a
	f						Ahorita estoy leyendo// Sí leo, por ejemplo leo la biblia.	ahorita			ito	ito	lex	ADV	ex
	f						Entonces tiempo libre leo (…) novelas me gustan mucho por ejemplo ahorita estoy leyendo Anna Karenina por Tolstoy	ahorita			ito	ito	lex	ADV	ex
	f						Juego fútbol pero no bien. Me encanta porque lo jugué cuando era chiquita//	chiquita		child	ito	ito	no	ADJ	2a
	f						pero también empezar con—voy a empezar con ¿la mitad? Uno chiquito [¿triatlón? ]. Y luego ya. Uno grande.	chiquito		size	ito	ito	no	ADJ	1c
	f						Pues también cuando me—me dieron mi perrito también//	perrito			ito	ito	no	N	2a
	f						En la prepa….Sabía hablar perfectito [en español]. Pero como aquí no lo uso, casi nada.	perfectito			ito	ito	no	ADJ	1c
	f						De hecho ahorita estoy hablando mejor que hace un mes porque he estado en una clase de español	ahorita			ito	ito	lex	ADV	ex
	f						No sabes ahorita ya que estoy en clase de español, como unos veinticinco	ahorita			ito	ito	lex	ADV	ex
	f						No, es un poquito más caro, pero /sí/ de todas maneras está bien	poquito			ito	ito	no	ADJ	1c
CESA048	m	20-29	High School	US	Mexcio	Mexico	Sí ahí me la pasaba los dos meses con mis abuelos cuando era más chiquito	chiquito		child	ito	ito	no	ADJ	2a
	m						Los los gringuitos, /mhm/ XY XY. Así me llamaban a mi XY.	gringuitos			ito	ito	no	N	3a
	m						Pero es muy mansito. No muerde nada. [El perro]	mansito			ito	ito	no	ADJ	1c
	m						//Muchos perro así en la calle, ¿verdad? /sí/ Pobrecitos.	pobrecitos			ito	cito	no	ADJ	2a
	m						Y ahí nomás los ves todos flaquitos [los perros] te dan ganas de comprarles un taquito	flaquitos			ito	ito	no	ADJ	2a
	m						Y ahí nomás los ves todos flaquitos te dan ganas de comprarles un taquito	taquito			ito	ito	no	N	1c
	m						Y ponle que tú puedes llevar tu perro ahí para que te lo cuiden si te vas de vacaciones /mhm/ pero viejitos nomás hacen eso.	viejitos			ito	ito	no	N	3a
	m						Pues sí pe:ro ella va, va, así a descansar un ratito y ya se va a poner a trabajar otra vez pero no trabaja full time	ratito			ito	ito	no	N	1c
	m						Y uno y un chamaquito que su mama vendía asi	chamaquito	child		ito	ito	no	N	1c
	m						tenía una tiendita en su casa. Yo creo que le pegó a la XY en la escuela.	tiendita			ito	ito	no	N	1a
	m						Sí, ¿no tienes hermanos? Hermanitos, no sé. […] Pues tengo uno pero a me gustaría tener uno así como un año más chiquito que yo.	hermanitos	child		ito	ito	no	N	2a
	m						Pues tengo uno pero a me gustaría tener uno así como un año más chiquito que yo.	chiquito		child	ito	ito	no	ADJ	2a
	m						Hí con ese me la llevaba mucho desde morri- ese era mi mejor amigo desde cuando andaba chiquito.	chiquito		child	ito	ito	no	ADJ	2a
	m						no fue nada que /¿no?/ me importara mucho. Si sí a lo mejor algo chiquito.	chiquito		size	ito	ito	no	ADJ	1b
	m						No, andaba enfermo el s- domingo me enfermé muy feo calentura y nomás así poquita tos ahorita tengo	poquita			ito	ito	no	ADJ	1c
	m						No, andaba enfermo el s- domingo me enfermé muy feo calentura y nomás así poquita tos ahorita tengo	ahorita			ito	ito	lex	ADV	ex
	m						Pues sí, poquito. No lo puedo estirar todo. /¿qué:?/ No, y me truena a veces [el brazo]	poquito			ito	ito	no	ADJ	1c
	m						A mí me da miedo los los enanitos, así como la gente chiquita.	enanitos			ito	ito	no	N	3a
	m						A mí me da miedo los los enanitos, así como la gente chiquita.	chiquita		size	ito	ito	no	ADJ	1a
	m						Pero me la llevaba muy bien con su papás porque con su hermanito era yo me la llevaba muy bien	hermanito	child		ito	ito	no	N	2a
	m						Su hermanito no tan pue- tan tan hermanito, ¿me entiendes? /mhm/ También tiene como unos diecinueve dieciocho.	hermanito	child		ito	ito	no	N	3b
	m						No así de (..) más viejito pero tenía el millaje bajo. Y andaba bien arregladito el carro.	viejito			ito	ito	no	ADJ	1c
	m						No así de (..) más viejito pero tenía el millaje bajo. Y andaba bien arregladito el carro.	arregladito			ito	ito	no	ADJ	2a
	m						Tuvo que usar un carrito así medio feón por como casi dos años.	carrito			ito	ito	no	N	2b
	m						//Jí, está retacado aquí y luego se me hace que se ve medio placosón el carrito también	carrito			ito	ito	no	N	2b
	m						¿El el aceite ese es rojo? […] Y es-, ¿suena cuando así cuando andas manejando zzz? ¿Hace así como un ruidito?	ruidito			ito	ito	no	N	1c
	m						Puede estar duro [el volante] y a veces hace un ruidito zzzz. Puede estar duro. Si esta duro le falta.	ruidito			ito	ito	no	N	1c
	m						No, el aceite tiene que estar cafecito	cafecito			ito	cito	no	ADJ	1c
	m						Si chequeas el aceite si el aceite está café /aha/ el y el el palito todavía está bien	palito			ito	ito	no	N	1a
	m						¿Sí? Pues no es caro, nomás compra una manguerita y se la pones y ya	manguerita			ito	ito	no	N	1a
	m						Se te puede chingar el carro por si lo prendes en la mañanita mañanita.	mañanita			ito	ito	no	N	1c
	m						Una como dos años casi dos otra duré como un año pasadito	pasadito			ito	ito	no	ADJ	1c
	m						Y ahorita ni lo haces en el mundo, ¿no?	ahorita			ito	ito	lex	ADV	ex
	m						Esta vez que, porque hace poquito relativamente, ¿no?, también	poquito			ito	ito	no	ADV	1c
	m						Cla:ro, aha así estoy ahorita pues pero sí.	ahorita			ito	ito	lex	ADV	ex
	m						A ti te gustan así como los tipos que le gustan la XY los fachositos	fachositos			ito	cito	no	ADJ	3a
	m						: Pues no- ahorita no no lo he pensado pero (..) como van las cosas yo creo que sí, con el tiempo.	ahorita			ito	ito	lex	ADV	ex
	m						Ahorita no, ponle en unos años más	ahorita			ito	ito	lex	ADV	ex
	m						Sí pues ahorita no hay tiempo para casarse además es solo un papel	ahorita			ito	ito	lex	ADV	ex
CESA049	m	20-29	High School	US	Mexico	Mexico	Pues por ahorita nada más la.. la guitarra acústica	ahorita			ito	ito	lex	ADV	ex
	m						Um si es que cuando estaba más chiquito con el apenas iba empezando	chiquito		child	ito	ito	no	ADJ	2a
	m						Um pues sí- si van a ser lentos tenían que ser como un carro viejito como dicen en inglés “old school” (CC) o un carro clásico.	viejito			ito	ito	no	ADJ	2a
	m						: Um pues.. la verdad, ahorita estoy como dicen en inglés “desperate”	ahorita			ito	ito	lex	ADV	ex
	m						Um estoy abierta a opciones um pero desde chiquito he querido agarrar un- un Mustang	chiquito		child	ito	ito	no	ADJ	2a
	m						Um pues hasta ahorita um.. no tenemos fecha fecha pero más o menos queremos si estamos viendo de XY del XY	ahorita			ito	ito	lex	ADV	ex
	m						Um no queremos una boda muy grande pero tampoco no algo tan chiquito porque (…)	chiquito		size	ito	ito	no	ADJ	1c
	m						hasta ahorita eso es todo lo que tenemos plan- planeado	ahorita			ito	ito	lex	ADV	ex
	m						porque quie- hasta ahorita va ser una boda afuera y como las fotos um	ahorita			ito	ito	lex	ADV	ex
	m						so hasta ahorita va ser afuera y con familia y poquitas de la iglesia.	ahorita			ito	ito	lex	ADV	ex
	m						so hasta ahorita va ser afuera y con familia y poquitas de la iglesia.	poquitas			ito	ito	no	ADJ	1c
	m						Um de seguro- seguro va ser mi hermanito XY[nombre]	hermanito	child		ito	ito	no	N	2a
	m						El tipo de vestido no pero el color más o menos um ahorita estamos (...) um um pues nuestra meta o nuestro deseo, mejor dicho, es um como azul rey pero también hemos visto um azul	ahorita			ito	ito	lex	ADV	ex
	m						Pero está bien suave está bien bonito, no está muy cortita	cortita			ito	ito	no	ADJ	1c
	m						Um hasta ahorita no um el lugar en que- no lo hemos visto según lo íbamos a ver ahora pero	ahorita			ito	ito	lex	ADV	ex
	m						Pero… estábamos pensando algo como más central como cerquitas de la um uni- universidad más o menos pues porque ella ha vivido aquí pues	cerquitas			ito	ito	no	ADV	1c
	m						Si me gustaría um ahorita no estoy en la- en la escuela porque um mi primer año se complicó un poco por unas…	ahorita			ito	ito	lex	ADV	ex
	m						con el FAFSA y un pajarito, pero no quiero decir nombres, me como vivo en XY y mis papas no pues hacen mucho dinero	pajarito			ito	ito	no	N	3b
	m						y pues el pajarito me dijo que es cinco mil quinientos para cada semestre	pajarito			ito	ito	no	N	3b
	m						no agarre mucho dinero porque apenas empecé con el trabajo que tengo ahorita /um/ um… so	ahorita			ito	ito	lex	ADV	ex
	m						una vez se iba, se iba ir al parque con unos amigos y con mi hermanito	hermanito	child		ito	ito	no	N	2a
	m						pues nosotros crecimos desde chiquitos y so viene siendo como su segundo papá	chiquitos		child	ito	ito	no	ADJ	2a
	m						la guerra que tenemos ahorita, no no tiene caso no tiene razón	ahorita			ito	ito	lex	ADV	ex
	m						pues no sé le hace cuando estaba chiquito si quería pero ahorita no se no lo he pensado	chiquito		child	ito	ito	no	ADJ	2a
	m						pues no sé le hace cuando estaba chiquito si quería pero ahorita no se no lo he pensado	ahorita			ito	ito	lex	ADV	ex
	m						Y a mí pues se, agarré una idea bien, bien suave se me prendió el foquito pero	foquito			ito	ito	no	N	3b
	m						Sí me gustaría pagar lo que tengo que pagar ahorita	ahorita			ito	ito	lex	ADV	ex
	m						luego entrar otra vez pero cada ratito me anda hablando un un señor de allí	ratito			ito	ito	no	N	1c
	m						So (P) cada ratito anda, me anda recomendando para que me manden información pero	ratito			ito	ito	no	N	1c
	m						Porche que son carros pues más- más caros poquito más complicados so me gustaría,	poquito			ito	ito	no	ADJ	1c
	m						pues por ejemplo como ahorita trabajo en un call center	ahorita			ito	ito	lex	ADV	ex
	m						cada ratito dice que vamos a ir pero no desafortu- desafortunadamente no hemos podido por el dinero	ratito			ito	ito	no	N	1c
	m						por ejemplo hay en en la casa donde creció él y cuando yo era chiquito cuando iba mucho con mis abuelitos todavía esta allí	chiquito		child	ito	ito	no	ADJ	2a
	m						por ejemplo hay en en la casa donde creció él y cuando yo era chiquito cuando iba mucho con mis abuelitos todavía esta allí	abuelitos			ito	ito	no	N	2a
	m						y la abuelita de mi papa um también vive allí todavía	abuelita			ito	ito	no	N	2a
	m						Pues poquito de los dos um si, según dice mi mama así jugando pero celosa dice que- que mi papa tenía muchas novias y amigas	poquito			ito	ito	no	ADJ	1c
	m						para quitarme mi enojo so desde chiquito siempre mi papa me decía	chiquito		child	ito	ito	no	ADJ	2a
	m						Hasta ahorita si él me.. me puede hablar bien serio o regañarme	ahorita			ito	ito	lex	ADV	ex
	m						y pues um yo nunca conocí mi abuelito so cuando falleció él, era cuando nací yo	abuelito			ito	ito	no	N	2a
	m						Y xxx cuando estaba chiquito yo no sabía nada um no sé porque no me gustaba mi nombre	chiquito		child	ito	ito	no	ADJ	2a
	m						Hasta que un día mi-mi mama me dijo pues que antes que falleciera mi abuelito cuando tenía todos sus hijos	abuelito			ito	ito	no	N	2a
	m						y pues de todos mis tíos o de todos sus hermanos yo fui el primero so me nombraron departe de mi abuelito	abuelito			ito	ito	no	N	2a
	m						O yo fui el primero y pues yo siento que mi nombre es bien especial y he escuchado puras cosas buenas de de mi abuelito	abuelito			ito	ito	no	N	2a
	m						pues cuando se movió para acá um con mi-mi abuelita	abuelita			ito	ito	no	N	2a
	m						no no tenían um una como una rela- relación cercana de mama e hija pero le dijo mi abuelita pues que si- si se iban a venir para acá	abuelita			ito	ito	no	N	2a
	m						y me cuidaban me hicieron un gorrito también como los que se iban a graduar	gorrito			ito	ito	no	N	1a
	m						y… pues mi abuelita, cuando me gradué de la XY[nombre de escuela]	abuelita			ito	ito	no	N	2a
	m						um pues mi abu- mi abuelita sí. um sí sí sí se caso pues el señor desde chiquito nos decían que era mi tata Ramón	abuelita			ito	ito	no	N	2a
	m						um sí sí sí se caso pues el señor desde chiquito nos decían que era mi tata Ramón y mi tata Ramón y pues no estamos muy cercanos pero si tenemos un respeto	chiquito		child	ito	ito	no	ADJ	2a
	m						me imagino que sí. Y luego mi abuelita se llama XY	abuelita			ito	ito	no	N	2a
	m						el vestido de su hermanita porque um pues mis papas nunca me dejaban ir se xxx nerviosos si tengo que cruzar para um para XY	hermanita	child		ito	ito	no	N	2a
	m						um si, si es una ciudad chiquita um cuando fuimos, no mas fue pa su casa de su tía	chiquita		size	ito	ito	no	ADJ	1a
	m						luego fuimos a la tienda que estaba allí bien cerquitas y luego creo que la casa de su abuelita	cerquitas			ito	ito	no	ADV	1c
	m						luego fuimos a la tienda que estaba allí bien cerquitas y luego creo que la casa de su abuelita	abuelita			ito	ito	no	N	2a
	m						dicen que está creciendo, que ha crecido pero sí sí es un como un pueblito.	pueblito			ito	ito	no	N	1c
	m						todos decían que iban pa allá ‘pa Hermosillo, a Magdalena, Nogales y otros pueblitos que estaban en seguida de ese pueblo y no sé qué, y se me preguntaban a mí y yo no más que’ pa X	pueblitos			ito	ito	no	N	1a
	m						um sí, cuando esta- cuando estaba chiquito, antes de que sacara la- la licencia siempre decía	chiquito		child	ito	ito	no	ADJ	2a
	m						Un muscle car (P) o un un troque de los viejitos por ejemplo como un F un F cien de los: setenta pa bajo	viejitos			ito	ito	no	ADJ	2a
	m						los Toyotas los troquecitos como de los noventas o los nuevos como dos mil tres dos mil cinco puede tener muchas millas	troquecitos			ito	cito	no	N	1c
	m						pero he conocido viejitos con sus troques así bien viejitos	viejitos			ito	ito	no	ADJ	2a
	m						y yo"pues me gustaría tener un perrito primero".	perrito			ito	ito	no	N	1c
CESA050	f	20-29	BA/BS in process	US	US	US	Y es niño, si [risas] entonces como es hermanito y sobrino en los dos	hermanito	child		ito	ito	no	N	2a
	f						pues mi mama, porque es mamá soltera, y mis abuelos si, porque pues como mi mama me cuidó y a mis hermanas solita	solita			ito	ito	no	ADJ	2a
	f						hasta ahorita creo que estoy en- en la calle buena […] Pero, no, no creo que ... si, creo que estoy donde quiero estar ho	ahorita			ito	ito	lex	ADV	ex
	f						Ahorita no. No. Por si- yo tenía trabajo pero I just quit (EI) para tener muy- más tiempo de /de estudiar/ hacer otras cosas	ahorita			ito	ito	lex	ADV	ex
	f						y todo eso antes de los juegos de football (P) eso era un poquito difícil pero	poquito			ito	ito	no	ADJ	1c
CESA051	f	20-29	BA/BS in process	US	Mexico	US	Ahorita, um, estoy en clases generales, es mi primer semestre en the U of A	ahorita			ito	ito	lex	ADV	ex
	f						Y, ahorita estoy en español tres treinta y tres, um//	ahorita			ito	ito	lex	ADV	ex
	f						Tengo un mini, pruebita, mañana en acentos(...)	pruebita			ito	ito	no	N	1a
	f						Ahorita estamos en un (..) no pleito, pero él dijo que “Ocupa su tiempo de: niños:.”	ahorita			ito	ito	lex	ADV	ex
CESA052	m	20-29	BA/BS	US	Mexico	Iran	se parec-se parecía mucho a-al pueblit-al pueblito en que vivieron en-en /En México/ en Sinaloa	pueblito			ito	ito	no	N	1a
	m						[mis padres] aprendieron inglés muy (...) como de chiquito, en las escuelas entonces,	chiquito		child	ito	ito	no	ADJ	2a
	m						Sí, bueno (...) desde chiquito chiquito fue algo muy informal porque: en las escuelas hablaron inglés	chiquito		child	ito	ito	no	ADJ	2a
	m						Pero, ya con tres, cuatro años de vivir aquí (...) lo extraño un poquito no sé.	poquito			ito	ito	no	ADV	1c
	m						los mismos modos de vestir, sino con-con algunas diferencias muy-muy chiquitas	chiquitas		size	ito	ito	no	ADJ	1c
	m						Y aquí ahorita estamos en los Foothills (EI) donde: es como ochenta, noventa por ciento blanco	ahorita			ito	ito	lex	ADV	ex
	m						Y es igualito en Santa Bárbara porque, bueno Santa Bárbara hay el centro de Santa Bárbara donde el-se vive casi puros blancos	igualito			ito	ito	no	ADV	1c
	m						Guasave, Sinaloa, eso es el pueblito en que-en que a veces andamos y visitamos	pueblito			ito	ito	no	N	1a
	m						oh, ¿dónde está el-dónde-dónde hay oportunidades para trabajar fuera de-de este pueblito?"	pueblito			ito	ito	no	N	2b
	m						Entonces, ahorita nomás estoy trabajando, um (...) como treinta años a la semana	ahorita			ito	ito	lex	ADV	ex
	m						Mhm. Entre (...) bueno he visto: tan chiquito como siete o ocho años. [los niños]	chiquito		child	ito	ito	no	ADV	2a
	m						Y creo que lo que vamos a ver es que (...) como ahorita la gente (...) la gente que estamos dando acceso a la edu-educación	ahorita			ito	ito	lex	ADV	ex
	m						el mundo, se van a seguir con-con las sistemas que tenemos ahorita, ¿no?	ahorita			ito	ito	lex	ADV	ex
	m						Sí/ Y-y, bueno por eso, m-a-ahorita me dedico a-a un movimiento que empezó, bueno hace muchos años en otros países	ahorita			ito	ito	lex	ADV	ex
CESA056	f	20-29	BA/BS in process	U.S.	Mexico	Mexico	Sí, ya se graduó y- ahorita está haciendo su maestría.	ahorita			ito	ito	lex	ADV	ex
	f						Nogales es básicamente como un… México chiquito [risas] porque creo que es como la- el noventa por ciento de Nogales, Arizona es- pues son mexicanos	chiquito		size	ito	ito	no	ADJ	1c
	f						Emm creo que sí- sí hay mucha… inf- influencia mexicana pero- o sea creo que es básicamente porque estamos tan cerquita la frontera pero	cerquita			ito	ito	no	ADV	1c
	f						Pues: ahorita mi plan es o sea obvio tratar de- de que esta relación funcione	ahorita			ito	ito	lex	ADV	ex
	f						La verdad que Nogales es una ciudad muy- muy chiquita no hay, o sea, muchas partes donde puedas ir a divertirte	chiquita		size	ito	ito	no	ADJ	2b
	f						O sea si yo voy a Nogales, es nomás a ver a mis papás y ver a mis perritas y básicamente es todo.	perritas			ito	ito	no	N	2a
	f						mi- o sea mi concentración ahorita es español y poder tomar clases que a mí me gustan, creo que es algo-	ahorita			ito	ito	lex	ADV	ex
CESA060	f	20-29	BA/BS in process	U.S.	Mexico	Mexico	sí los camoteros tienen como una carreta, una carretita chiquita	carretita			ito	ito	no	N	1a
	f						sí los camoteros tienen como una carreta, una carretita chiquita	chiquita		size	ito	ito	no	ADJ	1a
	f						Um, ahorita, bueno, durante el tiempo de invierno cuando empieza la lechuga en- en - en Yuma	ahorita			ito	ito	lex	ADV	ex
	f						está viviendo en en San Diego ahorita pero, um, él va a moverse para acá y quiere estudiar en Pima	ahorita			ito	ito	lex	ADV	ex
	f						desde chiquita decía que iba a ser um una cirujana	chiquita		child	ito	ito	no	ADJ	2a
	f						a ser asistente de laboratorio así que quiero agarrar un poquita más de experiencia	poquita			ito	ito	no	ADJ	1c
	f						mi papá y mi mamá se adelantaron, un poquito antes- se- se adelantaron, pues, y dejaron dejaron la escuela	poquito			ito	ito	no	ADV	1c
	f						pero, casi no lo hablaba cuando era- cuando estaba más chiquita porque mis primos y mis hermanos siempre se burlaban de mí	chiquita		child	ito	ito	no	ADJ	2a
	f						Cuando era chiquita tenía nomás lo que se llama el canal cinco y era puro como El Chavo del ocho	chiquita		child	ito	ito	no	ADJ	2a
	f						todos los puertorriqueños que he conocido tienen como muy buena vibra así que ah digo el país ha de ser, pues, es un país chiquito es es una isla	chiquito		size	ito	ito	no	ADJ	1a
	f						cosas así pero escucho que la fonética está muy difícil así que me da un poquito miedo	poquito			ito	ito	no	ADJ	1c
	f						Sí, ahorita estoy tratando de entrar a una hermandad que es por latinas y muchas de ellas hablan español	ahorita			ito	ito	lex	ADV	ex
	f						sabes cómo ahorita estoy estudiando mucho sobre el pretérito	ahorita			ito	ito	lex	ADV	ex
	f						ahí, pues, ya era poquito menos porque los maestros ya no eran hispanos o o sea, muchos eran muy estrictos	poquito			ito	ito	no	ADJ	1c
	f						cosas así, porque desde chiquita también él me corregía todo el tiempo que no se dice así	chiquita		child	ito	ito	no	ADJ	2a
	f						pero sí les gusta hablar un poquito más formal	poquito			ito	ito	no	ADJ	1c
CESA062	f	20-29	BA/BS in process	U.S.	Mexico	Mexico	es un pueblito pequeñito, pequeñito donde no hay tiendas, no hay nada	pueblito			ito	ito	no	N	1a
	f						es un pueblito pequeñito, pequeñito donde no hay tiendas, no hay nada	pequeñito		size	ito	ito	no	ADJ	1a
	f						no hay nadie, nada, nada, nada como /mhm/ population is [CC] es como bien poquito	poquito			ito	ito	no	ADJ	1c
	f						como de una ciudad grande /mhm/ a un pueblito tan pequeñito.	pueblito			ito	ito	no	N	1a
	f						como de una ciudad grande /mhm/ a un pueblito tan pequeñito.	pequeñito		size	ito	ito	no	ADJ	1a
	f						so yo era como la gringuita de la escuela [the one who doesn't know how to Speak Spanish]	gringuita			ito	ito	no	N	3a
	f						me etiquetaron como la gringuita de la escuela porque no hablaba- sí lo hablaba el español pero lo hablaba muy pocho	gringuita			ito	ito	no	N	3a
	f						y sí era etiquetada como la gringuita pero era como verdad no acuerdo mucho de middle school pero it was good	gringuita			ito	ito	no	N	3a
	f						como una placita porque tiene: porque hay como una sección donde está como el cine	placita			ito	ito	no	N	1a
	f						y luego están como las tienditas más chiquitas	tienditas			ito	ito	no	N	1a
	f						y luego están como las tienditas más chiquitas	chiquitas		size	ito	ito	no	ADJ	1a
	f						y es: como eso como las placitas están más cercas esas tienditas que son como las más populares	placitas			ito	ito	no	N	1a
	f						y es: como eso como las placitas están más cercas esas tienditas que son como las más populares	tienditas			ito	ito	no	N	1c
	f						ir al cine y a caminar por las tienditas /qué tri:ste/ la verdad.	tienditas			ito	ito	no	N	1c
	f						parte donde estoy /chiquito/ está muy chiquito y luego hay otra cos--	chiquito		size	ito	ito	no	ADJ	1a
	f						Puras parcelas, pero como enfrentito de mi casa está la- la: elementary school	enfrentito			ito	ito	no	ADV	1c
	f						como ahí cruzando la calle literal vive mi hermano camino a la escuela todas las mañanas, él como--allí está cerquitas.	cerquitas			ito	ito	no	ADV	1c
	f						es como mi casa está en la pura esquinita y los están	esquinita			ito	ito	no	N	1c
	f						la verdad sí da miedito porque dicen que está haunted	miedito			ito	ito	no	N	1b
	f						tenemos una banquita como /para sentarse	banquita			ito	ito	no	N	1a
	f						Aha, es un pasillito, lo hizo como tip:o jardín mi papa	pasillito			ito	ito	no	N	1a
	f						se hace como un pasillito y en ese pasillito está una banca y allí mi mamá olvidó la banca, la, la bolsa la noche-	pasillito			ito	ito	no	N	1a
	f						no- es como- de que me acuerde yo de Chicago nomás es como detallitos así	detallitos			ito	ito	no	N	1c
	f						y estamos hasta la noche o el domingo en la mañanita	mañanita			ito	ito	no	N	1c
	f						No, pues, que una carn- una carne asada en la casa de mi abuelita	abuelita			ito	ito	no	N	2a
	f						la casa de mi abuelita que en paz descanse es donde se juntan todos	abuelita			ito	ito	no	N	2a
	f						ahí en la casa de mi abuelito, todos, todos se juntan,	abuelito			ito	ito	no	N	2a
	f						y si se juntan en la casa de mi abuelita es como fiesta ya	abuelita			ito	ito	no	N	2a
	f						y se empiezan a hablar a todos los hermanos y ya terminan todos en la casa de mi abuelita	abuelita			ito	ito	no	N	2a
	f						Madrid y Alcalá de Henares, el pueblito donde estábamos, estamos a treinta minutos de Madrid	pueblito			ito	ito	no	N	1a
	f						Ciento treinta dólares, bueno, yo lo que más gasté y, y eso fue como con poquito tiempo de: de comprarlo	poquito			ito	ito	no	ADJ	1c
	f						“Ah pues yo estoy trabajando con niños ahorita y es como esto esto y esto, y esto”	ahorita			ito	ito	lex	ADV	ex
CESA063	f	20-29	BA/BS in process	U.S.	Mexico	Mexico	Es como ahorita no soy decidida en lo que quiero hacer so	ahorita			ito	ito	lex	ADV	ex
	f						y aparte me mudé so tuve que regalarlo y la verdad lo extraño mucho mi gordito [el perro]	gordito			ito	ito	no	ADJ	2a
	f						y sí hubo ocaciones en los cuales yo lo tenía suelto en un parquecito	parquecito			ito	cito	no	N	1a
	f						Los empezó a morder porque los perritos pues seguían por todos lados	perritos			ito	ito	no	N	1a
	f						allí tenían los cochitos en seguida the neighbors y los caballitos	chochitos			ito	ito	no	N	2a
	f						allí tenían los cochitos en seguida the neighbors y los caballitos	caballitos			ito	ito	no	N	2a
	f						La perra la perra la mama desde chiquita algo tenía siempre era muy miedosa like (EI) desde chiquita no se dejaba tocar	chiquita		child	ito	ito	no	ADJ	1c
	f						La perra la perra la mama desde chiquita algo tenía siempre era muy miedosa like (EI) desde chiquita no se dejaba tocar	chiquita		child	ito	ito	no	ADJ	1c
	f						pero desde chiquita se escondía se escondía	chiquita		child	ito	ito	no	ADJ	1c
	f						Pues sí no sé era otra mezcla también. Era una perrita muy bonita pero /okey/	perrita			ito	ito	no	N	2a
	f						Mis papás siempre nos llevaban a a la playa allí al Bay area o allí en el lagito que existía alrededor de mi casa.	lagito			ito	ito	no	N	1a
	f						y nomás me sentí en la carrilla de mi hermanito	hermanito	child		ito	ito	no	N	2a
	f						la montaña no tenía como escalones eran puras piedras que subías pues sí tenía como un caminito chiquito pero la mayoría era pura piedra que escalabas.	caminito			ito	ito	no	N	1a
	f						la montaña no tenía como escalones eran puras piedras que subías pues sí tenía como un caminito chiquito pero la mayoría era pura piedra que escalabas.	chiquito		size	ito	ito	no	ADJ	1a
	f						me entiendes están muchas pies arriba y ves a las personas chiquitas	chiquitas		size	ito	ito	no	ADJ	1c
	f						pero no sé estar bailando mucho es una cosa que muy ha funcionado de chiquita me encanta	chiquita		child	ito	ito	no	ADJ	2a
	f						Um cuando estaba chiquita se me hace que a los… once o a los diez años mi mamá metió en una clase de belly dancing	chiquita		child	ito	ito	no	ADJ	2a
	f						Y si se veían muy clarito las estrellas	clarito			ito	ito	no	ADJ	1c
	f						el agua bien azul y clarita [en Cancún]	clarita			ito	ito	no	ADJ	1c
	f						cosas sencillitas pues la verdad le tocó suerte porque yo sé que hay muchos pretadores allí afue:ra	sencillitas			ito	ito	no	ADJ	1c
	f						Mi hermana y mi hermanito los dos así y yo no	hermanito	child		ito	ito	no	N	2a
	f						Ooh los tacos de carne asada, de de- no sé, de puerquecito	puerquecito			ito	cito	no	N	1c
	f						De cabecita como que no [los tacos]	cabecita			ito	ito	no	N	1c
CESA065	m	20-29	BA/BS	U.S.	Mexico	U.S.	ahí me he desarrollado más y ahorita ya soy asesor y lo bueno que aun mantengo mi	ahorita			ito	ito	lex	ADV	ex
	m						siento que estoy ganando ahorita en la vida	ahorita			ito	ito	lex	ADV	ex
	m						pero, pero sí de eso me recibí pero ahorita	ahorita			ito	ito	lex	ADV	ex
	m						pero para eso también hay que ex -expander un poquito más este desarrollarme un poquito más en tipo research	poquito			ito	ito	no	ADV	1c
	m						todo ese tipo de cosas pero to-todo a su tiempo, paso a paso, pero ahorita ahí, ahí va.	ahorita			ito	ito	lex	ADV	ex
	m						xxx si te queda una rebanada ni modo la doblas ahí porque es lo que vas a comer ese día [risas] mijito	mijito			ito	ito	no	N	2a
	m						este levantarme y sabiendo iba a estar planchadita mi ropa	planchadita			ito	ito	no	ADJ	1c
	m						al cine a ver la película esa del Eugenio Derbez de la niña güerita esa que ya quisiera el bato tener una hija güerita	güerita			ito	ito	no	ADJ	3a
	m						ella lo admite enfrente de todo, admítelo ahorita, no está aquí	ahorita			ito	ito	lex	ADV	ex
	m						astan están mintiendo este a ustedes mismos o que compras el paquetes nomas cortas los cuadritos	cuadritos			ito	ito	no	N	1a
	m						Sí, sí cocino cosas normal que me aviento mi-mis pollitos ahí,	pollitos			ito	ito	no	N	1b
	m						pues le pones un poquito de miel y nutella y todo bien pero aquí la exagerada	poquito			ito	ito	no	ADJ	1c
	m						con un montón de selfies no, el coloseo atrás en el selfie [risas] /no lo dudo, no lo dudo/ cara de patito también [risas] hacienda seña de paz.	patito			ito	ito	no	N	3b
	m						siempre hay una ventana siempre hay un huequito	huequito			ito	ito	no	N	1a
	m						como sea posible así que yo en un futuro sí me veo como psicólogo ya de viejito no quiero seguir oyendo problemas de la gente quizá	viejito			ito	ito	no	ADJ	2a
	m						ahorita somos muy jóvenes es no no	ahorita			ito	ito	lex	ADV	ex
	m						pero si sí, mijita, llévame a Guadalajara mínimo	mijita			ito	ito	no	N	2a
CESA067	m	20-29	BA/BS	U.S.	U.S.	U.S.	Con un minor (EI), con dos minors (EI) en español y nutrition (EI) […] Ahorita nada	ahorita			ito	ito	lex	ADV	ex
	m						Sí, cuando estaba chiquito, queri-quería ir no sé por qué no	chiquito		child	ito	ito	no	ADJ	2a
	m						Sí, como mi-mi nana, mi tata, mi abuelita	abuelita			ito	ito	no	N	2a
	m						No tengo trabajo si /si te vas/ si me voy, ahorita me xxx y no	ahorita			ito	ito	lex	ADV	ex
	m						No es algo como alrededor de- de mi abuelito y abuelita	abuelito			ito	ito	no	N	2a
	m						estaban como en la casa de mi nana y mi tata, en la casa de mi abuelito y abuelita	abuelita			ito	ito	no	N	2a
	m						Mi abuelito y abuelita son los papás de mi papá	abuelito			ito	ito	no	N	2a
	m						pero cuando se murió mi-mi abuelito, mucho de los xxx murió murió con el.	abuelito			ito	ito	no	N	2a
	m						fui- íbamos con mi abuelito y mi abuelita	abuelito			ito	ito	no	N	2a
	m						porque mi abuelito y mi abuelita no más tuvieron niñas	abuelito			ito	ito	no	N	2a
	m						todos los que pudieran iban a la casa de mi ab-abuelito y mi abuelita pero con tiempo, todos se se falleció	abuelito			ito	ito	no	N	2a
	m						Mis pollitos. Así, hay unas personas que me ven que ¿“tus niños?” o soy entrenador de-de la lucha, no-no	pollitos			ito	ito	no	N	2a
	m						Sí, cuando estaba chiquito, queri-quería ir no sé por qué no, no, no hice esto, pero quería ir al escuela	chiquito		child	ito	ito	no	ADJ	2a
CESA070	m	Under 20	BA/BS in process	U.S.	Mexico	Mexico	Quisiera decir que cuando yo era chiquito no teníamos celulares	chiquito		child	ito	ito	no	ADJ	2a
	m						Hasta ahorita de los libros que he leído que son muy pocos es (…) el alquimista por Paulo Coelho.	ahorita			ito	ito	lex	ADV	ex
	m						sí me da un poquito de- de terror, pero no suficiente para xxx	poquito			ito	ito	no	ADJ	1c
	m						Uhm, hasta ahorita me estoy dando cuenta que, de veras, más y más es lo que quiero hacer	ahorita			ito	ito	lex	ADV	ex
	m						Sí, uhm, no te podría decir algunas ahorita pero me imagino que sí hay bastantes.	ahorita			ito	ito	lex	ADV	ex
	m						sí los niños ahora tienen las Ipads y las tablets así es que tienen la costumbre de cortar todo a las xxx mas chiquitas que pueden	chiquitas		size	ito	ito	no	ADJ	1a
	m						una cita especialmente romántica iría a ir a jugar mini golf uhh, Funtastics o golfito como se le llama.	golfito			ito	ito	no	N	1c
	m						Mi:, Uhm mi tipo de comida favorita ahorita es la comida hindú	ahorita			ito	ito	lex	ADV	ex
	m						me dijeron “ahorita mandamos a alguien.”	ahorita			ito	ito	lex	ADV	ex
CESA071	m	20-29	BA/BS in process	U.S.	Mexico	Mexico	Ahorita juega con los Chicago… Bears.	ahorita			ito	ito	lex	ADV	ex
	m						Entonces feria hay. Feria, xxx. Entonces por ahorita está bien. Pero sí me quiero ir ya.	ahorita			ito	ito	lex	ADV	ex
	m						Pues llevo muy poquito ahí	poquito			ito	ito	no	ADJ	1c
	m						No, ahorita-ahorita nada. Ahorita… Ando bien soltero la neta. ¿Cuál es tu profe para esta clase?	ahorita			ito	ito	lex	ADV	ex
	m						“Me parece. Invitas al pisto ese día tú”. Y luego dice “Las pistolitas para la alberca, o qué”	pistolitas			ito	ito	no	N	1c
	m						Perforar la piel de los dientitos que tiene	dientitos			ito	ito	no	N	1a
	m						Ahorita tiene como unos… ¿qué será? Un año, ¿dos?	ahorita			ito	ito	lex	ADV	ex
	m						[pregunta de entrevistadora: ¿Estás sangrando?] Poquito no más.	poquito			ito	ito	no	ADJ	1c
	m						Ahorita que se brinque de tu cabeza al suelo	ahorita			ito	ito	lex	ADV	ex
	m						Pero pobrecito que se la pasa encerrado ahí	pobrecito			ito	cito	no	ADJ	2a
	m						Y los periquitos, ¿que les pasó?	periquitos			ito	ito	no	N	1a
	m						Pues es que ahorita me ando…. No ando al cien.	ahorita			ito	ito	lex	ADV	ex
	m						No, es que ya es bien tarde y ahorita ya lo único que se hablan son incoherencias	ahorita			ito	ito	lex	ADV	ex
	m						Si tus cuentas y ahorita me cobran 60 dólares al mes de cuentas,	ahorita			ito	ito	lex	ADV	ex
CESA072	f	Under 20	BA/BS in process	U.S.	Mexico	Mexico	como casi todos mis amigos fueron a ASU /mhm/ en Tempe. E--y está por aquí está como poquito (…) como hay mucha crimen aquí /sí/ eso me da miedo [risas]. (…)	poquito			ito	ito	no	ADV	1c
	f						más o menos pero has-y hasta ahorita no	ahorita			ito	ito	lex	ADV	ex
	f						nomás la ayuda así y le puedo hacer este pago, cosas así, bien chiquitas	chiquitas		size	ito	ito	no	ADJ	1b
	f						pero obviamente ahorita él y mi mamá ya son- sí son legalmente ciudadanos	ahorita			ito	ito	lex	ADV	ex
	f						Uh sí tengo un carro, es poquito viejo	poquito			ito	ito	no	ADJ	1c
	f						sí me gu- es chiquito y es gris y sí me gusta mucho y me gustó manejarlo en high school	chiquito		size	ito	ito	no	ADJ	1c
	f						ahora que estoy manejando a Tucson a Phoenix a como cada fin de semana es como poquito difícil	poquito			ito	ito	no	ADJ	1c
	f						como había algo que pasó en mi carro como algo que se explotó un poquito	poquito			ito	ito	no	ADJ	1c
	f						Y entonces mi carro como se: (…) se tumbó un poquito ayer	poquito			ito	ito	no	ADV	1c
	f						y por eso como a veces sí me gusta que manejan más despacio porque es más el terreno es más difícil un poquito	poquito			ito	ito	no	ADJ	1c
	f						Uh pues ahorita estoy (…) estudiando uh	ahorita			ito	ito	lex	ADV	ex
	f						No fue tan como horrible como el primer día. Y como y: vimos que muchos animales ahorita que están embarazados	ahorita			ito	ito	lex	ADV	ex
	f						eso es como otros cuatro años entonces hasta ahorita tengo como nueve años de escuela que me faltan	ahorita			ito	ito	lex	ADV	ex
	f						Sí. Estoy hasta ahorita	ahorita			ito	ito	lex	ADV	ex
	f						lo que dicen porque- pues sí y: es como mas es más chiquito que como en la factoría grande	chiquito		size	ito	ito	no	ADJ	1a
	f						y entonces y hay muchas razones ahorita estoy pensando si	ahorita			ito	ito	lex	ADV	ex
	f						Y: pues ahorita estoy pensando y también como	ahorita			ito	ito	lex	ADV	ex
	f						que estoy pensando ahorita y como que es más difícil conseguir lo que necesito estoy como ahorita casi uh estoy bien cansada	ahorita			ito	ito	lex	ADV	ex
	f						ue necesito estoy como ahorita casi uh estoy bien cansada	ahorita			ito	ito	lex	ADV	ex
	f						como ahorita me encontrastes en un lugar que es o estoy como estoy preguntando	ahorita			ito	ito	lex	ADV	ex
	f						con los otros niños cuando era chiquito	chiquito		child	ito	ito	no	ADJ	2a
	f						pues sí sé sufi-suficiente español para comunicarme como ahorita	ahorita			ito	ito	lex	ADV	ex
	f						era como cosas chiquitas como oh se olvidó de estaba que en nuestro aniversario de dos meses algo así	chiquitas		size	ito	ito	no	ADJ	1a
	f						Es lo que yo estoy pensando ahorita que, no me gusta	ahorita			ito	ito	lex	ADV	ex
	f						porque ella fue como- su familia fue poquito más educada que su familia	poquito			ito	ito	no	ADJ	1c
	f						pero español todos los tenemos, aunque es poquito diferente.	poquito			ito	ito	no	ADJ	1c
CESA073	f	20-29	BA/BS in process	U.S.	Mexico	U.S.	Fuego. [risas] Mmm (...) No más XXX es fuego que tiene walnut (EI) /¿Sí?/ Mhm. Poquito, pero /XXX no tiene?/. (...)	poquito			ito	ito	no	ADJ	1c
	f						XXX ahorita es mejor. XXX dinero XXX (...) Mmm. Lo que me estaba diciendo la XY es que van a dar como /¿la quién/ XY	ahorita			ito	ito	lex	ADV	ex
	f						Mmm no más ver a la vieji-al-la-al viejito mmm	viejito			ito	ito	no	N	3a
	f						¿Qué clases tienes ahorita? [pregunta a entrevistadora]	ahorita			ito	ito	lex	ADV	ex
	f						La podemos hacer ahorita, la podemos empezar	ahorita			ito	ito	lex	ADV	ex
	f						Si buscamos-lo voy a buscar ahorita	ahorita			ito	ito	lex	ADV	ex
	f						Porque quiero tomar todas las clases difíciles ahorita	ahorita			ito	ito	lex	ADV	ex
	f						Uno con la-o dos con la chinita y uno con my internship	chinita			ito	ito	no	ADJ	3a
	f						ahorita, pues está via-va a viajar, pero (...) está viajando mucho	ahorita			ito	ito	lex	ADV	ex
	f						A lo mejor necesita dinero también ahorita	ahorita			ito	ito	lex	ADV	ex
	f						Empieza a llorar XXX como una niña chiquita.	chiquita		child	ito	ito	no	ADJ	2a
CESA076	f	20-29	BA/BS	U.S.	U.S.	U.S.	por mi pero, y mi hermano tenía un hijo pero se murió cuando estaba chiquito	chiquito		child	ito	ito	no	ADJ	2a
	f						No, um- desde el- desde que murió mi sobrino y mi abuelito	abuelito			ito	ito	no	N	2a
	f						tengo- soy en clase ahorita, cuando nomás nomás estamos en clase un día a la semana	ahorita			ito	ito	lex	ADV	ex
	f						No, no. Tenemos un perrito pero (risas)	perrito			ito	ito	no	N	2a
	f						pero creo creo que ahorita es ilegal en todos los estados pero no sé	ahorita			ito	ito	lex	ADV	ex
	f						sí, no, es, incluye a todos, en vez de el clima que tiene ahorita	ahorita			ito	ito	lex	ADV	ex
	f						Que no lloré mucho, que estaba bien calladita, but um, sometimes if I deserved the chancla then /sí/	calladita			ito	ito	no	ADJ	1c
	f						Um, en Hermosillo, poquito más pobre	poquito			ito	ito	no	ADJ	1c
	f						Las chinitas que you know, they’re just talking about something you don’t know	chinitas			ito	ito	no	ADJ	3a
CESA077	f	40-49	BA/BS in process	U.S.	U.S.	Mexico	Por muchos años fui la más chiquita	chiquita		child	ito	ito	no	ADJ	2a
	f						Acostumbro a comprarles un detallito a todos mis hijos	detallitos			ito	ito	no	N	2a
	f						Ahorita te voy a decir [risas] cómo se llama exactamente.	ahorita			ito	ito	lex	ADV	ex
	f						Así es que un poquito de todo. Me mantengo ocupada.	poquito			ito	ito	no	ADV	1c
	f						Poquito de todo. Me gusta me gusta leer MUCHO /mhm/	poquito			ito	ito	no	ADV	1c
	f						Ahorita yo creo que tenemos como un mes que no nos vemos ya.	ahorita			ito	ito	lex	ADV	ex
	f						a unas de ellas las veo una vez, a veces, una vez al año, a veces un poquito más	poquito			ito	ito	no	ADV	1c
	f						estaban sentados bien calladitos y decidimos no meternos	calladitos			ito	ito	no	ADJ	1c
	f						y fuimos a escuchar la música en vivo un ratito	ratito			ito	ito	no	N	1c
	f						Tuve esa pregunta hace poquito y no me pude acordar por más que quise	poquito			ito	ito	no	ADV	1c
	f						Sé un poquito de sign language	poquito			ito	ito	no	ADV	1c
	f						y la muchacha traía un carro MUY viejito	viejito			ito	ito	no	ADJ	2a
	f						pero lo traía MUY enterito, muy limpiecito	enterito			ito	ito	no	ADJ	2a
	f						pero lo traía MUY enterito, muy limpiecito	limpiecito			ito	cito	no	ADJ	2a
	f						uhm, no se me viene ahorita ni uno a la mente	ahorita			ito	ito	lex	ADV	ex
	f						Deste, uhm, te puedo decir que yo hablaba el español muy diferente a como me o- escuchas hablarlo ahorita	ahorita			ito	ito	lex	ADV	ex
	f						hay tantos países ahí cerquitas que todos los que pudiéramos /mhm/ conocer ahí cerquitas sería ideal	cerquitas			ito	ito	no	ADV	1c
	f						hay tantos países ahí cerquitas que todos los que pudiéramos /mhm/ conocer ahí cerquitas sería ideal	cerquitas			ito	ito	no	ADV	1c
	f						Uhm, hablábamos, hablé el español primero pero muy chiquita empecé hablar el inglés	chiquita		child	ito	ito	no	ADJ	2a
	f						ya estaba yo aprendiendo inglés desde chiquita para cuando yo empecé la escuela	chiquita		child	ito	ito	no	ADJ	2a
	f						Entonces, sí pienso que que hablo mejor /mhm/ el inglés que el español /mhm/, pero muy muy pegaditos /uh huh/, e- e- en mi opinión.	pegaditos			ito	ito	no	ADJ	1c
CESA078	m	20-29	BA/BS in process	U.S.	Mexico	Mexico	En Nogales se ve un poquito menos vulgaridad	poquito			ito	ito	no	ADJ	1c
	m						y sé que es un poquito difícil porque muchas generaciones nuevas de	poquito			ito	ito	no	ADJ	1c
	m						La escuela también estaría-- sería perfecto que la escuela, um, enforzara un poquito más el	poquito			ito	ito	no	ADV	1c
	m						Ahorita yo trabajo en un lugar donde se llama XY trabajo en la XY	ahorita			ito	ito	lex	ADV	ex
	m						esta ocasión, um, se manejó un poquito mejor	poquito			ito	ito	no	ADV	1c
	m						Sí, um, de hecho, una-- un ejemplo, una señora-- dos señoras, de hecho, un poquito ma-- d-- de mayor edad	poquito			ito	ito	no	ADJ	1c
	m						Pues, el más caro que hemos recibido hasta ahorita era una Gibson	ahorita			ito	ito	lex	ADV	ex
	m						. Um, es una de las más caras que me acuerdo (…), hasta ahorita	ahorita			ito	ito	lex	ADV	ex
	m						De-- estaba en-- en diferentes grupos, ahorita nomás toco en la iglesia	ahorita			ito	ito	lex	ADV	ex
	m						Fu-- era un poquito, um, más alto el nivel de-- de músic	poquito			ito	ito	no	ADJ	1c
	m						Um, he estado-- he estado-- ahorita estoy en-- se puede decir en algunos	ahorita			ito	ito	lex	ADV	ex
	m						Ahorita estamos a más o menos 19 integrantes en ese coro	ahorita			ito	ito	lex	ADV	ex
	m						eventos un poquito más grandes, eventos, retiros, cosas así.	poquitos			ito	ito	no	ADJ	1c
	m						Um, horita en particular estoy ayudando, pues, soy coordinador de un grupo de jóvenes adultos en XY, Tucson	horita			ito	ito	lex	ADV	ex
	m						Um, pues lo que me tocó aquí en Tucson, um, como ya era joven adulto, era un español un poquito más avanzado	poquito			ito	ito	no	ADJ	1c
	m						Pues, un poquito de información mía es que a mí nunca me enseñaron a leer ni a escribir español	poquito			ito	ito	no	ADJ	1c
	m						Considero que mi español ahorita sí s--se encuentra a medias	ahorita			ito	ito	lex	ADV	ex
	m						No. Ya-- antes no-- me molestaba poquito. Me sentía inseguro, pero hoy en día [que alguien más te corrija tu habla]	poquito			ito	ito	no	ADV	1c
	m						Antes los visitaba más. Ahorita tal vez voy (...) de hecho, hace mucho que no voy. Um, creo que más del año.	ahorita			ito	ito	lex	ADV	ex
	m						[pregunta de entrevistadora: risa] ¿Y cuál es tu fiesta, como holiday (EI), favorito?] Um (…), creo que sería Navidad ahorita	ahorita			ito	ito	lex	ADV	ex
	m						En Nogales por ser un pueblo un poco más chiquito	chiquito		size	ito	ito	no	ADJ	1a
	m						[pregunta de entrevistadora: ¿Y en qué idiomas tocan? ¿Inglés? ¿Español?] Horita español, nomás.	horita			ito	ito	lex	ADV	ex

## Sheet: Pequeño data set
CESA001	Setence where token occurred	Token	Semantic Sense
	Tengo otra uh, hermana que es más chica que yo.	chica	child
	Pero [20:00] en esa casa, está bien chica	chica	size
	So, la casa está chica pero siempre allí estuvimos	chica	size
	yo me acuerdo, estuvo chica la casa.	chica	size
	So, e- era casi igual como cuando yo estaba chica	chica	child
CESA004	Me gusta lo chico de Tucson (llana).	chico	size
	Aunque también me gusta (…) porque es una ciudad chica	chica	size
CESA005	No sé, cuando yo era pequeña, yo siempre decía que iba a tener la yuna- la universidad, que iba a tener mi licenciatura en cualquier carrera	pequeña	child
CESA006		0
CESA007		0
CESA009	Si yo hubiera hecho eso cuando yo estaba más (…) pequeña pues (…) no	pequeña	child
CESA011	Fueron los (CC) leaders y después de ahí como a los, las personas más chicas, a: tomaban las fotos	chicas	size
	Ah, no:. Ahorita no, a, e, cuando, ah estaba chica, fui católica /mhm/ pero no me gustaba	chica	child
	Pue:s (...) cuando estaba chica, na- más fui (...) um, nada más fui yo:, y mi mamá y mi papá, pero sí tengo hermanos mayores	chica	child
	Y cuando estaba chica le d-, um, ella (...) lo que le pasó es que ella tuvo lupu:s, /mm/ POR el estrés	chica	child
	Como: sí me enseñó cuando estaba chica, pero no me recuerdo.	chica	child
	por lo menos yo cuando estaba chica, dicía las cosas en inglé:s,	chica	child
	Y sí como cuando de chica no sabía muy bien el españo:l,	chica	child
CESA013	sí, me imagino que que Obregón es más pequeño que Hermosillo, pero no sé,	pequeño	size
	I mean (CC) cuando estaba chica sí, íbamos, los miraba, los visitab	chica	child
	el bilingüismo es mucho más grande hoy que fue cuando yo estaba chica.	chica	child
CESA016	pero en dos ocasiones entra la hija pequeña de la partómo lo pronuncias y así pero sí quisiera mejorar mi español	pequeña	child
CESA018	sí me gusta mucho, y hay otros centros, hay uno en Phoenix, hay uno en Las Cruces… y creo que hay uno pequeño en Nogales	pequeño	size
	y sí, cuando estábamos um pequeñas creo que sí (…) no me acuerdo yo (…) XY yo creo que sí se acuerda	pequeñas	child
	me acuerdo que cuando estábamos pequeñas teníamos un Nintendo (PE)y pues el Mario	pequeñas	child
	pues el solo hecho de que el español nunca lo llevamos cuando estábamos pequeñas	pequeñas	child
CESA020	La high school (PI) (...) no era exactamente en XY, pero la ciudad era tan pequeña	pequeña	size
CESA021	NO, uno, uno de chico no- no- no piensa a veces las cosas.	chico	child
	Más chico no sabia uno como era mantener una casa.	chico	child
	YO me acuerdo de mas chico había un señor, un jugador, que en aquellos tiempos se llamaba XY.	chico	child
	Eh- es que la verdad, e:, ese es un problema que desde chico tú ves las cosas y ves las cosas muy feas.	chico	child
CESA022	No sé que será pero allí, allí está cuidando de niños, um, pequeños	pequeños	child
	Y tengo un hermano más pequeño que él que acaba de cumplir diecisiete años	pequeño	child
	Ehm, mi hermano pequeño está en la high school.	pequeño	child
	la gente me dice que yo lo hablo con un, un pequeño acento el inglés pero, o sea, yo no lo escucho	pequeño	size
CESA023		0
CESA024		0
CESA025	ELLA estaba muy preocupada porque (…) una gringuita en en Quesada, que es (…) es un, pueblito (…) pequeño	pequeño	size
	pues una fiesta (…) casi, que está pequeño /mhm/ con la familia y amigos y (…) p	pequeño	size
CESA027	Pues, me gustan mis clases de español, um es como la (...) porque los clases son más pequeños	pequeños	size
	mis padres se separaron cuando fui muy muy chica	chica	child
CESA028		0
CESA031		0
CESA033	Son muy con e:h como se dice pueblitos muy chicos	chicos	size
	Uhm de chico también no salíamos mucho, pero ya cuando estábamos en la en la uhm en high school (	chico	child
	Sonora los metieron le dicen el cerumen que ese era como la la uhm la cárcel de niños chicos, ¿no?	chicos	child
	Comparado cuando yo estaba chico era los adultos.	chico	child
	Pero también le sirve que como de más chicos mi mi niño nunca fue a preschool (P).	chicos	child
	Yo creo que de chico a mí y a mí hermano, nos regalaron un eh un carro de eso chicos, ¿no?	chico	child
	Yo creo que de chico a mí y a mí hermano, nos regalaron un eh un carro de eso chicos, ¿no?	chicos	size
	Está muy chico que no entiende que le estamos tratando de enseñar [talks about a child]	chico	child
	Sí pues yo creo pues como nací en una comunidad tan chica Nogales aquí en Tucson si necesitas ir a los mandados	chica	size
	Y a su hija mas chica también. mi tía.	chica	child
CESA034	Mi, mi mamá es de un pueblo, pueblo pequeño, no…casi no hay servicios	pequeño	size
	“No, cómprale a, a mis hermanos, ellos están pequeños, /uhum/ que disfruten tener cosas.	pequeños	child
	sí he notado que su español no es tan, tan bueno /uhum/, como cuando eran más pequeños /uhum/, hablaban mucho mejor.	pequeños	child
	pero los aztecas so:lo fuero:n una pequeña parte en la area de la Ciudad de México,	pequeña	size
	pues yaqui, o así de otra la tribu máS /aha/ pequeña /sí/, todos son mexicas	pequeña	size
CESA036		0
CESA037	Adaptar así de... Yeah, y luego veo que son los niños más pequeños que adoptan más rápido a la tecnología.	pequeños	child
	Y antes cuidaba unos niños y el niño más pequeño de ese tiempo a dos años	pequeño	child
CESA038	No pues porque xxx pues de xxx pero antes era más chico nosotros íbamos dos o tres veces al año.	chico	child
CESA041		0
CESA042	Me gustaría tal vez no fuera tan caliente. Pero me gusta porque es como, es chico	chico	size
CESA043		0
CESA044	Ah bueno mi papá se dedica a (CC) XY él lo ha hecho desde chico, desde que llego a los Estados Unidos y mi mamá es ama de casa	chico	child
	Soy el del medio. Tengo una hermana chica de once años.	chica	child
	Yo creo que siendo una ciudad más chica tienes la oportunidad de acercarte más a tu comunidad	chica	size
CESA045	Y lue(g)o fui a XY también una escuela chiquita charter school (P) muy pequeña para hacer también permanente sub (P).	pequeña	size
	Aunque a lo mejor en su casa cuando eran chicos pues no era un evento muy grande [el Día de los Muertos]	chicos	child
CESA046	Y sí ocupo tomar um tener un trabajo chico, pienso que simplemente tomaría otro trabajo en un restaurante chico	chico	size
	Y sí ocupo tomar um tener un trabajo chico, pienso que simplemente tomaría otro trabajo en un restaurante chico	chico	size
	El apartamento ahorita que tengo yo creo que por- lo agarre por un contracto chico de seis meses para porque yo tengo planeado	chico	size
CESA047	los regalos, y los abrimos en orden de edad. Entonces yo soy la más chica entonces yo abro primero	chica	child
CESA048		0
CESA049	pues si no más para aprender otro- otro instrumento um hace años cuando er- era más chico um tenía como el deseo	chico	child
CESA050		0
CESA051	/Sí, cuando yo era más pequeña, cuando tenía cinco años mi pap-mis papás se divorciaron	pequeña	child
CESA052		0
CESA056	No- no puedo relacionar con eso porque mis abuelos murieron cuando era muy pequeña	pequeña	child
CESA060	um, pues, lo- es conveniente vivir aquí pero a la misma vez es muy difícil compartir un cuarto tan pequeño con una persona	pequeño	size
CESA062	Y lo de aquí se fueron a algo- algo más pequeño todavía /algo más tranquilo/ mhm. [otro lugar]	pequeño	size
	Cuando llegamos allá a nos no gustaba para nada porque era mu:y pequeño y luego aparte de Yuma	pequeño	size
	Lo que-- tan pequeño que es, todos se conocen /mhm/ y: y no sé es muy tranquilo como es demasiado tranquilo diría yo [un lugar]	pequeño	size
CESA063		0
CESA065		0
CESA067	Uh porque cuando eran chicos, mi mamá, más o menos mi mamá, no mi papá porque él trabajó como a las 3 de la mañana	chicos	child
	Con los grandes, grandes, no. Pero con los con los más chicos, sí. Mi papá me: fui a la fiesta	chicos	child
	nosotros éramos ma-muy chicos /ah ok/ me gusta ver televisión	chicos	child
CESA070	y los otros primos están demasiados pequeños para ir /	pequeños	child
	Además de eso, uhm, íbamos a Disneylandia cada cuatro años cuando yo era chico	chico	child
	Sí: yo cuando era chico no podía pronunciar mi- mis r’s, así es que me xxx terapia de lenguaje.	chico	child
CESA071		0
CESA072		0
CESA073	Siento como que eran muchos pequeños detalles /mmm/.	pequeños	size
CESA076		0
CESA077	Tipo lo que es un Ace (EI) aquí, pero más, ah, chico más familiar, así.	chico	size
	Entonces siento que no (…) socializan y no tienen esas experiencias /sí/ (…) que tuvimos nosotros como chicos, definitivamente	chicos	child
	Mi papá se mudó a Nogales muy chico.	chico	child
	Entonces, desde muy chicos (…) yo no conozco familia de que esté en México	chicos	child
	Pero no lo ofrecían en Nogales; no /¿no?/ había. Nom Nogales es muy chico.	chico	size
CESA078	cuando comparten en grupo o en equipos. Grupos más pequeños o grupo entero.	pequeño	size

## Sheet: Excluded informants
Informants	Age	Education	Place of birth	Mother PoB	Father PoB	comments	excluded?	Reason for exclusion
CESA002	30 - 39	BA/BS	Mexico	Mexico	Mexico		ex	born and raised in Mexico until age 23
CESA003	20 - 29	BA/BS	US	Mexico	Mexico		ex	Participant was raised in México until age 8
CESA008	50 - 59	MA/MS	US	US	US		ex	zero tokens
CESA010	20 - 29	BA/BS in Process	US	US	Puerto Rico	Informant does not use Spanish in community	ex	one parent was born in US and the other in Puerto Rico. Ex
CESA012	50 - 59	BA/BS	Mexico	Mexico	Mexico		ex	Interviewee was not born in The United States.
CESA014	20 - 29	BA/BS in Process	US	Mexico	Mexico		ex	Born in US but raised in Sonora, Mexico.
CESA015	60 and over	Elementary School	Mexico	Mexico	Mexico		ex	interviewee was born in Mexico.
CESA017	20 - 29	BA/BS in Process	Mexico	Mexico	Mexico		ex	Informant born in Mexico
CESA019	40 - 49	High School	Mexico	Mexico	Mexico		ex	Informant born in Mexico
CESA026	40 - 49	BA/BS	Mexico	N/A	N/A		ex	Informant born in US but raised in Mexico
CESA029	under 20	BA	US	Mexico	Mexico	excluded/ lived in Mexico for long time	ex
CESA030	20-29	MA	Mexico	Mexico	Mexico	excluded/ participant born in Mexico	ex
CESA032	20-23	BA	Mexico	Mexico	Mexico	excluded/ participant born in Mexico	ex
CESA035	20-29	BA	Mexico	Mexico	Mexico	excluded/ participant born in Mexico (arrived to USA at age 8)	ex
CESA039	--	BA/BS in process	Mexico	Mexico	Mexico	excluded/ participant born in Mexico (arrived to USA at age 8)	ex
CESA040	33	BA/BS	US	Mexico	Other	excluded / participant raised in Mexico for 12 years (6-18yrs old)	ex
CESA053	20-29	BA/BS in process	Chile	Chile	US	Informant was born in Chile but raised in Tucson since 4 years old; no tokens	ex	excluded/born in other Spanish speaking country
CESA054	60 and over	BA/BS in process	Mexico	Mexico	Mexico		ex	excluded/born in Mexico
CESA055	20-29	BA/BS in process	U.S.	Mexico	Mexico	Raised in Mexico until age 15	ex	rasied in Mexico
CESA057	50-59	MA/MS	Mexico	Mexico	Mexico		ex	excluded/born in Mexico
CESA058	20-29	BA/BS in process	U.S.	Mexico	Mexico	Raised in Mexico until age 10	ex	excluded/raised in Mexico
CESA059	20-29	BA/BS in process	U.S.	Mexico	Mexico	Raised in Mexico until age 13	ex	excluded/raised in Mexico
CESA061	20-29	MA/MS in process	U.S.	Mexico	Mexico	Raised in Mexico until age 15	ex	excluded/raised in Mexico
CESA064	20-29	BA/BS in process	Mexico	Mexico	Mexico		ex	excluded/born in Mexico
CESA066	20-29	BA/BS in process	U.S.	Mexico	U.S.	No bilingual profile data	ex
CESA068	20-29	BA/BS	U.S.	Mexico	Mexico	Informant raised in Mexico until college	ex	excluded/raised in Mexico
CESA069	20-29	BA/BS	Mexico	Mexico	Mexico		ex	excluded/born in Mexico
CESA074	50-59	Associates	Mexico	Mexico	Mexico		ex	Born & raised in Mex
CESA075	50-59	BA/BS in process	Mexico	Mexico	Mexico		ex	Born & raised in Mex
