# Supplementary material for: Expressing diminutive meaning in heritage Spanish: linking the heritage experience to diminutive use in everyday speech
Source: Frontiers journal article supplement (doi:10.3389/flang.2024.1377977), 2024-07-08
Supplement: Table_2.XLSX [file Table_2.XLSX]

## Sheet: Mexicali_Corpus
ID	word count	recording date	Duration in Min	Place of birth	sex	age	profession	Sentence where the target token occurs	Target token	Semantic Sense	DIM type	Allomorph	Lexicalized	Word type	Pragmatics
MXLI_H13_003	6145	2015-09-17	38	Sonora	m	23	accountant	no / la verdad no // lo veo más como un hobby que ahorita / me está permitiendo obtener un ingreso extra	ahorita		ito	ito	lex	adv	ex
					m			/ no nomas en el aspecto económico de prestaciones / sino que cada vez se están cerrando un poquito más las puertas	poquito		ito	ito	no	adv	1c
					m			y ahorita él se encuentra en la ciudad de México trabajando como / gerente general del de la empresa	ahorita		ito	ito	lex	adv	ex
					m			pues ahorita trato de enfocarme más en el presente que en el futuro [Respuesta a pregunta: ¿Tienes plan de futuro?]	ahorita		ito	ito	lex	adv	ex
					m			ahorita / nada más mi mente está como / en / en hacer la la maestría no como ahora sí semana a semana	ahorita		ito	ito	lex	adv	ex
MXLI_H23_004	6868	2015-10-18	47	Mexicali	m	47	accountant	algo que no tiene por ejemplo F. (nombre) E. es inteligente / pero le cuesta un poquito más de trabajo	poquito		ito	ito	no	adv	1c
					m			ni fractura<alargamiento/>s ni<alargamiento/>golpes en la cabeza<alargamiento/>/ o sea lo loquito es natural	loquito		ito	ito	no	adj	3b
					m			ahorita te voy a platicar una anécdota de con ella	ahorita		ito	ito	lex	adv	ex
					m			tenemos una foto / la de<alargamiento/>cuando el cochito	cochito		ito	ito	lex	n	ex
					m			y no pues ya / nos / nos casamos y hasta ahorita ¿no? ahorita<alargamiento/>/ ha disfrutado de mí	ahorita		ito	ito	lex	adv	ex
MXLI_H33_09	3826	2015-09-24	26	Mexicali	f	64	engineer	mi madre de u<alargamiento/>n pueblito un ranchito más bien que se llama / este	pueblito		ito	ito	no	n	1a
					f			mi madre de u<alargamiento/>n pueblito un ranchito más bien que se llama / este	ranchito		ito	ito	no	n	1a
					f			[gracias al movimiento del 68] hubo ese cambio tan trascendental que estamos ahorita / viviendo actualmente	ahorita		ito	ito	lex	adv	ex
MXLI_H12_011	9234	2015-09-28	42	Mexicali	m	21	soldier	o estando adentro / jugar las maquinitas de peso //que era jugar	maquinitas		ito	ito	lex	n	ex
					m			la tiendita que está ahí/ la /en el piso de abajo	tiendita		ito	ito	no	n	1a
					m			pero pues ahorita ese es mi plan nomás // llegar y<alargamiento/>/ terminar la carrera	ahorita		ito	ito	lex	adv	ex
MXLI_H22_015	5029	2015-03-09	37	Tijuana	m	52	bank teller	hasta ahorita llevo ya un año y medio / prácticamente me queda un año y medio para poderla concluir	ahorita		ito	ito	lex	adv	ex
					m			o normal que hacemos nosotros es / eh / darnos un pastel / cantarnos las mañanitas	mañanitas		ito	ito	lex	n	ex
					m			ahorita ya de grande / pues / prácticamente es un poco difícil	ahorita		ito	ito	lex	adv	ex
					m			mhm / no recuerdo ninguno ahorita	ahorita		ito	ito	lex	adv	ex
					m			y ahorita uno de grande / pues / eh / se acuerda de ese tiempo y dice	ahorita		ito	ito	lex	adv	ex
					m			y ahorita que estoy ya en esta edad es lo que me pongo a pensar bastante / y digo pues gracias a dios	ahorita		ito	ito	lex	adv	ex
					m			y hasta ahorita pues gracias a él estamos	ahorita		ito	ito	lex	adv	ex
					m			a autorización para estudiarla / y hasta ahorita es lo que / lo que estoy haciendo	ahorita		ito	ito	lex	adv	ex
					m			no / no tengo / no tengo un plan o una meta hasta ahorita	ahorita		ito	ito	lex	adv	ex
MXLI_H32_018	6318	2015-10-26	54	Mexicali	m	59	catton seller/comerciante	[la ciudad de Norte de Carolina] es como puros bosques y o sea como <ininteligible/>/ no está planita	planita		ito	ito	no	adj	1c
					m			nada más <observación_complementaria = "nomás"/>hacen / también va saliendo un tubito y ya nada más	tubito		ito	ito	no	n	1a
					m			ero ya ahorita todos son / traen <observación_complementaria = "train"/>como computadora pues un programa	ahorita		ito	ito	lex	adv	ex
					m			y allí en Yuma agarramos una / un avioncito / bueno <silencio/>/ me tocó irme en un avioncito	avioncito		ito	cito	no	n	1a
					m			de un / de un motorcito	motorcito		ito	cito	no	n	1a
					m			ahí vas // parecía que apenas podía el avioncito	avioncito		ito	cito	no	n	1a
					m			no // <ininteligible/>/ me subí al camioncito y ¡no! me dejó hasta por allá	camioncito		ito	cito	no	n	1a
					m			nomás/>se miraban de vez en cuando unas rayitas abajo unas rayitas de los / de los carros	rayitas		ito	ito	no	n	1a
					m			cuando ya iba a aterrizar // unas rayitas de los ca <palabra_cortada/>/ el caminito	rayitas		ito	ito	no	n	1a
					m			cuando ya iba a aterrizar // unas rayitas de los ca <palabra_cortada/>/ el caminito	caminito		ito	ito	no	n	1a
					m			el caminito de los carros que hacían / pero todos los techos blancos	caminito		ito	ito	no	n	1a
					m			nomás"/>las carreteritas son las que se miraban ahí donde / caminaban los carros	carreteritas		ito	ito	no	n	1a
					m			pero también de ahí de Los / de Los Ángeles al Centro también era un avioncito	avioncito		ito	cito	no	n	1a
					m			también ¿no? // ese eran creo que dos filitas //dos filitas pegadas	filitas		ito	ito	no	n	1a
					m			pero también un avioncito de <ruido = "hace ruido de avión	avioncito		ito	cito	no	n	1a
					m			nos llevaron de ahí del / del avión a agarrar el avioncito	avioncito		ito	cito	no	n	1a
					m			tranquilo // había barecillos así/ pero no / tranquilo	barecillos		illo	ex	no	n	1a
					m			había un viejito // era papá de un trabajador también / bien viejito ya como ochenta	viejito		ito	ito	no	n	2a
					m			había un viejito // era papá de un trabajador también / bien viejito ya como ochenta	viejto		ito	ito	no	adj	1c
					m			que era el supervisor porque / ya viejito	viejito		ito	ito	no	adj	2a
					m			amanecía el caracolillo ahí// se hacían rosca ahí en la alfombra ¿no?	caracolillo		illo	ex	no	n	1a
					m			ya teníamos casita / era	casita		ito	ito	no	n	2a
					m			sí el carrillo estaba nuevo / pero lo habían correteado allá pues	carrillo		illo	ex	no	n	2a
					m			jalaba suave el carrillo	carrillo		illo	ex	no	n	2a
					m			no / ahorita / ahorita / tsss / ya es que estaba todo / todavía había parte	ahorita		ito	ito	lex	adv	ex
					m			y ahorita apenas acabo de ver que están haciendo el tren	ahorita		ito	ito	lex	adv	ex
					m			como está fresco allá/ no había ahí/ no había / estaba como planito pues / no había árboles	planito		ito	ito	no	adj	1c
					m			ya ve que / que allí afuera había puestecitos de // pues había muchos estaba	puestecitos		ito	cito	no	n	1a
					m			o sea / no pues ahorita Puebla está	ahorita		ito	ito	lex	adv	ex
					m			no le hice caso no pues me<alargamiento/>/ estaba la patrullita	patrullita		ito	ito	no	n	1b
					m			yo ahorita voy aquí/ voy al aeropuerto a / por un compañero	ahorita		ito	ito	lex	adv	ex
					m			luego / como no traen patrullas / ¡shh! / ¡shh! / y un chiflillo ¿no? /	chiflillo		illo	ex	no	n	1a
					m			traía mucha feria / y pues <observación_complementaria = "pos"/>agarré una bolsita y la metí abajo del asient	bolsita		ito	ito	no	n	1a
					m			entonces ¡ay! / se amarró el de enfrente y ¡pum! se me / me amarré y le alcancé a pegar a una camionetita	camionetita		ito	ito	no	n	1a
					m			dije <cita>no pues le voy a dar una feriecilla ahí	feriecilla		illo	ex	no	n	3a
					m			hasta eso / unos 500 pesos algo así / una camionetilla vieja también	camionetilla		illo	ex	no	n	2b
					m			y ahorita que nos lleven el carro	ahorita		ito	ito	lex	adv	ex
					m			yo me voy a arreglar con él ahorita / de cuánto sale su daño	ahorita		ito	ito	lex	adv	ex
					m			con bajarme // sí me habían pagado una feriecilla / más o menos	feriecilla		illo	ex	no	n	3a
					m			quiero descargar esto </cita>/ <cita>no / simón ahorita	ahorita		ito	ito	lex	adv	ex
					m			y por descargar un camión ya se agarraban una feriecilla	feriecilla		illo	ex	no	n	3a
					m			ahorita voy con mi gente yo para <observación_complementaria = "pa"/>descargarlo	ahorita		ito	ito	lex	adv	ex
MXLI_H11_019	4500	2015-06-25	30	Mexicali	m	27	brick layer	ahorita tengo como dos meses que<alargamiento/>/ do<alargamiento/>s o dos y medio de mes que hice la primaria	ahorita		ito	ito	lex	adv	ex
					m			y ahorita voy empezando pero son doce libros (ahorita = otra vez en el año)	ahorita		ito	ito	lex	adv	ex
					m			la señora no quiso dar / ahorita donde da clases donde daba igual / pues ya sí me queda lejos unos tres kilómetros ahora	ahorita		ito	ito	lex	adv	ex
					m			pues ahorita donde estamos lo que es de la<alargamiento/>la comunidad ahí de la<alargamiento/>/ de<alargamiento/>	ahorita		ito	ito	lex	adv	ex
					m			de ahí de donde vivo de la Z. ahorita vamo<alargamiento/>s vamos como dieciocho	ahorita		ito	ito	lex	adv	ex
					m			él ya fue y se<alargamiento/>/ se<alargamiento/>apuntó y ahorita ya está yendo	ahorita		ito	ito	lex	adv	ex
					m			sí sí me gusta pero es poquito<alargamiento/>sí está difícil pero<alargamiento/>/ ahí vamos poco a poco	poquito		ito	ito	no	adj	1c
					m			no no gasto hasta un lápiz ¿verdad? no y hasta ahorita no<alargamiento/>/ pues no he gastado (en materiales escolares)	ahorita		ito	ito	lex	adv	ex
					m			es de la comunidad del / es como u<alargamiento/>n saloncito pero chico	saloncito		ito	cito	no	n	1a
					m			pero chico está grande el cuartito / no está emplastado no tiene luz no tiene agua	cuartito		ito	ito	no	n	1c
					m			y donde están ahorita está en el Pápago y la señora pue<alargamiento/>s / es más chico más reducido	ahorita		ito	ito	lex	adv	ex
					m			y está todo bie<alargamiento/>n es como un cuartito normal	cuartito		ito	ito	no	n	1a
					m			apenas terminé la / la / la <risas = "I"/>ahorita voy terminando la primaria	ahorita		ito	ito	lex	adv	ex
					m			ahorita<alargamiento/>ellos tienen computadora en la / en la primaria	ahorita		ito	ito	lex	adv	ex
					m			orita/>no / no / no me han fijado tener una computadora en la casa para busca	ahorita		ito	ito	lex	adv	ex
					m			ahorita / hasta ahorita no / no no pues no le sé mover a la computadora pues menos	ahorita		ito	ito	lex	adv	ex
					m			ahorita no / no le están enseñando<alargamiento/>/ pero es que él también va en / e<alargamiento/>n tercero	ahorita		ito	ito	lex	adv	ex
					m			ahorita todavía no le<alargamiento/>han enseñado	ahorita		ito	ito	lex	adv	ex
					m			ahorita creo poquito más / e<alargamiento/>n cuarto yo creo a lo mejor ya le están enseñando	ahorita		ito	ito	lex	adv	ex
					m			ahorita creo poquito más e/<alargamiento/>n cuarto yo creo a lo mejor ya le están enseñando	poquito		ito	ito	no	adv	1c
					m			pero ahorita todavía no (le han enseñado inglés)	ahorita		ito	ito	lex	adv	ex
					m			¿de inglés? horita en esos libros no es español nada más	horita		ito	ito	lex	adv	ex
					m			ahí estamos bien ahorita<alargamiento/>y<alargamiento/>/ y pues ahorita la decisión de si ir a la escuela	ahorita		ito	ito	lex	adv	ex
					m			ahí estamos bien ahorita<alargamiento/>y<alargamiento/>/ y pues ahorita la decisión de si ir a la escuela	ahorita		ito	ito	lex	adv	ex
					m			la decisión de si ir a la escuela batallo poquito pero<alargamiento/>pues ahí voy	poquito		ito	ito	no	adv	1c
					m			pero ahorita primero es la<alargamiento/>/ es la / es la secundaria son mis metas ahorita	ahorita		ito	ito	lex	adv	ex
					m			pero ahorita primero es la<alargamiento/>/ es la / es la secundaria son mis metas ahorita	ahorita		ito	ito	lex	adv	ex
					m			y pues más porque pues ahorita los trabajos no-no me deja mucho tiempo de estar yendo a la escuela	ahorita		ito	ito	lex	adv	ex
					m			y ahorita pues no / no no ha trabajado ella porque pues no lo ocupamos	ahorita		ito	ito	lex	adv	ex
					m			ahorita ya tengo<alargamiento/>dos hijos	ahorita		ito	ito	lex	adv	ex
MXLI_M13_029	13293	2016-09-27	73	Mexicali	f	29	self-employed	poquito de todo </entre_risas>/ ah no te creas	poquito		ito	ito	no	adv	1c
					f			pues<alargamiento/>ahorita autoempleado	ahorita		ito	ito	lex	adv	ex
					f			y pues ahorita mi modo de vida / pues como soy / bueno como estoy trabajando	ahorita		ito	ito	lex	adv	ex
					f			pues en la act <vacilación/>/ ahorita actualmente no leo tanto	ahorita		ito	ito	lex	adv	ex
					f			me fui a vivir a Canadá y pues ahí también este aprendí<alargamiento/>un poquito más ¿no?	poquito		ito	ito	no	adj	1c
					f			y también me fui el año pasado<alargamiento/>a estudiar a Roma un poquito	poquito		ito	ito	no	adv	1c
					f			pues ahorita mi pasatiempo sería el gimnasio y pues <entre_risas>trato de dedicarle tiempo	ahorita		ito	ito	lex	adv	ex
					f			y ahí estuve trabajando poquito más de un año	poquito		ito	ito	no	adj	1c
					f			ahorita ya es jubilado / trabajó<alargamiento/>creo que como 25 años en el seguro social	ahorita		ito	ito	lex	adv	ex
					f			y ahorita ya se jubiló hace como unos dos años	ahorita		ito	ito	lex	adv	ex
					f			y ahorita trabaja<alargamiento/>/ pues es prácticamente autoempleado / tiene muchos contactos en / bueno aquí en Mexicali	ahorita		ito	ito	lex	adv	ex
					f			acaba de pasar ahorita lo que es el examen de la especialidad /	ahorita		ito	ito	lex	adv	ex
					f			y de hecho ahorita anda de viaje en Guadalajara porque fue a visitar	ahorita		ito	ito	lex	adv	ex
					f			mi abuelita tuvo ocho hijos / mi mamá creo que es la mayor <risas = "I"/>	abuelita		ito	ito	no	n	2a
					f			no los demás también pero / esos son los chiquitos / esos son <simultáneo>los niños chiquitos	chiquitos	child	ito	ito	no	adj	2a
					f			y pues ya esos son mis primitos que<alargamiento/>pues la verdad es que sí los quiero mucho	primitos		ito	ito	no	n	2a
					f			sí es / este es complicadín	complicadín		ín	ex	no	adj	1c
					f			ahorita ya se va a casar / y pues / decidió hacer una despedida en Playa del Carmen	ahorita		ito	ito	lex	adv	ex
					f			y ahorita soy yo la que está organizando<alargamiento/>/ pues el viaje	ahorita		ito	ito	lex	adv	ex
					f			ahorita no me acuerdo de / de casi nada / y cuando me junto con mis amigas	ahorita		ito	ito	lex	adv	ex
					f			que acuérdate que fuimos acá y allá/ y que el hondita verde	hondita		ito	ito	no	n	2a
					f			yo tampoco nunca las agregué/ de repente ahorita las veo porque están en el grupo de<alargamiento/>/ de las damas	ahorita		ito	ito	lex	adv	ex
					f			sí/ lo que pasa es que éramos un / un grupito de tres ch <vacilación/>/ chavitas	grupito		ito	ito	no	n	1a
					f			sí/ lo que pasa es que éramos un / un grupito de tres ch <vacilación/>/ chavitas	chavitas		ito	ito	no	n	2a
					f			venía yo manejando y<alargamiento/>era como / bueno era tardecito ¿no? /	tardecito		ito	cito	no	adv	1c
					f			y en eso llegó un señor viejito que<alargamiento/>/ que me salvó la vida	viejito		ito	ito	no	adj	2a
					f			que si no me hab <vacilación/>/ que si no me hubieran llevado en ese ratito	ratito		ito	ito	no	n	1c
					f			es que son anécdotas bien cortitas / pero ya te las <simultáneo>cuento	cortitas		ito	ito	no	adj	1c
					f			también quisiera platicar un poquito sobre el / sobre algo también padre que tiene Montreal	poquito		ito	ito	no	adv	1c
					f			pues adentro de las pieles de animales está como súper calientito ¿no?	calientito		ito	ito	no	adj	1c
					f			pura gente joven / chavitos en sus veintes ¿no?	chavitos		ito	ito	no	n	2a
					f			porque volteaba y estaba de que el abuelito sin camisa acá/ <simultáneo>bailando acá	abuelito		ito	ito	no	n	3b
					f			no sé si has visto así como que los perritos / no sé creo que son los huskies	perritos		ito	ito	no	n	1a
					f			como que / no sé/ si tú quieres puedes subirte a uno de esos carrito	carrito		ito	ito	no	n	1a
					f			en invierno ellos lo que hacen es que / bueno tienen su miel maple como en un jarrito ¿no?	jarrito		ito	ito	no	n	1a
					f			y ellos lo que hacen es que en una barrita ponen un montón de nieve	barrita		ito	ito	no	n	1a
					f			y la ponen y luego / arriba de la barrita	barrita		ito	ito	no	n	1a
					f			o sea agarran la miel <ruido = "shh"/>/ y ponen una rayita de miel y ya te esperas como 30/ 40 segundos	rayita		ito	ito	no	n	1a
					f			y luego te dan un palito de paleta / y tú la agarras y tú la vas enrollando así	palito		ito	ito	no	n	1a
					f			y ya al final / ya tienes como un rollito de palito / de palita	rollito		ito	ito	no	n	1a
					f			y ya al final / ya tienes como un rollito de palito / de palita	palito		ito	ito	no	n	1a
					f			es como<alargamiento/>una cosita súper típica [la paleta de maple]	cosita		ito	ito	no	n	2a
					f			sí/ y ya nos fuimos a nuestros taquitos	taquitos		ito	ito	no	n	2a
					f			y pues llegas a la parte africana y hay puros de que / puros negritos bailando acá de <simultáneo>que / íngatu	negritos		ito	ito	no	n	3a
					f			la rellenaron de arena y se hizo todo así como que la plataformita esta así/	plataformita		ito	ito	no	n	1b
					f			tipo / entro al caminito y está padre porque es como un caminito<alargamiento/	caminito		ito	ito	no	n	1a
					f			y luego / ya acá está este caminito así/ bonito / súper padre	caminito		ito	ito	no	n	1a
					f			pues no sé<alargamiento/>/ como de tierrita o <simultáneo>algo así [un caminito de tierrita]	tierrita		ito	ito	no	n	1b
					f			y luego algunos en el charquito ahí remojándose y así/ pero o sea en realidad es un lago que no tiene nada de olas	charquito		ito	ito	no	n	1b
					f			o sea iba a cerrar de que lo que es el restaurante <simultáneo>y los barecitos	barecitos		ito	cito	no	n	1a
					f			y no te / no te dejan dejan ni un minuto más / así igualito	igualito		ito	ito	no	adj	1c
					f			o sea en realidad sí me da <risas = "I"/>/ un poquito de flojera regresar	poquito		ito	ito	no	adv	1c
					f			son una ventaja allá y que a lo mejor ahorita / pues no son así como de vida o muerte para mí/	ahorita		ito	ito	lex	adv	ex
MXLI_H21_023	7004	2010-09-05	37	Mexicali	m	68	retail agriculture	y / y ahí entré y ahí fui / fui escalando poco a poquito	poquito		ito	ito	no	adv	1c
					m			ocupaba un<alargamiento/>/ un morro<alargamiento/>ligero pues / delgado / ligerito / flaco	ligerito		ito	ito	no	adj	3a
					m			sí / pues / en algunas fallitas / como un<alargamiento/>ejemplo	fallitas		ito	ito	no	n	1c
					m			dejábanos "/>en forma de viborita y al<alargamiento/>patrón nos / nos regañaba pues	viborita		ito	ito	no	n	1a
					m			y ya pues eso fue hace seis años / ahorita <observación_complementaria = "orita"/>ya tenemos	ahorita		ito	ito	lex	adv	ex
					m			eh / y ya poco a poquito te vas aprendiendo los códigos	poquito		ito	ito	no	adv	1c
					m			y ya<alargamiento/>/ ahí poco a poquito ya / le dimos a echarnos más jalecitos	poquito		ito	ito	no	adv	1c
					m			le dimos a echarnos más jalecitos / a archivar / recabar firmas de vales	jalecitos		ito	cito	no	n	1c
					m			él me echa la mano allá afuera y yo aquí en lo / lo que es los números / numeritos	numeritos		ito	ito	no	n	1c
					m			pos/>/ parece que ahorita sí vamos bien ¿vedá? /	ahorita		ito	ito	lex	adv	ex
					m			ero estricta en los jales / estricta en los jalecitos	jalecitos		ito	cito	no	n	1c
					m			pues <observación_complementaria = "pos"/>dos tres jalecillos te / te / dos tres pruebas te ponen y sí	jalecillos		illo	ex	no	n	1c
					m			lo suplantó el<alargamiento/>/ compa D. / uno gordito /	gordito		ito	ito	no	adj	3a
					m			y ya<alargamiento/>poco a poquito lo fuim <palabra_cortada/>lo fuimos cotorreando	poquito		ito	ito	no	adv	1c
					m			pues<alargamiento/>/ poco a poquito y con el tiempo pues / invitándole a / invitándolo a comer / en el lonche	poquito		ito	ito	no	adv	1c
					m			ahorita ya tiene / tiene como unos tres meses en el	ahorita		ito	ito	lex	adv	ex
					m			que yo voy a ser el que les va a poner jalecitos	jalecitos		ito	cito	no	n	1c
					m			no fíjate / hasta ahorita <observación_complementaria = "orita"/>hemos estado jalando / bien	ahorita		ito	ito	lex	adv	ex
					m			dice que entre semana / el jueves / que sintió los dolorcitos / y que se le aplacó	dolorcitos		ito	ito	no	n	3a
					m			y ahorita quiero ir a / a la <ininteligible/>antes de que se mueva la gente	ahorita		ito	ito	lex	adv	ex
					m			y ahorita voy para <observación_complementaria = "pa"/>allá / ahí para <ininteligible/>lo agarra la pinchi	ahorita		ito	ito	lex	adv	ex
					m			un<alargamiento/>un viejito así medio / no tan viejito pero/ medio apachurradito	viejito		ito	ito	no	n	3a
					m			un<alargamiento/>un viejito así medio / no tan viejito pero/ medio apachurradito	apachurradito		ito	ito	no	adj	1c
					m			como a la una fuimos por una / un lonchecito / unas heladitas	lonchecito		ito	cito	no	n	1a
					m			como a la una fuimos por una / un lonchecito / unas heladitas	heladitas		ito	ito	no	n	2a
					m			andé a mi carnal / por unas botellitas y nos tomamos un docecito /	botellitas		ito	ito	no	n	2a
					m			andé a mi carnal / por unas botellitas y nos tomamos un docecito /	docecito		ito	cito	no	n	2a
					m			y ya / me acondicionaron un cuartito pues / un cuarto güey	cuartito		ito	ito	no	n	1a
					m			tenía muchos problemas con su abuelita / como ella vivía con su abuela	abuelita		ito	ito	no	n	2a
					m			las / la atarraya / la hielerita / y / y los botes y la chingada y/ tres /	hielerita		ito	ito	no	n	1a
					m			de la tortuguita / pues ese cabrón lo / lo sacamos de las drogas	tortuguita		ito	ito	no	n	1a
					m			cero drogas/ pues hasta ahorita / cero drogas / cero cigarros/	ahorita		ito	ito	lex	adv	ex
					m			la / la cuñada / está / está bonita y curiosita y la respeto y la chingada pero / en los sueños uno no manda	curiosita		ito	ito	no	adj	1c
					m			y estaba mi niña acostada conmigo ahí a un ladito	ladito		ito	ito	no	adv	1c
					m			y ya cuando se<alargamiento/>/ calmó un poquito me salí para afuera	poquito		ito	ito	no	adj	1c
					m			en el/ pues en la ramada / ahí enfrentito pues / afuera de la ramada	enfrentito		ito	ito	no	adv	1c
					m			ya ves que ahorita está muy avanzada la ciencia	ahorita		ito	ito	lex	adv	ex
MXLI_H31_027	6593	2015-10-19	49	Chihuahua	m	68	retired	luego pues ya // conocí a mi güerita y pues ya menos / ya me quedé más amarrado	güerita		ito	ito	no	adj	2a
					m			estar entre puros <ruido = "celular"/>chamaquillos así/	chamaquillos		illo	ex	no	n	2a
					m			pues sí/ sí me sirvió poquito // <silencio/>no lo practiqué	poquito		ito	ito	no	adj	1c
					m			pues sí// sí/ me profundicé un poquito más en electrónica	poquito		ito	ito	no	adv	1c
					m			pa/>descargarla es una chispita chiquita nada más <observación_complementaria = "nomás	chispita		ito	ito	no	n	1a
					m			pa/>descargarla es una chispita chiquita nada más <observación_complementaria = "nomás	chiquita	size	ito	ito	no	adj	1a
					m			nomás/>como un arrocito	arrocito		ito	cito	no	n	1a
					m			pues sí// y aquí tengo lo que yo le prometí a mi abuelita	abuelita		ito	ito	no	n	2a
					m			yo le decía a mi abuelita / <cita>abuelita / cuando yo esté grande	abuelita		ito	ito	no	n	2a
					m			mi abuelita se fue / y mi tío el que estaba aquí/ en paz descans	abuelita		ito	ito	no	n	2a
					m			pues así es la vida / mi abuelita se murió qué quieres	abuelita		ito	ito	no	n	2a
					m			me llevó mi abuelita para	abuelita		ito	ito	no	n	2a
					m			de todos los ruquitos de allá de mi pueblo	ruquitos		ito	ito	no	adj	3a
					m			sí pobrecito ya traía hambre <ruido = "golpe"/>// <cita>eh	pobrecito		ito	cito	no	adj	2a
					m			<cita>dónde iría ahorita yo adelante del carro </cita>/ dije	ahorita		ito	ito	lex	adv	ex
					m			¿inyecciones? / ¿no hay pastillitas?	pastillitas		ito	ito	no	n	3a
					m			para cuando se arrimara mi abuelita y la enfermera les tiraba con zapatazos	abuelita		ito	ito	no	n	2a
					m			y ahí está <cita>llénate mollotito llénate mollotito	mollotito		ito	ito	no	n	1a
					m			es como una bolita	bolita		ito	ito	no	n	1c
					m			que tiene muchas espinitas alrededor pues // y pues le dio el manotazo	espinitas		ito	ito	no	n	1a
					m			ah pues yo agarré <x>30</x>una abejita y la agarré de las alitas	abejita		ito	ito	no	n	1a
					m			ah pues yo agarré <x>30</x>una abejita y la agarré de las alitas	alitas		ito	ito	no	n	1a
					m			a carretera angostita y como allá estaba la zona de las chamaconas allá era	angostita		ito	ito	no	adj	1c
					m			omás"/>agarro trabajo y me / voy a hacer un dinerito	dinerito		ito	ito	no	n	3a
					m			no primito! / usted <observación_complementaria = "usté"/>de aquí no se va	primito		ito	ito	no	n	2b
					m			allí en parque me acostaba un ratito ahí a dormir	ratito		ito	ito	no	n	1c
					m			yo solito lo hice	solito		ito	ito	no	adj	2a
					m			ya tengo una caja llena de cobre / de motorcitos	motorcitos		ito	cito	no	n	1a
					m			ue yo lo / no por estudio / puro andar mirando como chinito	chinito		ito	ito	no	n	3a
					m			y me regaló mucho carretito del asiento de allá	carretito		ito	ito	no	n	1a
					m			uando hice mi primera extensión // por pedacitos	pedacitos		ito	ito	no	n	1a
					m			la que tiene dos alambritos	alambritos		ito	ito	no	n	1a
					m			porque una tía mía en paz descanse me regaló un foquito chiquito	foquito		ito	ito	no	n	1a
					m			porque una tía mía en paz descanse me regaló un foquito chiquito	chiquito	size	ito	ito	no	adj	1a
					m			ya tenga un foquito </cita>// ah pues cuando hice esa extensión	foquito		ito	ito	no	n	1a
					m			de esas bolitas <silencio/>// <cita>tenga para	bolitas		ito	ito	no	n	1c
					m			ya las enchufé y prendió el foquito y todo	foquito		ito	ito	no	n	1a
					m			está que ya prendió el foquito mire	foquito		ito	ito	no	n	1a
					m			porque prendió el foquito	foquito		ito	ito	no	n	1a
					m			esa sí mire / faltó poquito para ¡puf!	poquito		ito	ito	no	adv	1c
					m			otal que // ya los gatitos ya se quedaron abajo	gatitos		ito	ito	no	n	1a
					m			nomás/>por <énfasis>una </énfasis>// hebrita así de	hebrita		ito	ito	no	n	1a
					m			alambrito que quedó pegada en / en la caja // con esa	alambrito		ito	ito	no	n	1a
MXLI_M23_032	7500	2015-04-11	38	Mexicali	f	48	psychologist	/ no / ya ahorita no	ahorita		ito	ito	lex	adv	ex
					f			pues trato de venir mucho con mi mamá porque / está viejita ya	viejita		ito	ito	no	adj	3a
					f			cinco años / e<alargamiento/>h / la nin <palabra_cortada/>/ la hermanita	hermanita		ito	ito	no	n	2a
					f			el / el más chiquito murió/ y los otros dos niños / este<alargamiento/>/ no se murieron	chiquito	child	ito	ito	no	adj	2a
					f			el niño con síndrome de Down / bien listillo / o sea	listillo		illo	ex	no	adj	2a
					f			pero fue / unos poquitos meses nomás	poquitos		ito	ito	no	adj	1c
					f			yo creo que en aquellos años había un poquito más de oportunidad	poquito		ito	ito	no	adj	1c
					f			están chiquitas no me animaba [las hijas]	chiquitas	child	ito	ito	no	adj	2a
					f			vendiendo<alargamiento/>/ pues / sus montoncitos de / de fruta	montoncitos		ito	cito	no	n	1a
MXLI_M33_035	6684	2015-10-23	41	Mexicali	f	55	house wife	y C. / la más chiquita tiene 24 años / es mercadóloga también	chiquita	child	ito	ito	no	adj	2a
					f			una chihuahuita / y viven como reyes ellos [un perrita]	chihuahuita		ito	ito	no	n	2a
					f			un monitor sabana es una especie de<alargamiento/>como un cocodrilo chiquito	chiquito	size	ito	ito	no	adj	1a
					f			era una traila gris / mm<alargamiento/>que era un huevito / pero para nosotros	huevito		ito	ito	no	n	1a
					f			"encubadoras"/>cuando nacían los pollitos / <silencio/>em<alargamiento/>que yo	pollitos		ito	ito	no	n	1a
					f			tenía que estar checando que todos los pollitos	pollitos		ito	ito	no	n	1a
					f			les cortan el pico porque<alargamiento/>hay cierto canibalismo entre los pollitos	pollitos		ito	ito	no	n	1a
					f			que salían con dos yemas y esas dos yemas / era un pollito raro	pollito		ito	ito	no	n	1a
					f			pero yo cuidaba esos pollitos	pollitos		ito	ito	no	n	1a
					f			que les hacía hoyitos y me encantaba la purina	hoyitos		ito	ito	no	n	1a
					f			fíjate ahorita me estoy acordando y <simultáneo>yo era una niña	ahorita		ito	ito	lex	adv	ex
					f			pero esa una era una traila chiquita / chiquita / que yo no sé cómo vivíamos ahí	chiquita	size	ito	ito	no	adj	1a
					f			si supieras el pedazo que / era una / un huevito <simultáneo>gris	huevito		ito	ito	no	n	1a
					f			en la prepa<alargamiento/>empecé a flojearle un poquito	poquito		ito	ito	no	adv	1c
					f			ni / ni nada / nada serio puros <silencio/>/ cascaritas [de partido]	cascaritas		ito	ito	no	n	1c
					f			ahorita se llama La Merce / son puros ex CETYS	ahorita		ito	ito	lex	adv	ex
					f			y la más chiquita es la más chaparrita / como 1.70/	chiquita	child	ito	ito	no	adj	2a
					f			y la más chiquita es la más chaparrita / como 1.70/	chaparrita		ito	ito	no	adj	2a
					f			ya lo único que me va a marcar ahorita es mi nieta	ahorita		ito	ito	lex	adv	ex
					f			muy sana ahorita <observación_complementaria = "orita"/>/ hasta cierto punto es demasiado	ahorita		ito	ito	lex	adv	ex
					f			m<alargamiento/>uy diferente a lo que está pasando ahorita	ahorita		ito	ito	lex	adv	ex
					f			si está un<alargamiento/>clima bueno / una carnita asada	carnita		ito	ito	no	n	1c
					f			pero en tiempo de<alargamiento/>/ ya rico como ahorita	ahorita		ito	ito	lex	adv	ex
					f			ya nomás / con birotitos y órale	birotitos		ito	ito	no	n	1c
					f			y toca y dices / <cita>hey es cierto / yo fui feliz de chiquita	chiquita	child	ito	ito	no	adj	2a
MXLI_M22_042	9265	2015-05-16	47	Sonora	f	50	sectretary	hasta ahorita / ey	ahorita		ito	ito	lex	adv	ex
					f			solita así nomás / este / no sé pensando	solita		ito	ito	no	adj	2a
					f			o a la mejor y<alargamiento/>en lo que pienso me da sueñito y me duermo	sueñito		ito	ito	no	n	1c
					f			mi abuela hacia tortillitas de harina	tortillitas		ito	ito	no	n	2a
					f			í/ sí/ <simultáneo>vivíamos medio apeñuscaditos	apeñuscaditos		ito	ito	no	adj	1c
					f			tengo una sí// me gustan los perritos pero afuera / perritos grandes	perritos		ito	ito	no	n	2a
					f			sí / ajá es cafecita con ojos así como verdecitos	cafecita		ito	cito	no	adj	1c
					f			sí / ajá es cafecita con ojos así como verdecitos	verdecitos		ito	cito	no	adj	1c
					f			ajá / como chocolatita [color]	chocolatita		ito	ito	no	adj	1c
					f			ahorita <observación_complementaria = "orita"/>ya no <x>15</x>tomo	ahorita		ito	ito	lex	adv	ex
					f			no / porque sí es un poquito celosito	poquito		ito	ito	no	adj	1c
					f			no / porque sí es un poquito celosito [el marido]	celosito		ito	ito	no	adj	1c
					f			horita <observación_complementaria = "orita"/>que dijiste / y mira que a mi hijo le encanta	horita		ito	ito	lex	adv	ex
					f			o sea es un poquito / es muy apegado a mí pero no como mi hija	poquito		ito	ito	no	adj	1c
					f			él se él se me despega / se pierde un poquito más / ¿sí?	poquito		ito	ito	no	adv	1c
					f			M [nombre]. es más relajadita	relajadita		ito	ito	no	adj	1c
					f			porque el niño está muy chiquito para guardería y como yo trabajo	chiquito	child	ito	ito	no	adj	2a
					f			porque ella está haciendo un trabajito	trabajito		ito	ito	no	n	3a
					f			sí porque siempre se ha tardado poquito	poquito		ito	ito	no	adj	1c
					f			los muchachos pueden andar así como andas tu ahorita	ahorita		ito	ito	lex	adv	ex
					f			te llevaban la leche<alargamiento/>en / en todavía en / en / en el camioncito	camioncito		ito	cito	no	n	1a
					f			bueno / muy / muy aburriditas [las navidades]	aburriditas		ito	ito	no	adj	3a
					f			y lo que más se me antoje poquito / dos o tres cosas y ya	poquito		ito	ito	no	adv	1c
					f			ellos / aparte de su regalito que ellos me piden / su regalito	regalito		ito	ito	no	n	2a
					f			y tampoco mi esposo / entonces pues algo algo sencillito [para festejar]	sencillito		ito	ito	no	adj	1c
					f			25 hasta / vamos a cumplir 28/ una cenita nada más y un regalito cada quien con su pareja	cenita		ito	ito	no	n	2a
					f			25 hasta / vamos a cumplir 28/ una cenita nada más y un regalito cada quien con su pareja	regalito		ito	ito	no	n	2a
					f			lo más curvo / lo más delgadito / lo más sensible ahí/ lo más delicado ahí	delgadito		ito	ito	no	adj	1c
					f			una como chichoncito que le llaman así/ como que se me salió un poquito de / y eso	chichoncito		ito	ito	no	adj	1c
					f			una como chichoncito que le llaman así/ como que se me salió un poquito de / y eso	poquito		ito	ito	no	adj	1c
					f			no // hasta ahorita no todo bien	ahorita		ito	ito	lex	adv	ex
					f			hasta ahorita no	ahorita		ito	ito	lex	adv	ex
					f			lo he visto en una cama de hospital hasta ahorita bendito sea Dios	ahorita		ito	ito	lex	adv	ex
					f			ya fui mucho tiempo con él cuando estaban chiquitos	chiquitos	child	ito	ito	no	adj	2a
					f			o vamos a comer con nuestros hi<alargamiento/>jos / este<alargamiento/>o un cafecito	cafecito		ito	cito	no	n	2a
					f			pero cuando los niños estaban chiquitos todos	chiquitos	child	ito	ito	no	adj	2a
					f			no // su familia es un poquito más despegada / ajá	poquito		ito	ito	no	adj	1c
					f			y ellos no / ellos son un poquito más despegados en ese sentido	poquito		ito	ito	no	adj	1c
					f			los besa y antes no era así cómo muy<alargamiento/>sequito [no cariñoso]	sequito		ito	ito	no	adj	3a
					f			así un besito pues porque sus hijos y tenía que hacerlo	besito		ito	ito	no	n	1b
MXLI_M32_045	3499	2015-06-25	23	Michoacán	f	56	house wife	ahorita el / el / mediano<alargamiento/>está terminando su maestría en ed <palabra_cortada/>licenciado en educación	ahorita		ito	ito	lex	adv	ex
					f			pues ahorita <observación_complementaria = "orita"/>nomás soy ama de casa	ahorita		ito	ito	lex	adv	ex
					f			así cuando van a la escuela / estar haciendo sus dibujitos y todo eso	dibujitos		ito	ito	no	n	1b
					f			pues / ahorita la tecnología está muy bien / para los jóvenes que van ahorita con ella	ahorita		ito	ito	lex	adv	ex
					f			pues / ahorita la tecnología está muy bien / para los jóvenes que van ahorita con ella	ahorita		ito	ito	lex	adv	ex
					f			[los niños] quieren un<alargamiento/>jueguito de estar en el internet con el dedito nada más	jueguito		ito	ito	no	n	2b
					f			[los niños] quieren un<alargamiento/>jueguito de estar en el internet con el dedito nada más	dedito		ito	ito	no	n	2b
MXLI_M21_050	3528	2017-10-20	30	Sinaloa	f	50	house wife	con los dos más chicos pero / con el más chiquito con el / fue más peor	chiquito	child	ito	ito	no	adj	2a
					f			nunca me han gustado / de chiquita me dan pánico	chiquita	child	ito	ito	no	adj	2a
					f			ahorita ya no / ya no porque me / me retiré al cien por ciento	ahorita		ito	ito	lex	adv	ex
MXLI_M31_052	5453	2015-09-23	38	Mexicali	f	64	comerciante	tengo mis periquitos / darles comida	periquitos		ito	ito	no	n	2a
					f			y a darle </simultáneo>de comer a mis <simultáneo>pajaritos	pajaritos		ito	ito	no	n	1a
					f			pero mmm disfruto el frío / disfruto el frío / y<alargamiento/>este / tomar cosas calientitas	calientitas		ito	ito	no	adj	1c
					f			la tercera M. / y mi bebita B.	bebita		ito	ito	no	n	2a
					f			los bisnietos los veo ah / un poquito más retiradito porque no viven aquí/	poquito		ito	ito	no	adj	1c
					f			los bisnietos los veo ah / un poquito más retiradito porque no viven aquí/	retiradito		ito	ito	no	adv	1c
					f			ah este conviviendo / comemos tamalitos / pozole	tamalitos		ito	ito	no	n	2a
					f			mi hermano / actualmente / ahorita está enfermo / tiene cáncer de próstata	ahorita		ito	ito	lex	adv	ex
					f			o tomar un cafecito con mi esposo y platicar	cafecito		ito	cito	no	n	2a
					f			pues / <sic>horita </sic>/ ah este<alargamiento/>/ <silencio/>ah<alargamiento/>lo único que / que me preocupa es	ahorita		ito	ito	lex	adv	ex
					f			sí/ sí/ aquí <sic>cerquitas </sic>de / de / con nosotros / como a una<alargamiento/>s / cuatro o cinco cuadras	cerquitas		ito	ito	no	adv	1c
MXLI_M11_046	9428	2017-12-25	45	Mexicali	f	27	receptionist	pues<alargamiento/>/ un poquito menos frío que otros años / menos	poquito		ito	ito	no	adj	1c
					f			un chocolatito / no soy de café/ así que un chocolatito / un / caldito	chocolatito		ito	ito	no	n	1c
					f			un chocolatito / no soy de café/ así que un chocolatito / un / caldito	caldito		ito	ito	no	n	1c
					f			andar lo más que se pueda en el solecito	solecito		ito	ito	no	n	1c
					f			este<alargamiento/>/ ya ahorita como / ya / estoy más tiempo ahí ya / ya los vecinos	ahorita		ito	ito	lex	adv	ex
					f			ahorita no / ya tengo<alargamiento/><silencio/>/ pues ¡ay! l	ahorita		ito	ito	lex	adv	ex
					f			pues / la vedad ahorita / bueno que / sí me he estresado no de decir <cita>chin si me sacan con mis hijos	ahorita		ito	ito	lex	adv	ex
					f			ahorita / ajá/ dije / <cita>pues por algo pasan las cosas	ahorita		ito	ito	lex	adv	ex
					f			y dejo a mi hija la más chiquita con mi abuelita	chiquita	child	ito	ito	no	adj	2a
					f			y dejo a mi hija la más chiquita con mi abuelita	abuelita		ito	ito	no	n	2a
					f			teníamos que caminar / hasta allá/ sí/ sí está larguito	larguito		ito	ito	no	adj	1c
					f			vive mi abuelita en la Hidalgo	abuelita		ito	ito	no	n	2a
					f			y media de la tarde para poder regresar con mi abuelita	abuelita		ito	ito	no	n	2a
					f			ajá está ahí cerquitas aja	cerquitas		ito	ito	no	adv	1c
					f			y me iba con mi abuelita / me ponía mi uniforme y nos íbamos todos	abuelita		ito	ito	no	n	2a
					f			pues la verdad ahorita <observación_complementaria = "orita"/>/ ahorita estoy bien	ahorita		ito	ito	lex	adv	ex
					f			quiero lo primero ahorita pues <observación_complementaria = "ps"/>estudiar la preparatoria	ahorita		ito	ito	lex	adv	ex
					f			l[los hombres se hace ] sus arreglitos	arreglitos		ito	ito	no	n	3a
					f			de hecho hace poquito me volví a enfermar	poquito		ito	ito	no	adj	1c
					f			de hecho casi no tomo / es muy raro / tomo muy poquita [soda = refresco]	poquita		ito	ito	no	adj	1c
					f			si así tomo muy poquita y todos modos me enfermo	poquita		ito	ito	no	adj	1c
					f			pues sí están / si están cariñositos [los uniformes]	cariñositos		ito	ito	no	adj	2a
					f			o sea sí había amistad pues / pero ahorita ya no / ya ya todos	ahorita		ito	ito	lex	adv	ex
					f			salir a convivir un ratito / a veces / no siempre	ratito		ito	ito	no	n	1c
					f			pues el más chiquito tiene <extranjero>tablet </extranjero>	chiquito	child	ito	ito	no	adj	2a
					f			ajá ya ahorita ya es parte del trabajo porque saben que ahí te localizan	ahorita		ito	ito	lex	adv	ex
					f			se aventó como un mes así/ estarla nebulizando / inyectándola // pobrecita /	pobrecita		ito	cito	no	adj	2a
					f			y ahorita ya tengo<alargamiento/>un año y algo trabajando otra vez con ellas	ahorita		ito	ito	lex	adv	ex
					f			pues ahorita como ya empecé otra vez / seis días // que ya las agarré/ ¡ah!	ahorita		ito	ito	lex	adv	ex
MXLI_M12_039	4995	2016-10-08	40	Mexicali	f	22	factory worker	ahorita sería el medio / ¿no? / porque apenas entré a la universidad	ahorita		ito	ito	lex	adv	ex
					f			hasta ahorita <observación_complementaria = "orita"/>entré	ahorita		ito	ito	lex	adv	ex
					f			porque tiene mucho que ver con lo que estoy haciendo ahorita en el trabajo	ahorita		ito	ito	lex	adv	ex
					f			de esos que traen como<alargamiento/>huevito enmedio / y jamón	huevito		ito	ito	no	n	1b
					f			no es maltrato animal si el perro tiene su sombrita / tiene su agüita	sombrita		ito	ito	no	n	1c
					f			no es maltrato animal si el perro tiene su sombrita / tiene su agüita	agüita		ito	ito	no	n	1c
					f			la <sic>apendis </sic><silencio/>/ la traía<alargamiento/>con un agujerito	agujerito		ito	ito	no	n	1a
					f			como nadie me contestó/ me tuve que ir en Uber / yo solita	solita		ito	ito	no	adj	2a
					f			donde ya estaba yo / y al ratito llegó mi mamá	ratito		ito	ito	no	n	1c
					f			la mandaron a cirugía / tuvo a sus gemelitas	gemelitas		ito	ito	no	n	2a
					f			a la otra no porque la subieron / porque estaba muy chiquita	chiquita	size	ito	ito	no	adj	1a
					f			me tocó ver que una señora llegó con su bebito en la mano	bebito		ito	ito	no	n	1a
					f			porque se salió antes de tiempo y tenía el bebito en la mano	bebito		ito	ito	no	n	1a
					f			era para legrado ella / y tenía su bebito así en la mano	bebito		ito	ito	no	n	1a
					f			la doctora le dijo<alargamiento/>/ <cita>no / hágasela bonita / está chiquita [la paciente]	chiquita	size	ito	ito	no	adj	1c
Sum	119162	Average	40.8333
average	6620.11	Max	73
Max	13293	Min	23
Min	3499	SD	11.3669
SD	2493.33
